# Supplementary material for: Three Ablation Techniques for Atrial Fibrillation during Concomitant Cardiac Surgery: A Systematic Review and Network Meta-Analysis
Source: MDPI journal article supplement (doi:10.3390/jcm12175716), 2023-09-01
Supplement: s1 [file s1]

**Table S1.** Results of Databases Search

| <b>Database</b> | <b>Keyword(s)</b>                                                                                                                                                                                                                   | <b>Hits</b> |
|-----------------|-------------------------------------------------------------------------------------------------------------------------------------------------------------------------------------------------------------------------------------|-------------|
| Pubmed          | ((Atrial fibrillation) OR (AF) OR (fibrillation of atrial)) AND ((Pulmonary vein isolation) OR (PVI) OR (pulmonary vein ablation)) AND ((Left atrial maze) OR (left atrial ablation) OR (cox maze ablation) OR (biatrial ablation)) | 1,876       |
| Google Scholar  | ((Atrial fibrillation) OR (AF) OR (fibrillation of atrial)) AND ((Pulmonary vein isolation) OR (PVI) OR (pulmonary vein ablation)) AND ((Left atrial maze) OR (left atrial ablation) OR (cox maze ablation) OR (biatrial ablation)) | 1,200       |
| Cochrane        | ((Atrial fibrillation) OR (AF) OR (fibrillation of atrial)) AND ((Pulmonary vein isolation) OR (PVI) OR (pulmonary vein ablation)) AND ((Left atrial maze) OR (left atrial ablation) OR (cox maze ablation) OR (biatrial ablation)) | 45          |
| Scopus          | ((Atrial fibrillation) OR (AF) OR (fibrillation of atrial)) AND ((Pulmonary vein isolation) OR (PVI) OR (pulmonary vein ablation)) AND ((Left atrial maze) OR (left atrial ablation) OR (cox maze ablation) OR (biatrial ablation)) | 1,037       |
| Wiley           | ((Atrial fibrillation) OR (AF) OR (fibrillation of atrial)) AND ((Pulmonary vein isolation) OR (PVI) OR (pulmonary vein ablation)) AND ((Left atrial maze) OR (left atrial ablation) OR (cox maze ablation) OR (biatrial ablation)) | 266         |
| Embase          | ((Atrial fibrillation) OR (AF) OR (fibrillation of atrial)) AND ((Pulmonary vein isolation) OR (PVI) OR (pulmonary vein ablation)) AND ((Left atrial maze) OR (left atrial ablation) OR (cox maze ablation) OR (biatrial ablation)) | 6,075       |
| Medline         | ((Atrial fibrillation) OR (AF) OR (fibrillation of atrial)) AND ((Pulmonary vein isolation) OR (PVI) OR (pulmonary vein ablation)) AND ((Left atrial maze) OR (left atrial ablation) OR (cox maze ablation) OR (biatrial ablation)) | 130         |

|          |                                                                                                                                                                                                                                     |               |
|----------|-------------------------------------------------------------------------------------------------------------------------------------------------------------------------------------------------------------------------------------|---------------|
| ProQuest | ((Atrial fibrillation) OR (AF) OR (fibrillation of atrial)) AND ((Pulmonary vein isolation) OR (PVI) OR (pulmonary vein ablation)) AND ((Left atrial maze) OR (left atrial ablation) OR (cox maze ablation) OR (biatrial ablation)) | 6791          |
|          | <b>TOTAL</b>                                                                                                                                                                                                                        | <b>17,420</b> |
|          | <b>ABSTRACT SCREENED</b>                                                                                                                                                                                                            | <b>53</b>     |
|          | <b>INCLUDED</b>                                                                                                                                                                                                                     | <b>39</b>     |

Table S2. Patients Baseline Characteristics

| No | Author, year            | Study Design                                                 | Location      | Sample Size | Age (Range/ Mean±SD) |              |               | Gender (M/F) |         |          | Study period | Follow-up (median (IQR)/<br>Q1/ Mean±SD/months mentioned) (months) | Type of ablation                           | Lesion set                             | Concomitant Cardiac Surgery                                                                                 | Intervention ( BAA vs PVI) |     |      | Types of Atrial Fibrillation (AF)                                          |
|----|-------------------------|--------------------------------------------------------------|---------------|-------------|----------------------|--------------|---------------|--------------|---------|----------|--------------|--------------------------------------------------------------------|--------------------------------------------|----------------------------------------|-------------------------------------------------------------------------------------------------------------|----------------------------|-----|------|----------------------------------------------------------------------------|
|    |                         |                                                              |               |             | BAA                  | LAA          | PVI           | BAA          | LAA     | PVI      |              |                                                                    |                                            |                                        |                                                                                                             | BAA                        | LAA | PVI  |                                                                            |
| 1  | Haid et al. 2021        | Cohort retrospective                                         | Denmark       | 446         | 69.3 ± 9.2           | N/A          | 70.0 ± 8.1    | 88/21        | N/A     | 267/70   | 2004-2019    | 3-12                                                               | Radiofrequency                             | LAA, PVI, RAA                          | MVS, TVS, AVS, CABG                                                                                         | 109                        | N/A | 337  | Paroxysmal and/or persistent AF                                            |
| 2  | Albrecht et al. 2009    | Randomized controlled clinical trial                         | Brazil        | 40          | 51.7 ± 12.4          | N/A          | 55.1 ± 9.2    | 6/14         | N/A     | 6/14     | 1999-2004    | 6-24                                                               | Cut and sew, radiofrequency                | LAA,RAA,PVI                            | MVS                                                                                                         | 20                         | N/A | 20   | Paroxysmal AF                                                              |
| 3  | Shrivastava et al. 2008 | Randomized controlled clinical trial                         | India         | 120         | 37.11 ± 11.12        | 36.03 ± 7.99 | 40.95 ± 11.41 | 19/21        | 22/18   | 20/20    | 2000-2005    | 44                                                                 | Radiofrequency, cryoablation               | LAA, PVI, RAA                          | MVS, TVS                                                                                                    | 40                         | 40  | 40   | N/A                                                                        |
| 4  | Stulak et al. 2014      | Cohort retrospective                                         | United States | 893         | 514                  | 110          | 269           | N/A          | N/A     | N/A      | 1993-2011    | 33                                                                 | Cut and sew, radiofrequency, Cryoablation  | LAA, PVI, RAA                          | Repair of congenital heart disease : 351 (30.0)<br>Repair of adult-acquired disease : 1,186 patients (70.0) | 514                        | 110 | 269  | Paroxysmal and/or persistent AF                                            |
| 5  | Onorati et al. 2011     | Observational prospective                                    | Italy         | 141         | 64 ± 9               | 65 ± 8       | N/A           | 79/30        | 18/14   | N/A      | 2003-2008    | 1-60                                                               | Radiofrequency                             | LAA, RAA                               | MVS, AVS                                                                                                    | 109                        | 32  | N/A  | Persistent AF                                                              |
| 6  | Alexander et al. 2018   | Randomized controlled clinical trial                         | Russia        | 52          | N/A                  | 58.2 ± 7.9   | 56.5 ± 6.9    | N/A          | 11/14   | 11/16    | 2009-2011    | 18.6 ± 2.1                                                         | Radiofrequency                             | LAA,RAA,PVI                            | MVS, Left atrium thrombectomy,TVS, CABG                                                                     | N/A                        | 25  | 27   | Paroxysmal AF                                                              |
| 7  | Gauzebroek et al. 2008  | Cohort retrospective                                         | Netherlands   | 65          | 63.3 ± 7.9           | 61.1 ± 10.3  | 59.6 ± 13.5   | 20/5         | 10/18   | 7/5      | 1999-2005    | 3.1-81.2                                                           | Cut and sew, radiofrequency, Cryoablation  | PVI, LAA, RAA                          | CABG, TVS, MVS, AVS                                                                                         | 25                         | 28  | 12   | Paroxysmal and/or Persistent and/or Permanent AF                           |
| 8  | Ghadivi et al. 2008     | Clinical Trial                                               | Iran          | 90          | 49 ± 12.6            | 50 ± 12.4    | N/A           | 7/18         | 24/41   | N/A      | 2004-2006    | 1-12                                                               | Cryoablation                               | PVI, LAA, RAA                          | MVS, AVS                                                                                                    | 25                         | 65  | N/A  | Persistent AF with mitral valve                                            |
| 9  | Gillinov et al. 2015    | Randomized Controlled Trial                                  | Canada        | 106         | N/A                  | N/A          | N/A           | N/A          | N/A     | N/A      | 2010-2013    | 6-12                                                               | Cryoablation                               | PVI, LAA, RAA                          | CABG, TVS, MVS, AVS                                                                                         | 47                         | N/A | 59   | Persistent or longstanding persistent AF who required mitral valve surgery |
| 10 | Yildirim et al. 2022    | A Single Centered Retrospective Study                        | Germany       | 268         | N/A                  | 66.0 ± 8.6   | 67.4 ± 6.5    | N/A          | 51/35   | 115/67   | 2003-2016    | 3-12                                                               | Radiofrequency and cryoablation            | LAA, PVI, MI                           | AVR, CABG                                                                                                   | N/A                        | 86  | 182  | Paroxysmal AF                                                              |
| 11 | Wynn et al. 2016        | Multicenter Randomized Controlled Trial                      | England       | 124         | 61.9 ± 11.4          | N/A          | 61.8 ± 9.7    | 39/24        | N/A     | 45/16    | 2011-2013    | 3-12                                                               | Radiofrequency                             | PVI, LAA, RAA                          | none surgery                                                                                                | 63                         | N/A | 61   | Persistent or Sustained Paroxysmal AF                                      |
| 12 | Wang et al. 2009        | Prospective, open, and randomized trial with parallel groups | China         | 299         | 53.4 ± 10.8          | 54.2 ± 10.1  | N/A           | 54/96        | 62/87   | N/A      | 2004-2007    | 3-12                                                               | Radiofrequency                             | LAA,RAA,CS                             | CABG, TVS, MVS, AVS, Left atrial thrombectomy and closing                                                   | 150                        | 149 | N/A  | Persistent and/or Paroxysmal AF                                            |
| 13 | Cato et al. 2006        | Prospective, open, and randomized trial with parallel groups | Italy         | 80          | 57.9 ± 8.9           | 59.2 ± 9     | N/A           | 26/13        | 26/15   | N/A      | N/A          | 14 ± 5                                                             | Radiofrequency                             | MI, PVI, CS, cavotricuspid isthmus     | MVS,TVS                                                                                                     | 39                         | 41  | N/A  | Persistent or Permanent AF                                                 |
| 14 | Henn et al. 2015        | Cohort retrospective                                         | United States | 109         | N/A                  | N/A          | N/A           | N/A          | N/A     | N/A      | 2002-2014    | 12-60                                                              | Radiofrequency                             | PVI, LAA, RAA                          | MVR, DVR, TVP                                                                                               | 61                         | 48  | N/A  | Persistent or Paroxysmal or Non paroxysmal AF                              |
| 15 | Albage et al. 2010      | Prospective clinical studies                                 | Sweden        | 115         | 64.9 ± 10.4          | 66.9 ± 6.7   | N/A           | 34/10        | 54/17   | N/A      | 2005-2010    | 1-12                                                               | Cryoablation                               | PVI, PW, MI, LAA, Maze III             | AVS, CABG, MVS, TVS                                                                                         | 44                         | 71  | N/A  | Paroxysmal, persistent, or permanent AF                                    |
| 16 | McCarthy et al. 2010    | Prospective clinical studies                                 | United States | 316         | 66.7 ± 10.3          | 66.8 ± 12.1  | 73.0 ± 10.7   | 42/88        | 13/22   | 41/9     | 2004-2008    | 5-24                                                               | Cut and sew, radiofrequency, Cryoablation  | PVI, LAA, RAA, TC                      | AVR, MVR, TVP, CABG                                                                                         | 91                         | 175 | 50   | Paroxysmal, persistent, or permanent AF                                    |
| 17 | Guden et al. 2003       | Cohort prospective                                           | Turkey        | 105         | 52 ± 11              | 54 ± 9       | N/A           | 14/34        | 23/34   | N/A      | 2001         | 2-24                                                               | Radiofrequency                             | PVI, PW, MI, LAA, Maze III             | AVS,CABG, MVS, TVS                                                                                          | 48                         | 57  | N/A  | Permanent or persistent AF                                                 |
| 18 | Pecha et al. 2014a      | Nonrandomized retrospective study, Cohort                    | Germany       | 594         | 59 ± 28              | 58 ± 12      | N/A           | 54           | 116     | N/A      | 2003-2012    | 1                                                                  | Radiofrequency and cryoablation            | LVI, LAA, BLI, CI, RAA, TC             | AVS, MVS, TVS, CABG                                                                                         | 131                        | 463 | N/A  | Paroxysmal, persistent, or permanent AF                                    |
| 19 | Gualis et al. 2016      | nonrandomized retrospective study, Cohort                    | Spain         | 150         | 65.1 ± 10.2          | 71.6 ± 6.8   | N/A           | 29/38        | 39/44   | N/A      | 2006-2011    | 36                                                                 | Cryoablation                               | PVI, LAA, RAA, TC, CS, WG              | AVS, MVS, TVS                                                                                               | 67                         | 83  | N/A  | Paroxysmal, persistent, or permanent AF                                    |
| 20 | Denke et al. 2009       | Nonrandomized retrospective study, Cohort                    | Germany       | 130         | 53.4 ± 10.8          | 54.2 ± 10.1  | N/A           | 54/10        | 62/4    | N/A      | 1998-2004    | 51 ± 13                                                            | Radiofrequency                             | PVI, PW, MI, LAA, Maze III             | MVS, AVS, CABG                                                                                              | 64                         | 66  | N/A  | Paroxysmal, persistent, or permanent AF                                    |
| 21 | Pecha et al. 2014b      | nonrandomized retrospective study, Cohort                    | Germany       | 132         | 70.5 ± 7.3           | 70.1 ± 7.5   | N/A           | 45/11        | 40/26   | N/A      | 2008-2011    | 12                                                                 | Radiofrequency and cryoablation            | LVI, LAA, CI, RAA, TC                  | AVS,CABG, MVS, TVS                                                                                          | 66                         | 66  | N/A  | Paroxysmal, persistent, or permanent AF                                    |
| 22 | Soni et al. 2013        | nonrandomized retrospective study, Cohort                    | United States | 305         | 59 ± 28              | 68 ± 12      | N/A           | 54/37        | 116/98  | N/A      | 2007-2011    | 12                                                                 | Radiofrequency, microwave and cryoablation | PVI, PW, MI, LAA, MM                   | AVS, MVS, CABG, TVS                                                                                         | 91                         | 214 | N/A  | Paroxysmal, persistent, or permanent AF                                    |
| 23 | Kim et al. 2011         | nonrandomized retrospective study, Cohort                    | South Korea   | 284         | 56.3 ± 12.0          | 52.1 ± 11.9  | N/A           | 75/124       | 47/38   | N/A      | 2006-2009    | 26.0 ± 13.3                                                        | Cryoablation                               | PVI, PW, MI, LAA, MM, CS               | AVS,CABG, MVS, TVS                                                                                          | 199                        | 85  | N/A  | Paroxysmal, persistent, or permanent AF                                    |
| 24 | Breda et al. 2011       | nonrandomized retrospective study, Cohort                    | Brazil        | 30          | 60.0 ± 8.07          | 46.3 ± 9.54  | N/A           | 9/6          | 5/10    | N/A      | 2003-2009    | 12.16 ± 10.89                                                      | Radiofrequency                             | PVI, PW, MI, LAA, MM                   | MVS                                                                                                         | 15                         | 15  | N/A  | Permanent or persistent AF                                                 |
| 25 | Denke et al. 2007       | Randomized Controlled Trial                                  | Germany       | 222         | N/A                  | N/A          | N/A           | N/A          | N/A     | N/A      | 1997-2006    | 21                                                                 | Radiofrequency                             | PVI, MV, LAA, RAA, MM                  | AVS,CABG, MVS                                                                                               | 106                        | 116 | N/A  | Paroxysmal, persistent, or permanent AF                                    |
| 26 | Ryan et al. 2004        | Non-randomized retrospective study, Cohort                   | United States | 58          | N/A                  | N/A          | N/A           | N/A          | N/A     | N/A      | 1986-2003    | 19.8 ± 25                                                          | Cut and sew, radiofrequency, cryoablation  | PVI, PW, MI, LAA, Maze III             | AVS,CABG, MVS, TVS                                                                                          | 36                         | 7   | 15   | Paroxysmal, persistent, or permanent AF                                    |
| 27 | Takami et al. 2019      | Non-randomized retrospective study, Cohort                   | Japan         | 50          | 54.7 ± 8.8           | 58.3 ± 8.7   | N/A           | 11/19        | 9/11    | N/A      | N/A          | 8-51                                                               | Cut and sew, radiofrequency, cryoablation  | PVI, PW, MI, LAA, CTI, Maze III        | AVS,CABG, MVS, TVS                                                                                          | 30                         | 20  | N/A  | Paroxysmal, persistent, or permanent AF                                    |
| 28 | Takasaki et al. 2012    | Non-randomized retrospective study, Cohort                   | Japan         | 75          | 59.6 ± 9.5           | N/A          | 56.2 ± 7.3    | 17/18        | N/A     | 19/21    | 1999-2004    | >60                                                                | Cryoablation                               | PVI, LAA, RAA                          | AVS,CABG, MVS, TVS                                                                                          | 35                         | N/A | 40   | Paroxysmal or persistent AF                                                |
| 29 | Charitos et al. 2015    | Non-randomized retrospective study, Cohort                   | Germany       | 51          | N/A                  | N/A          | N/A           | N/A          | N/A     | N/A      | N/A          | 21 ± 13.92                                                         | Cryoablation                               | PVI, LAA, RAA                          | AVS,CABG, MVS, TVS                                                                                          | 29                         | 22  | N/A  | Paroxysmal, persistent, or long-lasting persistent                         |
| 30 | Chunyla et al. 2017     | Non-randomized retrospective study, Cohort                   | United States | 294         | 68.0 ± 11.6          | 67.7 ± 11.7  | N/A           | 73/74        | 77/70   | N/A      | 2004-2014    | 6-24                                                               | Radiofrequency, cryoablation               | LAA, RAA                               | MVS, TVS                                                                                                    | 147                        | 147 | N/A  | Paroxysmal, persistent, or permanent AF                                    |
| 31 | Niv Ad et al. 2017      | Randomized controlled clinical trial                         | United States | 186         | 70.7 ± 8.3           | 70.3 ± 9.5   | N/A           | 72/21        | 71/22   | N/A      | 2005-2015    | 6-24                                                               | Cut and sew, radiofrequency, cryoablation  | PVI, LAA, RAA                          | AVS,CABG, MVS                                                                                               | 93                         | 93  | N/A  | Paroxysmal AF                                                              |
| 32 | Yang et al. 2017        | Non-randomized retrospective study, Cohort                   | China         | 129         | 47.3 ± 9.9           | 52.5 ± 10.3  | N/A           | 32/62        | 10/25   | N/A      | 2006-2015    | 6-72                                                               | Radiofrequency, cryoablation               | PVI, LAA, RAA                          | MVS, TVS                                                                                                    | 94                         | 35  | N/A  | Long-standing persistent AF                                                |
| 33 | Takai et al. 2017       | Non-randomized retrospective study, Cohort                   | Japan         | 3342        | 70 ± 9.5             | 70 ± 11      | 72 ± 9.1      | 905/434      | 160/106 | 1140/657 | 2012         | 6-14                                                               | Cut and sew, radiofrequency, cryoablation  | PVI, LAA, RAA                          | CABG                                                                                                        | 1339                       | 266 | 1797 | Paroxysmal AF and persistent AF                                            |
| 34 | Bogachev et al. 2018    | Prospective, Randomised Cohort                               | Russia        | 140         | 51.4 ± 69.8          | 50.9 ± 69.2  | N/A           | 26/45        | 27/43   | N/A      | 2014-2017    | 24                                                                 | Radiofrequency, cryoablation               | PVI, LAA, RAA                          | MVS                                                                                                         | 70                         | 70  | N/A  | Paroxysmal AF                                                              |
| 35 | Yoshihawa et al. 2006   | Retrospective Cohort                                         | Japan         | 100         | 58.7 ± 9.1           | 60.3 ± 10.0  | N/A           | 20/9         | 36/35   | N/A      | 1997-2004    | N/A                                                                | Radiofrequency and cryoablation            | LAA and BAA with modified Cox-Maze III | AVR,AVI,MVR,MVr and CABG                                                                                    | 29                         | 71  | N/A  | Persistent or Permanent AF                                                 |
| 36 | Kalybkova et al. 2021   | Prospective Randomized Trial                                 | Russia        | 116         | 65 [61; 67.75]       | 62 [56; 66]  | N/A           | 48/10        | 49/9    | N/A      | 2016-2020    | 1, 2, 12, 24, 60                                                   | cut and sew                                | Cox-Maze IV, LAA, RAA, PVI             | CABG                                                                                                        | 58                         | 58  | N/A  | Persistent AF                                                              |
| 37 | DeRose, Jr et al. 2019  | Randomized Controlled Trial                                  | Canada        | 128         | N/A                  | N/A          | N/A           | N/A          | N/A     | N/A      | 2010-2013    | 12                                                                 | Radiofrequency and cryoablation            | LAA, RAA, PVI                          | MVS, CABG, AVS, TVS                                                                                         | 64                         | N/A | 62   | Persistent AF                                                              |
| 38 | De Lima et al. 2004     | Randomized Controlled Trial                                  | Brazil        | 20          | 50.1 ± 15.3          | N/A          | 54.1 ± 9.4    | 3/7          | N/A     | 3/7      | 1999-2001    | 2, 6, 12, 18, 24                                                   | Electrocoagulation, cut and sew            | Cox-Maze III, PVI                      | MVS                                                                                                         | 10                         | N/A | 10   | Permanent AF                                                               |
| 39 | Wang et al. 2014        | Prospective Randomized Trial                                 | China         | 210         | 53.1 ± 9.3           | 53.3 ± 10.3  | N/A           | 23/47        | 28/42   | N/A      | 2008-2011    | 3, 6, 12                                                           | Radiofrequency ablation                    | LAA, BAA                               | AVR, TVP, CABG                                                                                              | 70                         | 70  | N/A  | Chronic atrial fibrillation                                                |

Table S3. Postoperative Outcomes

[illegible]

### Table S4. Operative Procedure Time

[illegible]

**Table S4. Operative Procedure Time**

| No | Author, year           | Xc time (Mean+/-SD or Range) |              |          | CPB/ECC time (Mean+/-SD or Range) |              |          | Ablation time (Mean+/-SD or Range) |     |     |
|----|------------------------|------------------------------|--------------|----------|-----------------------------------|--------------|----------|------------------------------------|-----|-----|
|    |                        | BAA                          | LAA          | PVI      | BAA                               | LAA          | PVI      | BAA                                | LAA | PVI |
| 32 | Yang et al, 2017       | 92.3 ± 29.0                  | 88.2 ± 24.5  | N/A      | 151.8 ± 45.0                      | 145.4 ± 50.0 | N/A      | N/A                                | N/A | N/A |
| 33 | Takai et al, 2017      | 127 ± 50                     | 127 ± 52     | 109 ± 47 | 190 ± 67                          | 187 ± 80     | 171 ± 71 | N/A                                | N/A | N/A |
| 34 | Bogachev et al, 2018   | 107.9 ± 25.6                 | 131.8 ± 30.9 | N/A      | N/A                               | N/A          | N/A      | N/A                                | N/A | N/A |
| 35 | Yoshikawa et al, 2006  | 131 ± 41.7                   | 129 ± 34.2   | N/A      | 187.5 ± 44.6                      | 187.0 ± 48.6 | N//A     | N/A                                | N/A | N/A |
| 36 | Kalybekova et al, 2021 | N/A                          | N/A          | N/A      | N/A                               | N/A          | N/A      | N/A                                | N/A | N/A |
| 37 | DeRose, Jr et al, 2019 | N/A                          | N/A          | N/A      | N/A                               | N/A          | N/A      | N/A                                | N/A | N/A |
| 38 | De Lima et al, 2004    | N/A                          | N/A          | N/A      | 115.3 ± 25                        | N/A          | 97.8 ± 3 | N/A                                | N/A | N/A |
| 39 | Wang et al, 2014       | N/A                          | N/A          | N/A      | 138.2 ± 46.0                      | 101.0 ± 34.0 | N/A      | N/A                                | N/A | N/A |

**Table S5. Hospital Admissions and Stay**

| No | Author, year           | Hospital stay |            |            | Hospital Redmissions |           |         |
|----|------------------------|---------------|------------|------------|----------------------|-----------|---------|
|    |                        | BAA           | LAA        | PVI        | BAA                  | LAA       | PVI     |
| 1  | Hald et al, 2021       | N/A           | N/A        | N/A        | N/A                  | N/A       | N/A     |
| 2  | Albrecht et al, 2009   | N/A           | N/A        | N/A        | N/A                  | N/A       | N/A     |
| 3  | Srivastava et al, 2008 | N/A           | N/A        | N/A        | N/A                  | N/A       | N/A     |
| 4  | Stulak et al, 2014     | N/A           | N/A        | N/A        | N/A                  | N/A       | N/A     |
| 5  | Onorati et al, 2011    | N/A           | N/A        | N/A        | 14 (12.8)            | 13 (40.6) | N/A     |
| 6  | Alexander et al, 2018  | N/A           | N/A        | N/A        | N/A                  | N/A       | N/A     |
| 7  | Gauzebroek et al, 2008 | 13.2 ± 6.0    | 10.7 ± 3.2 | 11.1 ± 5.6 | N/A                  | N/A       | N/A     |
| 8  | Ghadivel et al, 2008   | N/A           | N/A        | N/A        | 10 (40.0)            | 25 (38.5) | N/A     |
| 9  | Gillinov et al, 2015   | N/A           | N/A        | N/A        | N/A                  | N/A       | N/A     |
| 10 | Yildirim et al, 2022   | N/A           | N/A        | N/A        | N/A                  | N/A       | N/A     |
| 11 | Wynn et al, 2016       | N/A           | N/A        | N/A        | 6(9.5)               | N/A       | 5 (8.2) |
| 12 | Wang et al, 2009       | N/A           | N/A        | N/A        | N/A                  | N/A       | N/A     |
| 13 | Calo et al, 2006       | N/A           | N/A        | N/A        | N/A                  | N/A       | N/A     |
| 14 | Henn et al, 2015       | N/A           | N/A        | N/A        | N/A                  | N/A       | N/A     |
| 15 | Albage et al, 2011     | N/A           | N/A        | N/A        | N/A                  | N/A       | N/A     |
| 16 | McCarthy et al, 2010   | N/A           | N/A        | N/A        | N/A                  | N/A       | N/A     |
| 17 | Guden et al, 2003      | N/A           | N/A        | N/A        | N/A                  | N/A       | N/A     |
| 18 | Pecha et al, 2014a     | N/A           | N/A        | N/A        | N/A                  | N/A       | N/A     |
| 19 | Gualis et al, 2016     | N/A           | N/A        | N/A        | N/A                  | N/A       | N/A     |
| 20 | Deneke et al, 2009     | N/A           | N/A        | N/A        | N/A                  | N/A       | N/A     |
| 21 | Pecha et al, 2014b     | N/A           | N/A        | N/A        | N/A                  | N/A       | N/A     |
| 22 | Soni et al, 2013       | 11.2 ± 10.9   | 10.5 ± 9.1 | N/A        | N/A                  | N/A       | N/A     |
| 23 | Kim et al, 2011        | N/A           | N/A        | N/A        | 1 (0.5)              | 0 (0.0)   | N/A     |
| 24 | Breda et al, 2011      | N/A           | N/A        | N/A        | N/A                  | N/A       | N/A     |
| 25 | Deneke et al, 2007     | N/A           | N/A        | N/A        | N/A                  | N/A       | N/A     |
| 26 | Ryan et al, 2004       | N/A           | N/A        | N/A        | N/A                  | N/A       | N/A     |
| 27 | Takami et al, 2019     | N/A           | N/A        | N/A        | N/A                  | N/A       | N/A     |
| 28 | Takasaki et al, 2012   | N/A           | N/A        | N/A        | N/A                  | N/A       | N/A     |

**Table S5. Hospital Admissions and Stay**

| No | Author, year           | Hospital stay |          |         | Hospital Redmissions |           |     |
|----|------------------------|---------------|----------|---------|----------------------|-----------|-----|
|    |                        | BAA           | LAA      | PVI     | BAA                  | LAA       | PVI |
| 29 | Charitos et al, 2015   | N/A           | N/A      | N/A     | N/A                  | N/A       | N/A |
| 30 | Churyla et al, 2017    | 7 (5–10)      | 7 (6–10) | N/A     | N/A                  | N/A       | N/A |
| 31 | Niv Ad et al, 2017     | N/A           | 6 (4-8)  | N/A     | N/A                  | 17 (18.3) | N/A |
| 32 | Yang et al, 2017       | N/A           | N/A      | N/A     | N/A                  | N/A       | N/A |
| 33 | Takai et al, 2017      | 27 ± 27       | 29 ± 33  | 28 ± 29 | N/A                  | N/A       | N/A |
| 34 | Bogachev et al, 2018   | N/A           | N/A      | N/A     | N/A                  | N/A       | N/A |
| 35 | Yoshikawa et al, 2006  | N/A           | N/A      | N/A     | N/A                  | N/A       | N/A |
| 36 | Kalybekova et al, 2021 | N/A           | N/A      | N/A     | N/A                  | N/A       | N/A |
| 37 | DeRose, Jr et al, 2019 | N/A           | N/A      | N/A     | N/A                  | N/A       | N/A |
| 38 | De Lima et al, 2004    | N/A           | N/A      | N/A     | N/A                  | N/A       | N/A |
| 39 | Wang et al, 2014       | N/A           | N/A      | N/A     | N/A                  | N/A       | N/A |



**Figure S1. Overall postoperative outcomes**

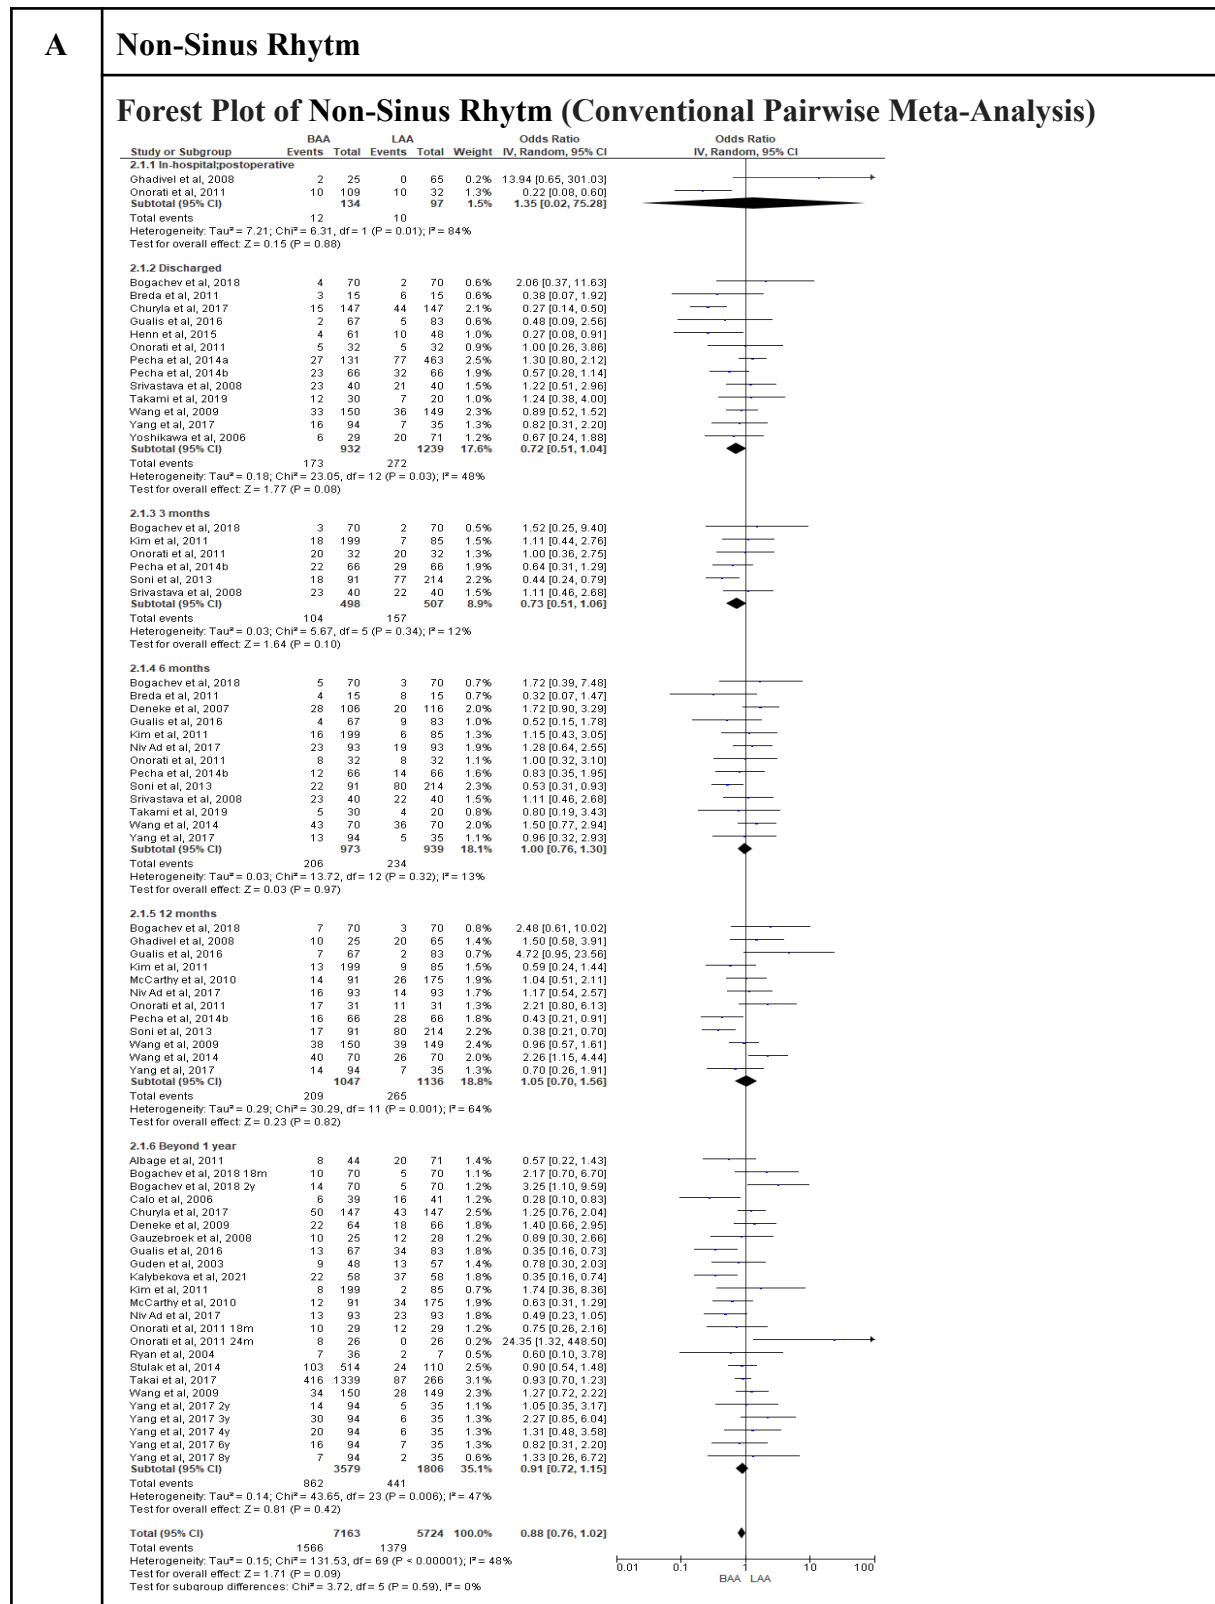

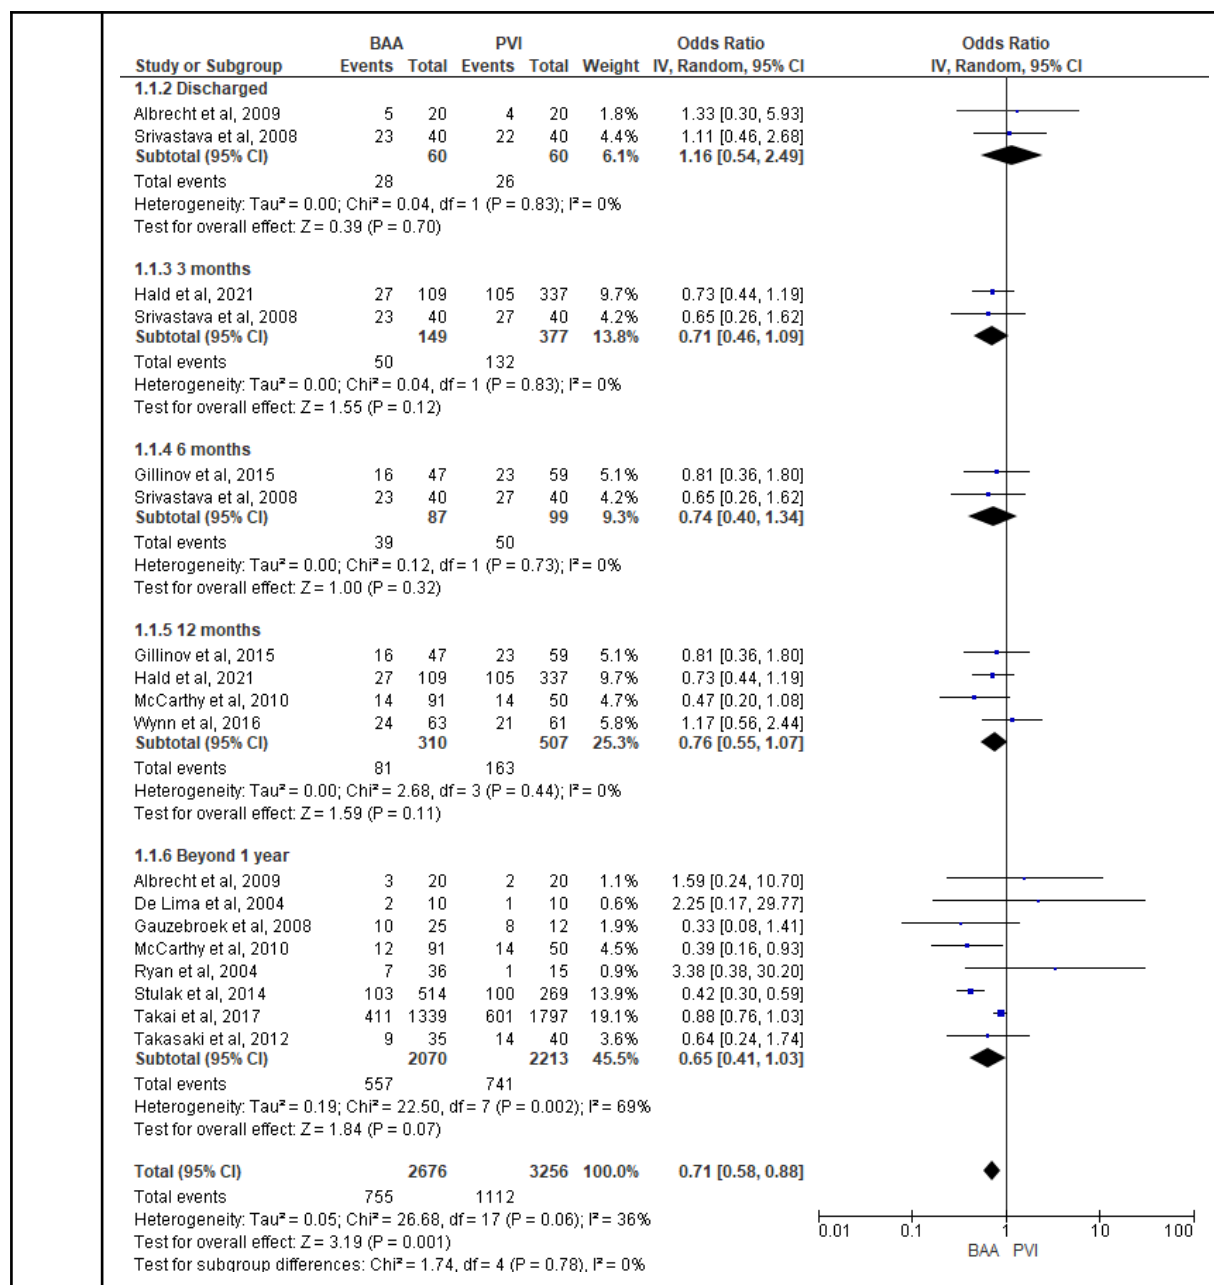

| Study or Subgroup                                                                          | LAA         |             | PVI           |       | Weight | Odds Ratio<br>IV, Random, 95% CI | Odds Ratio<br>IV, Random, 95% CI |
|--------------------------------------------------------------------------------------------|-------------|-------------|---------------|-------|--------|----------------------------------|----------------------------------|
|                                                                                            | Events      | Total       | Events        | Total |        |                                  |                                  |
| <b>3.1.2 Discharged</b>                                                                    |             |             |               |       |        |                                  |                                  |
| Alexander et al, 2018                                                                      | 6           | 25          | 17            | 27    | 4.4%   | 0.19 [0.06, 0.62]                |                                  |
| Srivastava et al, 2008                                                                     | 21          | 40          | 20            | 40    | 6.8%   | 1.11 [0.46, 2.66]                |                                  |
| Yildirim et al, 2022                                                                       | 29          | 86          | 58            | 182   | 10.9%  | 1.09 [0.63, 1.88]                |                                  |
| <b>Subtotal (95% CI)</b>                                                                   | <b>151</b>  | <b>249</b>  | <b>22.1%</b>  |       |        | <b>0.69 [0.27, 1.74]</b>         |                                  |
| Total events                                                                               | 56          |             | 95            |       |        |                                  |                                  |
| Heterogeneity: $\tau^2 = 0.48$ ; $\chi^2 = 7.24$ , $df = 2$ ( $P = 0.03$ ); $I^2 = 72\%$   |             |             |               |       |        |                                  |                                  |
| Test for overall effect: $Z = 0.79$ ( $P = 0.43$ )                                         |             |             |               |       |        |                                  |                                  |
| <b>3.1.3 3 months</b>                                                                      |             |             |               |       |        |                                  |                                  |
| Srivastava et al, 2008                                                                     | 23          | 40          | 22            | 40    | 6.7%   | 1.11 [0.46, 2.68]                |                                  |
| Yildirim et al, 2022                                                                       | 23          | 86          | 55            | 182   | 10.5%  | 0.84 [0.48, 1.49]                |                                  |
| <b>Subtotal (95% CI)</b>                                                                   | <b>126</b>  | <b>222</b>  | <b>17.2%</b>  |       |        | <b>0.91 [0.57, 1.48]</b>         |                                  |
| Total events                                                                               | 46          |             | 77            |       |        |                                  |                                  |
| Heterogeneity: $\tau^2 = 0.00$ ; $\chi^2 = 0.26$ , $df = 1$ ( $P = 0.61$ ); $I^2 = 0\%$    |             |             |               |       |        |                                  |                                  |
| Test for overall effect: $Z = 0.37$ ( $P = 0.71$ )                                         |             |             |               |       |        |                                  |                                  |
| <b>3.1.4 6 months</b>                                                                      |             |             |               |       |        |                                  |                                  |
| Srivastava et al, 2008                                                                     | 23          | 40          | 22            | 40    | 0.0%   | 1.11 [0.46, 2.68]                |                                  |
| <b>Subtotal (95% CI)</b>                                                                   | <b>0</b>    | <b>0</b>    |               |       |        | <b>Not estimable</b>             |                                  |
| Total events                                                                               | 0           |             | 0             |       |        |                                  |                                  |
| Heterogeneity: Not applicable                                                              |             |             |               |       |        |                                  |                                  |
| Test for overall effect: Not applicable                                                    |             |             |               |       |        |                                  |                                  |
| <b>3.1.5 12 months</b>                                                                     |             |             |               |       |        |                                  |                                  |
| McCarthy et al, 2010                                                                       | 26          | 175         | 14            | 50    | 8.2%   | 0.45 [0.21, 0.94]                |                                  |
| Yildirim et al, 2022                                                                       | 21          | 86          | 55            | 182   | 10.3%  | 0.75 [0.42, 1.34]                |                                  |
| <b>Subtotal (95% CI)</b>                                                                   | <b>261</b>  | <b>232</b>  | <b>18.5%</b>  |       |        | <b>0.61 [0.38, 0.99]</b>         |                                  |
| Total events                                                                               | 47          |             | 69            |       |        |                                  |                                  |
| Heterogeneity: $\tau^2 = 0.01$ ; $\chi^2 = 1.11$ , $df = 1$ ( $P = 0.29$ ); $I^2 = 10\%$   |             |             |               |       |        |                                  |                                  |
| Test for overall effect: $Z = 1.98$ ( $P = 0.05$ )                                         |             |             |               |       |        |                                  |                                  |
| <b>3.1.6 Beyond 1 year</b>                                                                 |             |             |               |       |        |                                  |                                  |
| Alexander et al, 2018                                                                      | 2           | 25          | 12            | 27    | 2.7%   | 0.11 [0.02, 0.56]                |                                  |
| Gauzebroek et al, 2008                                                                     | 12          | 28          | 8             | 12    | 3.4%   | 0.38 [0.09, 1.54]                |                                  |
| McCarthy et al, 2010                                                                       | 34          | 175         | 14            | 50    | 8.5%   | 0.62 [0.30, 1.28]                |                                  |
| Ryan et al, 2004                                                                           | 2           | 7           | 1             | 15    | 1.2%   | 5.60 [0.41, 76.05]               |                                  |
| Stulak et al, 2014                                                                         | 24          | 110         | 100           | 269   | 11.3%  | 0.47 [0.28, 0.79]                |                                  |
| Takai et al, 2017                                                                          | 87          | 266         | 601           | 1797  | 15.2%  | 0.97 [0.74, 1.27]                |                                  |
| <b>Subtotal (95% CI)</b>                                                                   | <b>611</b>  | <b>2170</b> | <b>42.3%</b>  |       |        | <b>0.59 [0.33, 1.04]</b>         |                                  |
| Total events                                                                               | 161         |             | 736           |       |        |                                  |                                  |
| Heterogeneity: $\tau^2 = 0.26$ ; $\chi^2 = 15.22$ , $df = 5$ ( $P = 0.009$ ); $I^2 = 67\%$ |             |             |               |       |        |                                  |                                  |
| Test for overall effect: $Z = 1.84$ ( $P = 0.07$ )                                         |             |             |               |       |        |                                  |                                  |
| <b>Total (95% CI)</b>                                                                      | <b>1149</b> | <b>2873</b> | <b>100.0%</b> |       |        | <b>0.69 [0.52, 0.93]</b>         |                                  |
| Total events                                                                               | 310         |             | 977           |       |        |                                  |                                  |
| Heterogeneity: $\tau^2 = 0.13$ ; $\chi^2 = 25.52$ , $df = 12$ ( $P = 0.01$ ); $I^2 = 53\%$ |             |             |               |       |        |                                  |                                  |
| Test for overall effect: $Z = 2.48$ ( $P = 0.01$ )                                         |             |             |               |       |        |                                  |                                  |
| Test for subgroup differences: $\chi^2 = 1.84$ , $df = 3$ ( $P = 0.61$ ), $I^2 = 0\%$      |             |             |               |       |        |                                  |                                  |

| Study or Subgroup                                                                                                                                                                                                                                                                                                                                                                                                                                                                                                                                                                                                                                                                                                                                                                                                                                                                                                                                                                                                                                                                                                                                                                                                                                                                                                                                                                               | BAA         |             | Control       |       | Weight | Odds Ratio<br>IV, Random, 95% CI | Odds Ratio<br>IV, Random, 95% CI |                   |     |  |     |  |        |                                  |                                  |        |       |        |       |                        |   |    |   |    |       |                    |  |                        |   |    |   |    |      |                    |  |                    |   |     |   |     |       |                   |  |                       |            |            |               |  |  |                          |  |              |    |   |  |  |  |  |  |                                                                                         |  |  |  |  |  |  |  |                                                    |  |  |  |  |  |  |  |
|-------------------------------------------------------------------------------------------------------------------------------------------------------------------------------------------------------------------------------------------------------------------------------------------------------------------------------------------------------------------------------------------------------------------------------------------------------------------------------------------------------------------------------------------------------------------------------------------------------------------------------------------------------------------------------------------------------------------------------------------------------------------------------------------------------------------------------------------------------------------------------------------------------------------------------------------------------------------------------------------------------------------------------------------------------------------------------------------------------------------------------------------------------------------------------------------------------------------------------------------------------------------------------------------------------------------------------------------------------------------------------------------------|-------------|-------------|---------------|-------|--------|----------------------------------|----------------------------------|-------------------|-----|--|-----|--|--------|----------------------------------|----------------------------------|--------|-------|--------|-------|------------------------|---|----|---|----|-------|--------------------|--|------------------------|---|----|---|----|------|--------------------|--|--------------------|---|-----|---|-----|-------|-------------------|--|-----------------------|------------|------------|---------------|--|--|--------------------------|--|--------------|----|---|--|--|--|--|--|-----------------------------------------------------------------------------------------|--|--|--|--|--|--|--|----------------------------------------------------|--|--|--|--|--|--|--|
|                                                                                                                                                                                                                                                                                                                                                                                                                                                                                                                                                                                                                                                                                                                                                                                                                                                                                                                                                                                                                                                                                                                                                                                                                                                                                                                                                                                                 | Events      | Total       | Events        | Total |        |                                  |                                  |                   |     |  |     |  |        |                                  |                                  |        |       |        |       |                        |   |    |   |    |       |                    |  |                        |   |    |   |    |      |                    |  |                    |   |     |   |     |       |                   |  |                       |            |            |               |  |  |                          |  |              |    |   |  |  |  |  |  |                                                                                         |  |  |  |  |  |  |  |                                                    |  |  |  |  |  |  |  |
| <b>1.1.1 BAA vs LAA</b>                                                                                                                                                                                                                                                                                                                                                                                                                                                                                                                                                                                                                                                                                                                                                                                                                                                                                                                                                                                                                                                                                                                                                                                                                                                                                                                                                                         |             |             |               |       |        |                                  |                                  |                   |     |  |     |  |        |                                  |                                  |        |       |        |       |                        |   |    |   |    |       |                    |  |                        |   |    |   |    |      |                    |  |                    |   |     |   |     |       |                   |  |                       |            |            |               |  |  |                          |  |              |    |   |  |  |  |  |  |                                                                                         |  |  |  |  |  |  |  |                                                    |  |  |  |  |  |  |  |
| Albage et al, 2011                                                                                                                                                                                                                                                                                                                                                                                                                                                                                                                                                                                                                                                                                                                                                                                                                                                                                                                                                                                                                                                                                                                                                                                                                                                                                                                                                                              | 5           | 44          | 6             | 71    | 4.0%   | 1.39 [0.40, 4.85]                |                                  |                   |     |  |     |  |        |                                  |                                  |        |       |        |       |                        |   |    |   |    |       |                    |  |                        |   |    |   |    |      |                    |  |                    |   |     |   |     |       |                   |  |                       |            |            |               |  |  |                          |  |              |    |   |  |  |  |  |  |                                                                                         |  |  |  |  |  |  |  |                                                    |  |  |  |  |  |  |  |
| Bogachev et al, 2018                                                                                                                                                                                                                                                                                                                                                                                                                                                                                                                                                                                                                                                                                                                                                                                                                                                                                                                                                                                                                                                                                                                                                                                                                                                                                                                                                                            | 8           | 70          | 4             | 70    | 4.0%   | 2.13 [0.61, 7.43]                |                                  |                   |     |  |     |  |        |                                  |                                  |        |       |        |       |                        |   |    |   |    |       |                    |  |                        |   |    |   |    |      |                    |  |                    |   |     |   |     |       |                   |  |                       |            |            |               |  |  |                          |  |              |    |   |  |  |  |  |  |                                                                                         |  |  |  |  |  |  |  |                                                    |  |  |  |  |  |  |  |
| Churyla et al, 2017                                                                                                                                                                                                                                                                                                                                                                                                                                                                                                                                                                                                                                                                                                                                                                                                                                                                                                                                                                                                                                                                                                                                                                                                                                                                                                                                                                             | 19          | 147         | 10            | 147   | 9.7%   | 2.03 [0.91, 4.54]                |                                  |                   |     |  |     |  |        |                                  |                                  |        |       |        |       |                        |   |    |   |    |       |                    |  |                        |   |    |   |    |      |                    |  |                    |   |     |   |     |       |                   |  |                       |            |            |               |  |  |                          |  |              |    |   |  |  |  |  |  |                                                                                         |  |  |  |  |  |  |  |                                                    |  |  |  |  |  |  |  |
| Gauzebroek et al, 2008                                                                                                                                                                                                                                                                                                                                                                                                                                                                                                                                                                                                                                                                                                                                                                                                                                                                                                                                                                                                                                                                                                                                                                                                                                                                                                                                                                          | 16          | 25          | 8             | 28    | 4.7%   | 4.44 [1.40, 14.14]               |                                  |                   |     |  |     |  |        |                                  |                                  |        |       |        |       |                        |   |    |   |    |       |                    |  |                        |   |    |   |    |      |                    |  |                    |   |     |   |     |       |                   |  |                       |            |            |               |  |  |                          |  |              |    |   |  |  |  |  |  |                                                                                         |  |  |  |  |  |  |  |                                                    |  |  |  |  |  |  |  |
| Guden et al, 2003                                                                                                                                                                                                                                                                                                                                                                                                                                                                                                                                                                                                                                                                                                                                                                                                                                                                                                                                                                                                                                                                                                                                                                                                                                                                                                                                                                               | 12          | 48          | 10            | 57    | 7.0%   | 1.57 [0.61, 4.03]                |                                  |                   |     |  |     |  |        |                                  |                                  |        |       |        |       |                        |   |    |   |    |       |                    |  |                        |   |    |   |    |      |                    |  |                    |   |     |   |     |       |                   |  |                       |            |            |               |  |  |                          |  |              |    |   |  |  |  |  |  |                                                                                         |  |  |  |  |  |  |  |                                                    |  |  |  |  |  |  |  |
| Kalybekova et al, 2021                                                                                                                                                                                                                                                                                                                                                                                                                                                                                                                                                                                                                                                                                                                                                                                                                                                                                                                                                                                                                                                                                                                                                                                                                                                                                                                                                                          | 6           | 58          | 3             | 58    | 3.0%   | 2.12 [0.50, 8.90]                |                                  |                   |     |  |     |  |        |                                  |                                  |        |       |        |       |                        |   |    |   |    |       |                    |  |                        |   |    |   |    |      |                    |  |                    |   |     |   |     |       |                   |  |                       |            |            |               |  |  |                          |  |              |    |   |  |  |  |  |  |                                                                                         |  |  |  |  |  |  |  |                                                    |  |  |  |  |  |  |  |
| Kim et al, 2011                                                                                                                                                                                                                                                                                                                                                                                                                                                                                                                                                                                                                                                                                                                                                                                                                                                                                                                                                                                                                                                                                                                                                                                                                                                                                                                                                                                 | 3           | 199         | 0             | 85    | 0.7%   | 3.05 [0.16, 59.61]               |                                  |                   |     |  |     |  |        |                                  |                                  |        |       |        |       |                        |   |    |   |    |       |                    |  |                        |   |    |   |    |      |                    |  |                    |   |     |   |     |       |                   |  |                       |            |            |               |  |  |                          |  |              |    |   |  |  |  |  |  |                                                                                         |  |  |  |  |  |  |  |                                                    |  |  |  |  |  |  |  |
| Pecha et al, 2014 (A)                                                                                                                                                                                                                                                                                                                                                                                                                                                                                                                                                                                                                                                                                                                                                                                                                                                                                                                                                                                                                                                                                                                                                                                                                                                                                                                                                                           | 15          | 131         | 26            | 463   | 14.0%  | 2.17 [1.11, 4.24]                |                                  |                   |     |  |     |  |        |                                  |                                  |        |       |        |       |                        |   |    |   |    |       |                    |  |                        |   |    |   |    |      |                    |  |                    |   |     |   |     |       |                   |  |                       |            |            |               |  |  |                          |  |              |    |   |  |  |  |  |  |                                                                                         |  |  |  |  |  |  |  |                                                    |  |  |  |  |  |  |  |
| Pecha et al, 2014 (B)                                                                                                                                                                                                                                                                                                                                                                                                                                                                                                                                                                                                                                                                                                                                                                                                                                                                                                                                                                                                                                                                                                                                                                                                                                                                                                                                                                           | 7           | 66          | 4             | 66    | 3.8%   | 1.84 [0.51, 6.61]                |                                  |                   |     |  |     |  |        |                                  |                                  |        |       |        |       |                        |   |    |   |    |       |                    |  |                        |   |    |   |    |      |                    |  |                    |   |     |   |     |       |                   |  |                       |            |            |               |  |  |                          |  |              |    |   |  |  |  |  |  |                                                                                         |  |  |  |  |  |  |  |                                                    |  |  |  |  |  |  |  |
| Soni et al, 2013                                                                                                                                                                                                                                                                                                                                                                                                                                                                                                                                                                                                                                                                                                                                                                                                                                                                                                                                                                                                                                                                                                                                                                                                                                                                                                                                                                                | 15          | 91          | 16            | 214   | 11.1%  | 2.44 [1.15, 5.18]                |                                  |                   |     |  |     |  |        |                                  |                                  |        |       |        |       |                        |   |    |   |    |       |                    |  |                        |   |    |   |    |      |                    |  |                    |   |     |   |     |       |                   |  |                       |            |            |               |  |  |                          |  |              |    |   |  |  |  |  |  |                                                                                         |  |  |  |  |  |  |  |                                                    |  |  |  |  |  |  |  |
| Srivastava et al, 2008                                                                                                                                                                                                                                                                                                                                                                                                                                                                                                                                                                                                                                                                                                                                                                                                                                                                                                                                                                                                                                                                                                                                                                                                                                                                                                                                                                          | 0           | 40          | 1             | 40    | 0.6%   | 0.33 [0.01, 8.22]                |                                  |                   |     |  |     |  |        |                                  |                                  |        |       |        |       |                        |   |    |   |    |       |                    |  |                        |   |    |   |    |      |                    |  |                    |   |     |   |     |       |                   |  |                       |            |            |               |  |  |                          |  |              |    |   |  |  |  |  |  |                                                                                         |  |  |  |  |  |  |  |                                                    |  |  |  |  |  |  |  |
| Stulak et al, 2014                                                                                                                                                                                                                                                                                                                                                                                                                                                                                                                                                                                                                                                                                                                                                                                                                                                                                                                                                                                                                                                                                                                                                                                                                                                                                                                                                                              | 12          | 514         | 3             | 110   | 3.8%   | 0.85 [0.24, 3.07]                |                                  |                   |     |  |     |  |        |                                  |                                  |        |       |        |       |                        |   |    |   |    |       |                    |  |                        |   |    |   |    |      |                    |  |                    |   |     |   |     |       |                   |  |                       |            |            |               |  |  |                          |  |              |    |   |  |  |  |  |  |                                                                                         |  |  |  |  |  |  |  |                                                    |  |  |  |  |  |  |  |
| Takami et al, 2019                                                                                                                                                                                                                                                                                                                                                                                                                                                                                                                                                                                                                                                                                                                                                                                                                                                                                                                                                                                                                                                                                                                                                                                                                                                                                                                                                                              | 2           | 30          | 1             | 20    | 1.0%   | 1.36 [0.11, 16.05]               |                                  |                   |     |  |     |  |        |                                  |                                  |        |       |        |       |                        |   |    |   |    |       |                    |  |                        |   |    |   |    |      |                    |  |                    |   |     |   |     |       |                   |  |                       |            |            |               |  |  |                          |  |              |    |   |  |  |  |  |  |                                                                                         |  |  |  |  |  |  |  |                                                    |  |  |  |  |  |  |  |
| Wang et al, 2009                                                                                                                                                                                                                                                                                                                                                                                                                                                                                                                                                                                                                                                                                                                                                                                                                                                                                                                                                                                                                                                                                                                                                                                                                                                                                                                                                                                | 2           | 150         | 1             | 149   | 1.1%   | 2.00 [0.18, 22.30]               |                                  |                   |     |  |     |  |        |                                  |                                  |        |       |        |       |                        |   |    |   |    |       |                    |  |                        |   |    |   |    |      |                    |  |                    |   |     |   |     |       |                   |  |                       |            |            |               |  |  |                          |  |              |    |   |  |  |  |  |  |                                                                                         |  |  |  |  |  |  |  |                                                    |  |  |  |  |  |  |  |
| Wang et al, 2014                                                                                                                                                                                                                                                                                                                                                                                                                                                                                                                                                                                                                                                                                                                                                                                                                                                                                                                                                                                                                                                                                                                                                                                                                                                                                                                                                                                | 3           | 70          | 2             | 70    | 1.9%   | 1.52 [0.25, 9.40]                |                                  |                   |     |  |     |  |        |                                  |                                  |        |       |        |       |                        |   |    |   |    |       |                    |  |                        |   |    |   |    |      |                    |  |                    |   |     |   |     |       |                   |  |                       |            |            |               |  |  |                          |  |              |    |   |  |  |  |  |  |                                                                                         |  |  |  |  |  |  |  |                                                    |  |  |  |  |  |  |  |
| <b>Subtotal (95% CI)</b>                                                                                                                                                                                                                                                                                                                                                                                                                                                                                                                                                                                                                                                                                                                                                                                                                                                                                                                                                                                                                                                                                                                                                                                                                                                                                                                                                                        | <b>1683</b> | <b>1648</b> | <b>70.4%</b>  |       |        | <b>1.98 [1.47, 2.67]</b>         |                                  |                   |     |  |     |  |        |                                  |                                  |        |       |        |       |                        |   |    |   |    |       |                    |  |                        |   |    |   |    |      |                    |  |                    |   |     |   |     |       |                   |  |                       |            |            |               |  |  |                          |  |              |    |   |  |  |  |  |  |                                                                                         |  |  |  |  |  |  |  |                                                    |  |  |  |  |  |  |  |
| Total events                                                                                                                                                                                                                                                                                                                                                                                                                                                                                                                                                                                                                                                                                                                                                                                                                                                                                                                                                                                                                                                                                                                                                                                                                                                                                                                                                                                    | 125         | 95          |               |       |        |                                  |                                  |                   |     |  |     |  |        |                                  |                                  |        |       |        |       |                        |   |    |   |    |       |                    |  |                        |   |    |   |    |      |                    |  |                    |   |     |   |     |       |                   |  |                       |            |            |               |  |  |                          |  |              |    |   |  |  |  |  |  |                                                                                         |  |  |  |  |  |  |  |                                                    |  |  |  |  |  |  |  |
| Heterogeneity: $\tau^2 = 0.00$ ; $\chi^2 = 5.94$ , $df = 14$ ( $P = 0.97$ ); $I^2 = 0\%$                                                                                                                                                                                                                                                                                                                                                                                                                                                                                                                                                                                                                                                                                                                                                                                                                                                                                                                                                                                                                                                                                                                                                                                                                                                                                                        |             |             |               |       |        |                                  |                                  |                   |     |  |     |  |        |                                  |                                  |        |       |        |       |                        |   |    |   |    |       |                    |  |                        |   |    |   |    |      |                    |  |                    |   |     |   |     |       |                   |  |                       |            |            |               |  |  |                          |  |              |    |   |  |  |  |  |  |                                                                                         |  |  |  |  |  |  |  |                                                    |  |  |  |  |  |  |  |
| Test for overall effect: $Z = 4.49$ ( $P < 0.00001$ )                                                                                                                                                                                                                                                                                                                                                                                                                                                                                                                                                                                                                                                                                                                                                                                                                                                                                                                                                                                                                                                                                                                                                                                                                                                                                                                                           |             |             |               |       |        |                                  |                                  |                   |     |  |     |  |        |                                  |                                  |        |       |        |       |                        |   |    |   |    |       |                    |  |                        |   |    |   |    |      |                    |  |                    |   |     |   |     |       |                   |  |                       |            |            |               |  |  |                          |  |              |    |   |  |  |  |  |  |                                                                                         |  |  |  |  |  |  |  |                                                    |  |  |  |  |  |  |  |
| <b>1.1.2 BAA vs PVI</b>                                                                                                                                                                                                                                                                                                                                                                                                                                                                                                                                                                                                                                                                                                                                                                                                                                                                                                                                                                                                                                                                                                                                                                                                                                                                                                                                                                         |             |             |               |       |        |                                  |                                  |                   |     |  |     |  |        |                                  |                                  |        |       |        |       |                        |   |    |   |    |       |                    |  |                        |   |    |   |    |      |                    |  |                    |   |     |   |     |       |                   |  |                       |            |            |               |  |  |                          |  |              |    |   |  |  |  |  |  |                                                                                         |  |  |  |  |  |  |  |                                                    |  |  |  |  |  |  |  |
| De Lima et al, 2004                                                                                                                                                                                                                                                                                                                                                                                                                                                                                                                                                                                                                                                                                                                                                                                                                                                                                                                                                                                                                                                                                                                                                                                                                                                                                                                                                                             | 0           | 10          | 0             | 10    |        | Not estimable                    |                                  |                   |     |  |     |  |        |                                  |                                  |        |       |        |       |                        |   |    |   |    |       |                    |  |                        |   |    |   |    |      |                    |  |                    |   |     |   |     |       |                   |  |                       |            |            |               |  |  |                          |  |              |    |   |  |  |  |  |  |                                                                                         |  |  |  |  |  |  |  |                                                    |  |  |  |  |  |  |  |
| DeRose, Jr et al, 2019                                                                                                                                                                                                                                                                                                                                                                                                                                                                                                                                                                                                                                                                                                                                                                                                                                                                                                                                                                                                                                                                                                                                                                                                                                                                                                                                                                          | 16          | 64          | 10            | 62    | 8.0%   | 1.73 [0.72, 4.19]                |                                  |                   |     |  |     |  |        |                                  |                                  |        |       |        |       |                        |   |    |   |    |       |                    |  |                        |   |    |   |    |      |                    |  |                    |   |     |   |     |       |                   |  |                       |            |            |               |  |  |                          |  |              |    |   |  |  |  |  |  |                                                                                         |  |  |  |  |  |  |  |                                                    |  |  |  |  |  |  |  |
| Gauzebroek et al, 2008                                                                                                                                                                                                                                                                                                                                                                                                                                                                                                                                                                                                                                                                                                                                                                                                                                                                                                                                                                                                                                                                                                                                                                                                                                                                                                                                                                          | 16          | 25          | 2             | 12    | 2.1%   | 8.89 [1.59, 49.83]               |                                  |                   |     |  |     |  |        |                                  |                                  |        |       |        |       |                        |   |    |   |    |       |                    |  |                        |   |    |   |    |      |                    |  |                    |   |     |   |     |       |                   |  |                       |            |            |               |  |  |                          |  |              |    |   |  |  |  |  |  |                                                                                         |  |  |  |  |  |  |  |                                                    |  |  |  |  |  |  |  |
| Haid et al, 2021                                                                                                                                                                                                                                                                                                                                                                                                                                                                                                                                                                                                                                                                                                                                                                                                                                                                                                                                                                                                                                                                                                                                                                                                                                                                                                                                                                                | 13          | 109         | 20            | 337   | 11.6%  | 2.15 [1.03, 4.47]                |                                  |                   |     |  |     |  |        |                                  |                                  |        |       |        |       |                        |   |    |   |    |       |                    |  |                        |   |    |   |    |      |                    |  |                    |   |     |   |     |       |                   |  |                       |            |            |               |  |  |                          |  |              |    |   |  |  |  |  |  |                                                                                         |  |  |  |  |  |  |  |                                                    |  |  |  |  |  |  |  |
| Srivastava et al, 2008                                                                                                                                                                                                                                                                                                                                                                                                                                                                                                                                                                                                                                                                                                                                                                                                                                                                                                                                                                                                                                                                                                                                                                                                                                                                                                                                                                          | 0           | 40          | 0             | 40    |        | Not estimable                    |                                  |                   |     |  |     |  |        |                                  |                                  |        |       |        |       |                        |   |    |   |    |       |                    |  |                        |   |    |   |    |      |                    |  |                    |   |     |   |     |       |                   |  |                       |            |            |               |  |  |                          |  |              |    |   |  |  |  |  |  |                                                                                         |  |  |  |  |  |  |  |                                                    |  |  |  |  |  |  |  |
| Stulak et al, 2014                                                                                                                                                                                                                                                                                                                                                                                                                                                                                                                                                                                                                                                                                                                                                                                                                                                                                                                                                                                                                                                                                                                                                                                                                                                                                                                                                                              | 12          | 514         | 7             | 269   | 7.0%   | 0.89 [0.35, 2.30]                |                                  |                   |     |  |     |  |        |                                  |                                  |        |       |        |       |                        |   |    |   |    |       |                    |  |                        |   |    |   |    |      |                    |  |                    |   |     |   |     |       |                   |  |                       |            |            |               |  |  |                          |  |              |    |   |  |  |  |  |  |                                                                                         |  |  |  |  |  |  |  |                                                    |  |  |  |  |  |  |  |
| Takasaki et al, 2012                                                                                                                                                                                                                                                                                                                                                                                                                                                                                                                                                                                                                                                                                                                                                                                                                                                                                                                                                                                                                                                                                                                                                                                                                                                                                                                                                                            | 1           | 35          | 1             | 40    | 0.8%   | 1.15 [0.07, 19.05]               |                                  |                   |     |  |     |  |        |                                  |                                  |        |       |        |       |                        |   |    |   |    |       |                    |  |                        |   |    |   |    |      |                    |  |                    |   |     |   |     |       |                   |  |                       |            |            |               |  |  |                          |  |              |    |   |  |  |  |  |  |                                                                                         |  |  |  |  |  |  |  |                                                    |  |  |  |  |  |  |  |
| <b>Subtotal (95% CI)</b>                                                                                                                                                                                                                                                                                                                                                                                                                                                                                                                                                                                                                                                                                                                                                                                                                                                                                                                                                                                                                                                                                                                                                                                                                                                                                                                                                                        | <b>797</b>  | <b>770</b>  | <b>29.6%</b>  |       |        | <b>1.83 [1.01, 3.31]</b>         |                                  |                   |     |  |     |  |        |                                  |                                  |        |       |        |       |                        |   |    |   |    |       |                    |  |                        |   |    |   |    |      |                    |  |                    |   |     |   |     |       |                   |  |                       |            |            |               |  |  |                          |  |              |    |   |  |  |  |  |  |                                                                                         |  |  |  |  |  |  |  |                                                    |  |  |  |  |  |  |  |
| Total events                                                                                                                                                                                                                                                                                                                                                                                                                                                                                                                                                                                                                                                                                                                                                                                                                                                                                                                                                                                                                                                                                                                                                                                                                                                                                                                                                                                    | 58          | 40          |               |       |        |                                  |                                  |                   |     |  |     |  |        |                                  |                                  |        |       |        |       |                        |   |    |   |    |       |                    |  |                        |   |    |   |    |      |                    |  |                    |   |     |   |     |       |                   |  |                       |            |            |               |  |  |                          |  |              |    |   |  |  |  |  |  |                                                                                         |  |  |  |  |  |  |  |                                                    |  |  |  |  |  |  |  |
| Heterogeneity: $\tau^2 = 0.13$ ; $\chi^2 = 5.73$ , $df = 4$ ( $P = 0.22$ ); $I^2 = 30\%$                                                                                                                                                                                                                                                                                                                                                                                                                                                                                                                                                                                                                                                                                                                                                                                                                                                                                                                                                                                                                                                                                                                                                                                                                                                                                                        |             |             |               |       |        |                                  |                                  |                   |     |  |     |  |        |                                  |                                  |        |       |        |       |                        |   |    |   |    |       |                    |  |                        |   |    |   |    |      |                    |  |                    |   |     |   |     |       |                   |  |                       |            |            |               |  |  |                          |  |              |    |   |  |  |  |  |  |                                                                                         |  |  |  |  |  |  |  |                                                    |  |  |  |  |  |  |  |
| Test for overall effect: $Z = 1.99$ ( $P = 0.05$ )                                                                                                                                                                                                                                                                                                                                                                                                                                                                                                                                                                                                                                                                                                                                                                                                                                                                                                                                                                                                                                                                                                                                                                                                                                                                                                                                              |             |             |               |       |        |                                  |                                  |                   |     |  |     |  |        |                                  |                                  |        |       |        |       |                        |   |    |   |    |       |                    |  |                        |   |    |   |    |      |                    |  |                    |   |     |   |     |       |                   |  |                       |            |            |               |  |  |                          |  |              |    |   |  |  |  |  |  |                                                                                         |  |  |  |  |  |  |  |                                                    |  |  |  |  |  |  |  |
| <b>Total (95% CI)</b>                                                                                                                                                                                                                                                                                                                                                                                                                                                                                                                                                                                                                                                                                                                                                                                                                                                                                                                                                                                                                                                                                                                                                                                                                                                                                                                                                                           | <b>2480</b> | <b>2418</b> | <b>100.0%</b> |       |        | <b>1.92 [1.50, 2.47]</b>         |                                  |                   |     |  |     |  |        |                                  |                                  |        |       |        |       |                        |   |    |   |    |       |                    |  |                        |   |    |   |    |      |                    |  |                    |   |     |   |     |       |                   |  |                       |            |            |               |  |  |                          |  |              |    |   |  |  |  |  |  |                                                                                         |  |  |  |  |  |  |  |                                                    |  |  |  |  |  |  |  |
| Total events                                                                                                                                                                                                                                                                                                                                                                                                                                                                                                                                                                                                                                                                                                                                                                                                                                                                                                                                                                                                                                                                                                                                                                                                                                                                                                                                                                                    | 183         | 135         |               |       |        |                                  |                                  |                   |     |  |     |  |        |                                  |                                  |        |       |        |       |                        |   |    |   |    |       |                    |  |                        |   |    |   |    |      |                    |  |                    |   |     |   |     |       |                   |  |                       |            |            |               |  |  |                          |  |              |    |   |  |  |  |  |  |                                                                                         |  |  |  |  |  |  |  |                                                    |  |  |  |  |  |  |  |
| Heterogeneity: $\tau^2 = 0.00$ ; $\chi^2 = 11.80$ , $df = 19$ ( $P = 0.89$ ); $I^2 = 0\%$                                                                                                                                                                                                                                                                                                                                                                                                                                                                                                                                                                                                                                                                                                                                                                                                                                                                                                                                                                                                                                                                                                                                                                                                                                                                                                       |             |             |               |       |        |                                  |                                  |                   |     |  |     |  |        |                                  |                                  |        |       |        |       |                        |   |    |   |    |       |                    |  |                        |   |    |   |    |      |                    |  |                    |   |     |   |     |       |                   |  |                       |            |            |               |  |  |                          |  |              |    |   |  |  |  |  |  |                                                                                         |  |  |  |  |  |  |  |                                                    |  |  |  |  |  |  |  |
| Test for overall effect: $Z = 5.12$ ( $P < 0.00001$ )                                                                                                                                                                                                                                                                                                                                                                                                                                                                                                                                                                                                                                                                                                                                                                                                                                                                                                                                                                                                                                                                                                                                                                                                                                                                                                                                           |             |             |               |       |        |                                  |                                  |                   |     |  |     |  |        |                                  |                                  |        |       |        |       |                        |   |    |   |    |       |                    |  |                        |   |    |   |    |      |                    |  |                    |   |     |   |     |       |                   |  |                       |            |            |               |  |  |                          |  |              |    |   |  |  |  |  |  |                                                                                         |  |  |  |  |  |  |  |                                                    |  |  |  |  |  |  |  |
| Test for subgroup differences: $\chi^2 = 0.05$ , $df = 1$ ( $P = 0.82$ ), $I^2 = 0\%$                                                                                                                                                                                                                                                                                                                                                                                                                                                                                                                                                                                                                                                                                                                                                                                                                                                                                                                                                                                                                                                                                                                                                                                                                                                                                                           |             |             |               |       |        |                                  |                                  |                   |     |  |     |  |        |                                  |                                  |        |       |        |       |                        |   |    |   |    |       |                    |  |                        |   |    |   |    |      |                    |  |                    |   |     |   |     |       |                   |  |                       |            |            |               |  |  |                          |  |              |    |   |  |  |  |  |  |                                                                                         |  |  |  |  |  |  |  |                                                    |  |  |  |  |  |  |  |
|                                                                                                                                                                                                                                                                                                                                                                                                                                                                                                                                                                                                                                                                                                                                                                                                                                                                                                                                                                                                                                                                                                                                                                                                                                                                                                                                                                                                 |             |             |               |       |        |                                  |                                  |                   |     |  |     |  |        |                                  |                                  |        |       |        |       |                        |   |    |   |    |       |                    |  |                        |   |    |   |    |      |                    |  |                    |   |     |   |     |       |                   |  |                       |            |            |               |  |  |                          |  |              |    |   |  |  |  |  |  |                                                                                         |  |  |  |  |  |  |  |                                                    |  |  |  |  |  |  |  |
| <table border="1"> <thead> <tr> <th rowspan="2">Study or Subgroup</th> <th colspan="2">LAA</th> <th colspan="2">PVI</th> <th rowspan="2">Weight</th> <th rowspan="2">Odds Ratio<br/>IV, Random, 95% CI</th> <th rowspan="2">Odds Ratio<br/>IV, Random, 95% CI</th> </tr> <tr> <th>Events</th> <th>Total</th> <th>Events</th> <th>Total</th> </tr> </thead> <tbody> <tr> <td>Gauzebroek et al, 2008</td> <td>8</td> <td>28</td> <td>2</td> <td>12</td> <td>34.9%</td> <td>2.00 [0.36, 11.23]</td> <td></td> </tr> <tr> <td>Srivastava et al, 2008</td> <td>1</td> <td>40</td> <td>0</td> <td>40</td> <td>9.9%</td> <td>3.08 [0.12, 77.80]</td> <td></td> </tr> <tr> <td>Stulak et al, 2014</td> <td>3</td> <td>110</td> <td>7</td> <td>269</td> <td>55.2%</td> <td>1.05 [0.27, 4.13]</td> <td></td> </tr> <tr> <td><b>Total (95% CI)</b></td> <td><b>178</b></td> <td><b>321</b></td> <td><b>100.0%</b></td> <td></td> <td></td> <td><b>1.46 [0.53, 4.05]</b></td> <td></td> </tr> <tr> <td>Total events</td> <td>12</td> <td>9</td> <td></td> <td></td> <td></td> <td></td> <td></td> </tr> <tr> <td colspan="8">Heterogeneity: <math>\tau^2 = 0.00</math>; <math>\chi^2 = 0.56</math>, <math>df = 2</math> (<math>P = 0.76</math>); <math>I^2 = 0\%</math></td> </tr> <tr> <td colspan="8">Test for overall effect: <math>Z = 0.73</math> (<math>P = 0.46</math>)</td> </tr> </tbody> </table> |             |             |               |       |        |                                  |                                  | Study or Subgroup | LAA |  | PVI |  | Weight | Odds Ratio<br>IV, Random, 95% CI | Odds Ratio<br>IV, Random, 95% CI | Events | Total | Events | Total | Gauzebroek et al, 2008 | 8 | 28 | 2 | 12 | 34.9% | 2.00 [0.36, 11.23] |  | Srivastava et al, 2008 | 1 | 40 | 0 | 40 | 9.9% | 3.08 [0.12, 77.80] |  | Stulak et al, 2014 | 3 | 110 | 7 | 269 | 55.2% | 1.05 [0.27, 4.13] |  | <b>Total (95% CI)</b> | <b>178</b> | <b>321</b> | <b>100.0%</b> |  |  | <b>1.46 [0.53, 4.05]</b> |  | Total events | 12 | 9 |  |  |  |  |  | Heterogeneity: $\tau^2 = 0.00$ ; $\chi^2 = 0.56$ , $df = 2$ ( $P = 0.76$ ); $I^2 = 0\%$ |  |  |  |  |  |  |  | Test for overall effect: $Z = 0.73$ ( $P = 0.46$ ) |  |  |  |  |  |  |  |
| Study or Subgroup                                                                                                                                                                                                                                                                                                                                                                                                                                                                                                                                                                                                                                                                                                                                                                                                                                                                                                                                                                                                                                                                                                                                                                                                                                                                                                                                                                               | LAA         |             | PVI           |       | Weight | Odds Ratio<br>IV, Random, 95% CI | Odds Ratio<br>IV, Random, 95% CI |                   |     |  |     |  |        |                                  |                                  |        |       |        |       |                        |   |    |   |    |       |                    |  |                        |   |    |   |    |      |                    |  |                    |   |     |   |     |       |                   |  |                       |            |            |               |  |  |                          |  |              |    |   |  |  |  |  |  |                                                                                         |  |  |  |  |  |  |  |                                                    |  |  |  |  |  |  |  |
|                                                                                                                                                                                                                                                                                                                                                                                                                                                                                                                                                                                                                                                                                                                                                                                                                                                                                                                                                                                                                                                                                                                                                                                                                                                                                                                                                                                                 | Events      | Total       | Events        | Total |        |                                  |                                  |                   |     |  |     |  |        |                                  |                                  |        |       |        |       |                        |   |    |   |    |       |                    |  |                        |   |    |   |    |      |                    |  |                    |   |     |   |     |       |                   |  |                       |            |            |               |  |  |                          |  |              |    |   |  |  |  |  |  |                                                                                         |  |  |  |  |  |  |  |                                                    |  |  |  |  |  |  |  |
| Gauzebroek et al, 2008                                                                                                                                                                                                                                                                                                                                                                                                                                                                                                                                                                                                                                                                                                                                                                                                                                                                                                                                                                                                                                                                                                                                                                                                                                                                                                                                                                          | 8           | 28          | 2             | 12    | 34.9%  | 2.00 [0.36, 11.23]               |                                  |                   |     |  |     |  |        |                                  |                                  |        |       |        |       |                        |   |    |   |    |       |                    |  |                        |   |    |   |    |      |                    |  |                    |   |     |   |     |       |                   |  |                       |            |            |               |  |  |                          |  |              |    |   |  |  |  |  |  |                                                                                         |  |  |  |  |  |  |  |                                                    |  |  |  |  |  |  |  |
| Srivastava et al, 2008                                                                                                                                                                                                                                                                                                                                                                                                                                                                                                                                                                                                                                                                                                                                                                                                                                                                                                                                                                                                                                                                                                                                                                                                                                                                                                                                                                          | 1           | 40          | 0             | 40    | 9.9%   | 3.08 [0.12, 77.80]               |                                  |                   |     |  |     |  |        |                                  |                                  |        |       |        |       |                        |   |    |   |    |       |                    |  |                        |   |    |   |    |      |                    |  |                    |   |     |   |     |       |                   |  |                       |            |            |               |  |  |                          |  |              |    |   |  |  |  |  |  |                                                                                         |  |  |  |  |  |  |  |                                                    |  |  |  |  |  |  |  |
| Stulak et al, 2014                                                                                                                                                                                                                                                                                                                                                                                                                                                                                                                                                                                                                                                                                                                                                                                                                                                                                                                                                                                                                                                                                                                                                                                                                                                                                                                                                                              | 3           | 110         | 7             | 269   | 55.2%  | 1.05 [0.27, 4.13]                |                                  |                   |     |  |     |  |        |                                  |                                  |        |       |        |       |                        |   |    |   |    |       |                    |  |                        |   |    |   |    |      |                    |  |                    |   |     |   |     |       |                   |  |                       |            |            |               |  |  |                          |  |              |    |   |  |  |  |  |  |                                                                                         |  |  |  |  |  |  |  |                                                    |  |  |  |  |  |  |  |
| <b>Total (95% CI)</b>                                                                                                                                                                                                                                                                                                                                                                                                                                                                                                                                                                                                                                                                                                                                                                                                                                                                                                                                                                                                                                                                                                                                                                                                                                                                                                                                                                           | <b>178</b>  | <b>321</b>  | <b>100.0%</b> |       |        | <b>1.46 [0.53, 4.05]</b>         |                                  |                   |     |  |     |  |        |                                  |                                  |        |       |        |       |                        |   |    |   |    |       |                    |  |                        |   |    |   |    |      |                    |  |                    |   |     |   |     |       |                   |  |                       |            |            |               |  |  |                          |  |              |    |   |  |  |  |  |  |                                                                                         |  |  |  |  |  |  |  |                                                    |  |  |  |  |  |  |  |
| Total events                                                                                                                                                                                                                                                                                                                                                                                                                                                                                                                                                                                                                                                                                                                                                                                                                                                                                                                                                                                                                                                                                                                                                                                                                                                                                                                                                                                    | 12          | 9           |               |       |        |                                  |                                  |                   |     |  |     |  |        |                                  |                                  |        |       |        |       |                        |   |    |   |    |       |                    |  |                        |   |    |   |    |      |                    |  |                    |   |     |   |     |       |                   |  |                       |            |            |               |  |  |                          |  |              |    |   |  |  |  |  |  |                                                                                         |  |  |  |  |  |  |  |                                                    |  |  |  |  |  |  |  |
| Heterogeneity: $\tau^2 = 0.00$ ; $\chi^2 = 0.56$ , $df = 2$ ( $P = 0.76$ ); $I^2 = 0\%$                                                                                                                                                                                                                                                                                                                                                                                                                                                                                                                                                                                                                                                                                                                                                                                                                                                                                                                                                                                                                                                                                                                                                                                                                                                                                                         |             |             |               |       |        |                                  |                                  |                   |     |  |     |  |        |                                  |                                  |        |       |        |       |                        |   |    |   |    |       |                    |  |                        |   |    |   |    |      |                    |  |                    |   |     |   |     |       |                   |  |                       |            |            |               |  |  |                          |  |              |    |   |  |  |  |  |  |                                                                                         |  |  |  |  |  |  |  |                                                    |  |  |  |  |  |  |  |
| Test for overall effect: $Z = 0.73$ ( $P = 0.46$ )                                                                                                                                                                                                                                                                                                                                                                                                                                                                                                                                                                                                                                                                                                                                                                                                                                                                                                                                                                                                                                                                                                                                                                                                                                                                                                                                              |             |             |               |       |        |                                  |                                  |                   |     |  |     |  |        |                                  |                                  |        |       |        |       |                        |   |    |   |    |       |                    |  |                        |   |    |   |    |      |                    |  |                    |   |     |   |     |       |                   |  |                       |            |            |               |  |  |                          |  |              |    |   |  |  |  |  |  |                                                                                         |  |  |  |  |  |  |  |                                                    |  |  |  |  |  |  |  |

C

## Reoperation

### Forest Plot of Reoperation(Conventional Pairwise Meta-Analysis)

| Study or Subgroup                                                                                          | BAA    |             | Control |             | Weight        | Odds Ratio<br>IV, Random, 95% CI | Odds Ratio<br>IV, Random, 95% CI |
|------------------------------------------------------------------------------------------------------------|--------|-------------|---------|-------------|---------------|----------------------------------|----------------------------------|
|                                                                                                            | Events | Total       | Events  | Total       |               |                                  |                                  |
| <b>9.1.1 BAA vs LAA</b>                                                                                    |        |             |         |             |               |                                  |                                  |
| Guden et al, 2003                                                                                          | 3      | 48          | 1       | 57          | 3.2%          | 3.73 [0.38, 37.12]               |                                  |
| Kim et al, 2011                                                                                            | 2      | 199         | 1       | 85          | 2.9%          | 0.85 [0.08, 9.53]                |                                  |
| McCarthy et al, 2010                                                                                       | 29     | 91          | 47      | 175         | 22.1%         | 1.27 [0.73, 2.22]                |                                  |
| Srivastava et al, 2008                                                                                     | 1      | 40          | 2       | 40          | 2.8%          | 0.49 [0.04, 5.60]                |                                  |
| Stulak et al, 2014                                                                                         | 33     | 514         | 1       | 110         | 4.1%          | 7.48 [1.01, 55.27]               |                                  |
| Takai et al, 2017                                                                                          | 27     | 1339        | 7       | 266         | 14.9%         | 0.76 [0.33, 1.77]                |                                  |
| <b>Subtotal (95% CI)</b>                                                                                   |        | <b>2231</b> |         | <b>733</b>  | <b>49.9%</b>  | <b>1.23 [0.71, 2.11]</b>         |                                  |
| Total events                                                                                               | 95     |             | 59      |             |               |                                  |                                  |
| Heterogeneity: Tau <sup>2</sup> = 0.08; Chi <sup>2</sup> = 5.92, df = 5 (P = 0.31); I <sup>2</sup> = 16%   |        |             |         |             |               |                                  |                                  |
| Test for overall effect: Z = 0.74 (P = 0.46)                                                               |        |             |         |             |               |                                  |                                  |
| <b>9.1.2 BAA vs PVI</b>                                                                                    |        |             |         |             |               |                                  |                                  |
| Albrecht et al, 2009                                                                                       | 2      | 20          | 0       | 20          | 1.8%          | 5.54 [0.25, 123.08]              |                                  |
| McCarthy et al, 2010                                                                                       | 29     | 91          | 4       | 50          | 10.4%         | 5.38 [1.77, 16.37]               |                                  |
| Srivastava et al, 2008                                                                                     | 1      | 40          | 0       | 40          | 1.7%          | 3.08 [0.12, 77.80]               |                                  |
| Stulak et al, 2014                                                                                         | 33     | 514         | 8       | 269         | 16.0%         | 2.24 [1.02, 4.92]                |                                  |
| Takai et al, 2017                                                                                          | 27     | 1339        | 16      | 1797        | 20.1%         | 2.29 [1.23, 4.27]                |                                  |
| <b>Subtotal (95% CI)</b>                                                                                   |        | <b>2004</b> |         | <b>2176</b> | <b>50.1%</b>  | <b>2.66 [1.71, 4.12]</b>         |                                  |
| Total events                                                                                               | 92     |             | 28      |             |               |                                  |                                  |
| Heterogeneity: Tau <sup>2</sup> = 0.00; Chi <sup>2</sup> = 2.17, df = 4 (P = 0.70); I <sup>2</sup> = 0%    |        |             |         |             |               |                                  |                                  |
| Test for overall effect: Z = 4.37 (P < 0.0001)                                                             |        |             |         |             |               |                                  |                                  |
| <b>Total (95% CI)</b>                                                                                      |        | <b>4235</b> |         | <b>2909</b> | <b>100.0%</b> | <b>1.88 [1.23, 2.89]</b>         |                                  |
| Total events                                                                                               | 187    |             | 87      |             |               |                                  |                                  |
| Heterogeneity: Tau <sup>2</sup> = 0.14; Chi <sup>2</sup> = 14.50, df = 10 (P = 0.15); I <sup>2</sup> = 31% |        |             |         |             |               |                                  |                                  |
| Test for overall effect: Z = 2.89 (P = 0.004)                                                              |        |             |         |             |               |                                  |                                  |
| Test for subgroup differences: Chi <sup>2</sup> = 4.71, df = 1 (P = 0.03), I <sup>2</sup> = 78.8%          |        |             |         |             |               |                                  |                                  |
| Study or Subgroup                                                                                          | LAA    |             | PVI     |             | Weight        | Odds Ratio<br>IV, Random, 95% CI | Odds Ratio<br>IV, Random, 95% CI |
|                                                                                                            | Events | Total       | Events  | Total       |               |                                  |                                  |
| McCarthy et al, 2010                                                                                       | 47     | 175         | 4       | 50          | 35.2%         | 4.22 [1.44, 12.37]               |                                  |
| Srivastava et al, 2008                                                                                     | 2      | 40          | 0       | 40          | 8.4%          | 5.26 [0.24, 113.11]              |                                  |
| Stulak et al, 2014                                                                                         | 1      | 110         | 8       | 269         | 15.7%         | 0.30 [0.04, 2.42]                |                                  |
| Takai et al, 2017                                                                                          | 7      | 266         | 16      | 1797        | 40.6%         | 3.01 [1.23, 7.38]                |                                  |
| <b>Total (95% CI)</b>                                                                                      |        | <b>591</b>  |         | <b>2156</b> | <b>100.0%</b> | <b>2.47 [0.95, 6.44]</b>         |                                  |
| Total events                                                                                               | 57     |             | 28      |             |               |                                  |                                  |
| Heterogeneity: Tau <sup>2</sup> = 0.38; Chi <sup>2</sup> = 5.14, df = 3 (P = 0.16); I <sup>2</sup> = 42%   |        |             |         |             |               |                                  |                                  |
| Test for overall effect: Z = 1.85 (P = 0.06)                                                               |        |             |         |             |               |                                  |                                  |

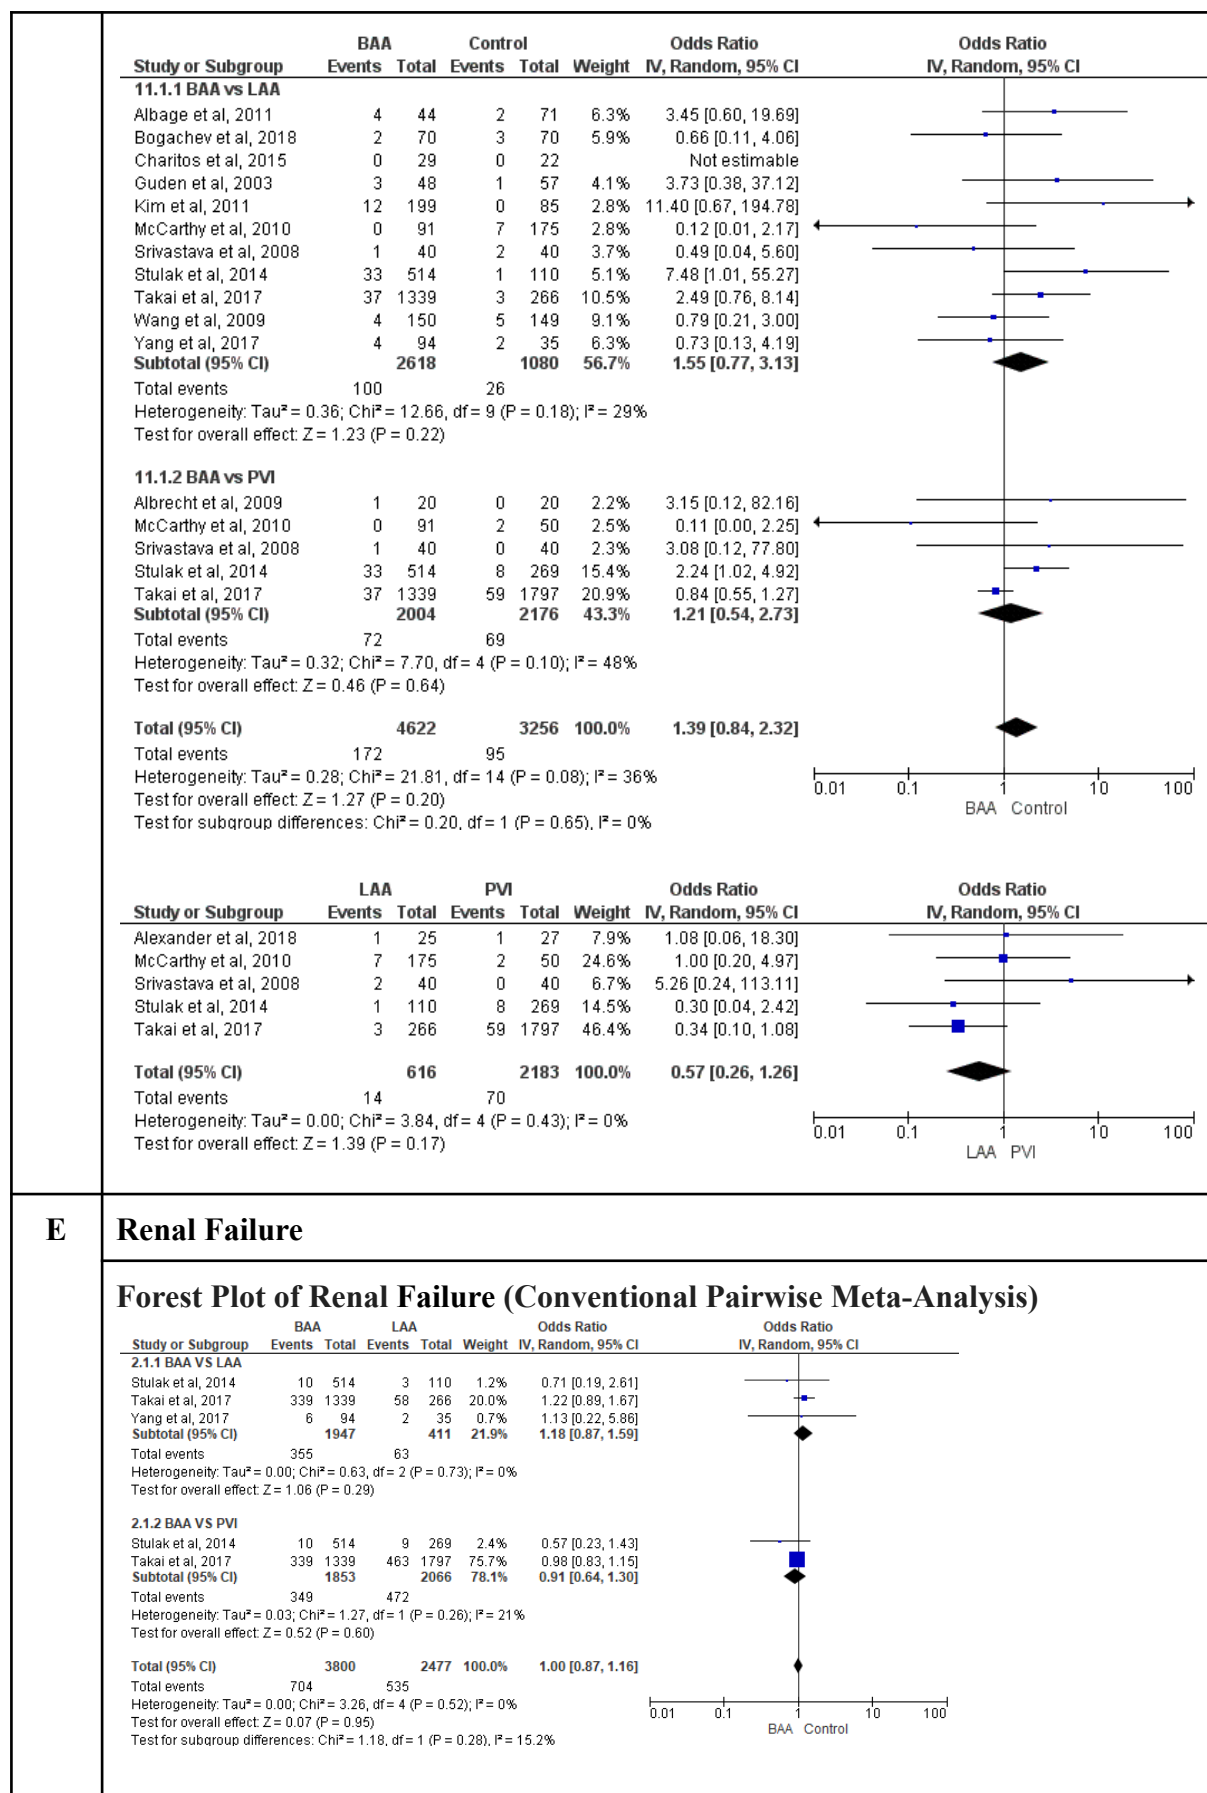

|                                                                                                            | <table><tr><th></th><th colspan="2">PVI</th><th colspan="2">LAA</th><th></th><th>Odds Ratio</th><th></th></tr><tr><th>Study or Subgroup</th><th>Events</th><th>Total</th><th>Events</th><th>Total</th><th>Weight</th><th>IV, Random, 95% CI</th><th>Odds Ratio<br/>IV, Random, 95% CI</th></tr><tr><td>Stulak et al, 2014</td><td>9</td><td>269</td><td>3</td><td>110</td><td>5.2%</td><td>1.23 [0.33, 4.65]</td><td></td></tr><tr><td>Takai et al, 2017</td><td>463</td><td>1797</td><td>58</td><td>266</td><td>94.8%</td><td>1.24 [0.91, 1.70]</td><td></td></tr><tr><td><b>Total (95% CI)</b></td><td></td><td><b>2066</b></td><td></td><td><b>376</b></td><td><b>100.0%</b></td><td><b>1.24 [0.92, 1.68]</b></td><td></td></tr><tr><td>Total events</td><td>472</td><td></td><td>61</td><td></td><td></td><td></td><td></td></tr><tr><td colspan="7">Heterogeneity: Tau<sup>2</sup> = 0.00; Chi<sup>2</sup> = 0.00, df = 1 (P = 0.99); I<sup>2</sup> = 0%</td><td></td></tr><tr><td colspan="7">Test for overall effect: Z = 1.42 (P = 0.16)</td><td></td></tr></table>                                                                                                                                                                                                                                                                                                                                                                                                                                                                                                                                                                                                                                                                                                                                                                                                                                                                                                                                                                                                                                                                                                                                                                                                                                                                                                                                                                                                                                                                                                                                                                                                                                                                                                                                                                                                                                                                                                                                                                                                                                                                                                                                                                                                                                                                                                                                                                                                                                                                                                                                                                                                                                                                                                                                                                                                                                                                                                                                                                                                                                                                                                                                                                                                                                                                                                                                                                                                                                                                                                                                                                                                                                                                                                                                                                                                                                                                                                                                                                                                                                                                                    |             | PVI     |             | LAA           |                          |                                  | Odds Ratio |  | Study or Subgroup | Events | Total | Events | Total | Weight | IV, Random, 95% CI | Odds Ratio<br>IV, Random, 95% CI | Stulak et al, 2014      | 9 | 269 | 3 | 110 | 5.2% | 1.23 [0.33, 4.65] |  | Takai et al, 2017  | 463 | 1797 | 58 | 266 | 94.8% | 1.24 [0.91, 1.70] |  | <b>Total (95% CI)</b> |   | <b>2066</b> |   | <b>376</b> | <b>100.0%</b> | <b>1.24 [0.92, 1.68]</b> |  | Total events         | 472 |    | 61 |    |      |                    |  | Heterogeneity: Tau <sup>2</sup> = 0.00; Chi <sup>2</sup> = 0.00, df = 1 (P = 0.99); I <sup>2</sup> = 0% |   |     |    |    |       |                   |  | Test for overall effect: Z = 1.42 (P = 0.16) |   |    |   |     |      |                    |  |                    |   |    |   |    |       |                   |  |                    |   |     |   |     |      |                    |  |                   |    |      |    |     |       |                   |  |                  |   |    |   |    |      |                    |  |                          |  |             |  |            |              |                          |  |              |    |  |    |  |  |  |  |                                                                                                           |  |  |  |  |  |  |  |                                              |  |  |  |  |  |  |  |                         |  |  |  |  |  |  |  |                      |   |    |   |    |      |                   |  |                      |   |    |   |    |      |                    |  |                    |   |     |   |     |      |                    |  |                   |    |      |     |      |       |                   |  |                          |  |             |  |             |              |                          |  |              |    |  |     |  |  |  |  |                                                                                                         |  |  |  |  |  |  |  |                                              |  |  |  |  |  |  |  |                       |  |             |  |             |               |                          |  |              |     |  |     |  |  |  |  |                                                                                                            |  |  |  |  |  |  |  |                                              |  |  |  |  |  |  |  |                                                                                                |  |  |  |  |  |  |  |  |     |  |     |  |  |            |  |                   |        |       |        |       |        |                    |                                  |                      |   |    |   |     |      |                    |  |                    |   |     |   |     |      |                    |  |                   |     |      |    |     |       |                   |  |                       |  |             |  |            |               |                          |  |              |     |  |    |  |  |  |  |                                                                                                         |  |  |  |  |  |  |  |                                              |  |  |  |  |  |  |  |
|------------------------------------------------------------------------------------------------------------|----------------------------------------------------------------------------------------------------------------------------------------------------------------------------------------------------------------------------------------------------------------------------------------------------------------------------------------------------------------------------------------------------------------------------------------------------------------------------------------------------------------------------------------------------------------------------------------------------------------------------------------------------------------------------------------------------------------------------------------------------------------------------------------------------------------------------------------------------------------------------------------------------------------------------------------------------------------------------------------------------------------------------------------------------------------------------------------------------------------------------------------------------------------------------------------------------------------------------------------------------------------------------------------------------------------------------------------------------------------------------------------------------------------------------------------------------------------------------------------------------------------------------------------------------------------------------------------------------------------------------------------------------------------------------------------------------------------------------------------------------------------------------------------------------------------------------------------------------------------------------------------------------------------------------------------------------------------------------------------------------------------------------------------------------------------------------------------------------------------------------------------------------------------------------------------------------------------------------------------------------------------------------------------------------------------------------------------------------------------------------------------------------------------------------------------------------------------------------------------------------------------------------------------------------------------------------------------------------------------------------------------------------------------------------------------------------------------------------------------------------------------------------------------------------------------------------------------------------------------------------------------------------------------------------------------------------------------------------------------------------------------------------------------------------------------------------------------------------------------------------------------------------------------------------------------------------------------------------------------------------------------------------------------------------------------------------------------------------------------------------------------------------------------------------------------------------------------------------------------------------------------------------------------------------------------------------------------------------------------------------------------------------------------------------------------------------------------------------------------------------------------------------------------------------------------------------------------------------------------------------------------------------------------------------------------------------------------------------------------------------------------------------------------------------------------------------------------------------------------------------------------------------------------------------------------------------------------------------------------------------------------------------------------------------------------------------------------------------------------------------------------------------------------------------------------------------------------------------------------------------------------------------------------------------------------------------------------------------------------------------------------------------------------------------------------------------------------------------------------------------------------------------------------------------------------------------------------------------------------------------------------------------------------------------------------------------------------------------------------------------------------------------------------------------------------------------------------------------------------------------------------------------------------|-------------|---------|-------------|---------------|--------------------------|----------------------------------|------------|--|-------------------|--------|-------|--------|-------|--------|--------------------|----------------------------------|-------------------------|---|-----|---|-----|------|-------------------|--|--------------------|-----|------|----|-----|-------|-------------------|--|-----------------------|---|-------------|---|------------|---------------|--------------------------|--|----------------------|-----|----|----|----|------|--------------------|--|---------------------------------------------------------------------------------------------------------|---|-----|----|----|-------|-------------------|--|----------------------------------------------|---|----|---|-----|------|--------------------|--|--------------------|---|----|---|----|-------|-------------------|--|--------------------|---|-----|---|-----|------|--------------------|--|-------------------|----|------|----|-----|-------|-------------------|--|------------------|---|----|---|----|------|--------------------|--|--------------------------|--|-------------|--|------------|--------------|--------------------------|--|--------------|----|--|----|--|--|--|--|-----------------------------------------------------------------------------------------------------------|--|--|--|--|--|--|--|----------------------------------------------|--|--|--|--|--|--|--|-------------------------|--|--|--|--|--|--|--|----------------------|---|----|---|----|------|-------------------|--|----------------------|---|----|---|----|------|--------------------|--|--------------------|---|-----|---|-----|------|--------------------|--|-------------------|----|------|-----|------|-------|-------------------|--|--------------------------|--|-------------|--|-------------|--------------|--------------------------|--|--------------|----|--|-----|--|--|--|--|---------------------------------------------------------------------------------------------------------|--|--|--|--|--|--|--|----------------------------------------------|--|--|--|--|--|--|--|-----------------------|--|-------------|--|-------------|---------------|--------------------------|--|--------------|-----|--|-----|--|--|--|--|------------------------------------------------------------------------------------------------------------|--|--|--|--|--|--|--|----------------------------------------------|--|--|--|--|--|--|--|------------------------------------------------------------------------------------------------|--|--|--|--|--|--|--|--|-----|--|-----|--|--|------------|--|-------------------|--------|-------|--------|-------|--------|--------------------|----------------------------------|----------------------|---|----|---|-----|------|--------------------|--|--------------------|---|-----|---|-----|------|--------------------|--|-------------------|-----|------|----|-----|-------|-------------------|--|-----------------------|--|-------------|--|------------|---------------|--------------------------|--|--------------|-----|--|----|--|--|--|--|---------------------------------------------------------------------------------------------------------|--|--|--|--|--|--|--|----------------------------------------------|--|--|--|--|--|--|--|
|                                                                                                            | PVI                                                                                                                                                                                                                                                                                                                                                                                                                                                                                                                                                                                                                                                                                                                                                                                                                                                                                                                                                                                                                                                                                                                                                                                                                                                                                                                                                                                                                                                                                                                                                                                                                                                                                                                                                                                                                                                                                                                                                                                                                                                                                                                                                                                                                                                                                                                                                                                                                                                                                                                                                                                                                                                                                                                                                                                                                                                                                                                                                                                                                                                                                                                                                                                                                                                                                                                                                                                                                                                                                                                                                                                                                                                                                                                                                                                                                                                                                                                                                                                                                                                                                                                                                                                                                                                                                                                                                                                                                                                                                                                                                                                                                                                                                                                                                                                                                                                                                                                                                                                                                                                                                                                                                            |             | LAA     |             |               | Odds Ratio               |                                  |            |  |                   |        |       |        |       |        |                    |                                  |                         |   |     |   |     |      |                   |  |                    |     |      |    |     |       |                   |  |                       |   |             |   |            |               |                          |  |                      |     |    |    |    |      |                    |  |                                                                                                         |   |     |    |    |       |                   |  |                                              |   |    |   |     |      |                    |  |                    |   |    |   |    |       |                   |  |                    |   |     |   |     |      |                    |  |                   |    |      |    |     |       |                   |  |                  |   |    |   |    |      |                    |  |                          |  |             |  |            |              |                          |  |              |    |  |    |  |  |  |  |                                                                                                           |  |  |  |  |  |  |  |                                              |  |  |  |  |  |  |  |                         |  |  |  |  |  |  |  |                      |   |    |   |    |      |                   |  |                      |   |    |   |    |      |                    |  |                    |   |     |   |     |      |                    |  |                   |    |      |     |      |       |                   |  |                          |  |             |  |             |              |                          |  |              |    |  |     |  |  |  |  |                                                                                                         |  |  |  |  |  |  |  |                                              |  |  |  |  |  |  |  |                       |  |             |  |             |               |                          |  |              |     |  |     |  |  |  |  |                                                                                                            |  |  |  |  |  |  |  |                                              |  |  |  |  |  |  |  |                                                                                                |  |  |  |  |  |  |  |  |     |  |     |  |  |            |  |                   |        |       |        |       |        |                    |                                  |                      |   |    |   |     |      |                    |  |                    |   |     |   |     |      |                    |  |                   |     |      |    |     |       |                   |  |                       |  |             |  |            |               |                          |  |              |     |  |    |  |  |  |  |                                                                                                         |  |  |  |  |  |  |  |                                              |  |  |  |  |  |  |  |
| Study or Subgroup                                                                                          | Events                                                                                                                                                                                                                                                                                                                                                                                                                                                                                                                                                                                                                                                                                                                                                                                                                                                                                                                                                                                                                                                                                                                                                                                                                                                                                                                                                                                                                                                                                                                                                                                                                                                                                                                                                                                                                                                                                                                                                                                                                                                                                                                                                                                                                                                                                                                                                                                                                                                                                                                                                                                                                                                                                                                                                                                                                                                                                                                                                                                                                                                                                                                                                                                                                                                                                                                                                                                                                                                                                                                                                                                                                                                                                                                                                                                                                                                                                                                                                                                                                                                                                                                                                                                                                                                                                                                                                                                                                                                                                                                                                                                                                                                                                                                                                                                                                                                                                                                                                                                                                                                                                                                                                         | Total       | Events  | Total       | Weight        | IV, Random, 95% CI       | Odds Ratio<br>IV, Random, 95% CI |            |  |                   |        |       |        |       |        |                    |                                  |                         |   |     |   |     |      |                   |  |                    |     |      |    |     |       |                   |  |                       |   |             |   |            |               |                          |  |                      |     |    |    |    |      |                    |  |                                                                                                         |   |     |    |    |       |                   |  |                                              |   |    |   |     |      |                    |  |                    |   |    |   |    |       |                   |  |                    |   |     |   |     |      |                    |  |                   |    |      |    |     |       |                   |  |                  |   |    |   |    |      |                    |  |                          |  |             |  |            |              |                          |  |              |    |  |    |  |  |  |  |                                                                                                           |  |  |  |  |  |  |  |                                              |  |  |  |  |  |  |  |                         |  |  |  |  |  |  |  |                      |   |    |   |    |      |                   |  |                      |   |    |   |    |      |                    |  |                    |   |     |   |     |      |                    |  |                   |    |      |     |      |       |                   |  |                          |  |             |  |             |              |                          |  |              |    |  |     |  |  |  |  |                                                                                                         |  |  |  |  |  |  |  |                                              |  |  |  |  |  |  |  |                       |  |             |  |             |               |                          |  |              |     |  |     |  |  |  |  |                                                                                                            |  |  |  |  |  |  |  |                                              |  |  |  |  |  |  |  |                                                                                                |  |  |  |  |  |  |  |  |     |  |     |  |  |            |  |                   |        |       |        |       |        |                    |                                  |                      |   |    |   |     |      |                    |  |                    |   |     |   |     |      |                    |  |                   |     |      |    |     |       |                   |  |                       |  |             |  |            |               |                          |  |              |     |  |    |  |  |  |  |                                                                                                         |  |  |  |  |  |  |  |                                              |  |  |  |  |  |  |  |
| Stulak et al, 2014                                                                                         | 9                                                                                                                                                                                                                                                                                                                                                                                                                                                                                                                                                                                                                                                                                                                                                                                                                                                                                                                                                                                                                                                                                                                                                                                                                                                                                                                                                                                                                                                                                                                                                                                                                                                                                                                                                                                                                                                                                                                                                                                                                                                                                                                                                                                                                                                                                                                                                                                                                                                                                                                                                                                                                                                                                                                                                                                                                                                                                                                                                                                                                                                                                                                                                                                                                                                                                                                                                                                                                                                                                                                                                                                                                                                                                                                                                                                                                                                                                                                                                                                                                                                                                                                                                                                                                                                                                                                                                                                                                                                                                                                                                                                                                                                                                                                                                                                                                                                                                                                                                                                                                                                                                                                                                              | 269         | 3       | 110         | 5.2%          | 1.23 [0.33, 4.65]        |                                  |            |  |                   |        |       |        |       |        |                    |                                  |                         |   |     |   |     |      |                   |  |                    |     |      |    |     |       |                   |  |                       |   |             |   |            |               |                          |  |                      |     |    |    |    |      |                    |  |                                                                                                         |   |     |    |    |       |                   |  |                                              |   |    |   |     |      |                    |  |                    |   |    |   |    |       |                   |  |                    |   |     |   |     |      |                    |  |                   |    |      |    |     |       |                   |  |                  |   |    |   |    |      |                    |  |                          |  |             |  |            |              |                          |  |              |    |  |    |  |  |  |  |                                                                                                           |  |  |  |  |  |  |  |                                              |  |  |  |  |  |  |  |                         |  |  |  |  |  |  |  |                      |   |    |   |    |      |                   |  |                      |   |    |   |    |      |                    |  |                    |   |     |   |     |      |                    |  |                   |    |      |     |      |       |                   |  |                          |  |             |  |             |              |                          |  |              |    |  |     |  |  |  |  |                                                                                                         |  |  |  |  |  |  |  |                                              |  |  |  |  |  |  |  |                       |  |             |  |             |               |                          |  |              |     |  |     |  |  |  |  |                                                                                                            |  |  |  |  |  |  |  |                                              |  |  |  |  |  |  |  |                                                                                                |  |  |  |  |  |  |  |  |     |  |     |  |  |            |  |                   |        |       |        |       |        |                    |                                  |                      |   |    |   |     |      |                    |  |                    |   |     |   |     |      |                    |  |                   |     |      |    |     |       |                   |  |                       |  |             |  |            |               |                          |  |              |     |  |    |  |  |  |  |                                                                                                         |  |  |  |  |  |  |  |                                              |  |  |  |  |  |  |  |
| Takai et al, 2017                                                                                          | 463                                                                                                                                                                                                                                                                                                                                                                                                                                                                                                                                                                                                                                                                                                                                                                                                                                                                                                                                                                                                                                                                                                                                                                                                                                                                                                                                                                                                                                                                                                                                                                                                                                                                                                                                                                                                                                                                                                                                                                                                                                                                                                                                                                                                                                                                                                                                                                                                                                                                                                                                                                                                                                                                                                                                                                                                                                                                                                                                                                                                                                                                                                                                                                                                                                                                                                                                                                                                                                                                                                                                                                                                                                                                                                                                                                                                                                                                                                                                                                                                                                                                                                                                                                                                                                                                                                                                                                                                                                                                                                                                                                                                                                                                                                                                                                                                                                                                                                                                                                                                                                                                                                                                                            | 1797        | 58      | 266         | 94.8%         | 1.24 [0.91, 1.70]        |                                  |            |  |                   |        |       |        |       |        |                    |                                  |                         |   |     |   |     |      |                   |  |                    |     |      |    |     |       |                   |  |                       |   |             |   |            |               |                          |  |                      |     |    |    |    |      |                    |  |                                                                                                         |   |     |    |    |       |                   |  |                                              |   |    |   |     |      |                    |  |                    |   |    |   |    |       |                   |  |                    |   |     |   |     |      |                    |  |                   |    |      |    |     |       |                   |  |                  |   |    |   |    |      |                    |  |                          |  |             |  |            |              |                          |  |              |    |  |    |  |  |  |  |                                                                                                           |  |  |  |  |  |  |  |                                              |  |  |  |  |  |  |  |                         |  |  |  |  |  |  |  |                      |   |    |   |    |      |                   |  |                      |   |    |   |    |      |                    |  |                    |   |     |   |     |      |                    |  |                   |    |      |     |      |       |                   |  |                          |  |             |  |             |              |                          |  |              |    |  |     |  |  |  |  |                                                                                                         |  |  |  |  |  |  |  |                                              |  |  |  |  |  |  |  |                       |  |             |  |             |               |                          |  |              |     |  |     |  |  |  |  |                                                                                                            |  |  |  |  |  |  |  |                                              |  |  |  |  |  |  |  |                                                                                                |  |  |  |  |  |  |  |  |     |  |     |  |  |            |  |                   |        |       |        |       |        |                    |                                  |                      |   |    |   |     |      |                    |  |                    |   |     |   |     |      |                    |  |                   |     |      |    |     |       |                   |  |                       |  |             |  |            |               |                          |  |              |     |  |    |  |  |  |  |                                                                                                         |  |  |  |  |  |  |  |                                              |  |  |  |  |  |  |  |
| <b>Total (95% CI)</b>                                                                                      |                                                                                                                                                                                                                                                                                                                                                                                                                                                                                                                                                                                                                                                                                                                                                                                                                                                                                                                                                                                                                                                                                                                                                                                                                                                                                                                                                                                                                                                                                                                                                                                                                                                                                                                                                                                                                                                                                                                                                                                                                                                                                                                                                                                                                                                                                                                                                                                                                                                                                                                                                                                                                                                                                                                                                                                                                                                                                                                                                                                                                                                                                                                                                                                                                                                                                                                                                                                                                                                                                                                                                                                                                                                                                                                                                                                                                                                                                                                                                                                                                                                                                                                                                                                                                                                                                                                                                                                                                                                                                                                                                                                                                                                                                                                                                                                                                                                                                                                                                                                                                                                                                                                                                                | <b>2066</b> |         | <b>376</b>  | <b>100.0%</b> | <b>1.24 [0.92, 1.68]</b> |                                  |            |  |                   |        |       |        |       |        |                    |                                  |                         |   |     |   |     |      |                   |  |                    |     |      |    |     |       |                   |  |                       |   |             |   |            |               |                          |  |                      |     |    |    |    |      |                    |  |                                                                                                         |   |     |    |    |       |                   |  |                                              |   |    |   |     |      |                    |  |                    |   |    |   |    |       |                   |  |                    |   |     |   |     |      |                    |  |                   |    |      |    |     |       |                   |  |                  |   |    |   |    |      |                    |  |                          |  |             |  |            |              |                          |  |              |    |  |    |  |  |  |  |                                                                                                           |  |  |  |  |  |  |  |                                              |  |  |  |  |  |  |  |                         |  |  |  |  |  |  |  |                      |   |    |   |    |      |                   |  |                      |   |    |   |    |      |                    |  |                    |   |     |   |     |      |                    |  |                   |    |      |     |      |       |                   |  |                          |  |             |  |             |              |                          |  |              |    |  |     |  |  |  |  |                                                                                                         |  |  |  |  |  |  |  |                                              |  |  |  |  |  |  |  |                       |  |             |  |             |               |                          |  |              |     |  |     |  |  |  |  |                                                                                                            |  |  |  |  |  |  |  |                                              |  |  |  |  |  |  |  |                                                                                                |  |  |  |  |  |  |  |  |     |  |     |  |  |            |  |                   |        |       |        |       |        |                    |                                  |                      |   |    |   |     |      |                    |  |                    |   |     |   |     |      |                    |  |                   |     |      |    |     |       |                   |  |                       |  |             |  |            |               |                          |  |              |     |  |    |  |  |  |  |                                                                                                         |  |  |  |  |  |  |  |                                              |  |  |  |  |  |  |  |
| Total events                                                                                               | 472                                                                                                                                                                                                                                                                                                                                                                                                                                                                                                                                                                                                                                                                                                                                                                                                                                                                                                                                                                                                                                                                                                                                                                                                                                                                                                                                                                                                                                                                                                                                                                                                                                                                                                                                                                                                                                                                                                                                                                                                                                                                                                                                                                                                                                                                                                                                                                                                                                                                                                                                                                                                                                                                                                                                                                                                                                                                                                                                                                                                                                                                                                                                                                                                                                                                                                                                                                                                                                                                                                                                                                                                                                                                                                                                                                                                                                                                                                                                                                                                                                                                                                                                                                                                                                                                                                                                                                                                                                                                                                                                                                                                                                                                                                                                                                                                                                                                                                                                                                                                                                                                                                                                                            |             | 61      |             |               |                          |                                  |            |  |                   |        |       |        |       |        |                    |                                  |                         |   |     |   |     |      |                   |  |                    |     |      |    |     |       |                   |  |                       |   |             |   |            |               |                          |  |                      |     |    |    |    |      |                    |  |                                                                                                         |   |     |    |    |       |                   |  |                                              |   |    |   |     |      |                    |  |                    |   |    |   |    |       |                   |  |                    |   |     |   |     |      |                    |  |                   |    |      |    |     |       |                   |  |                  |   |    |   |    |      |                    |  |                          |  |             |  |            |              |                          |  |              |    |  |    |  |  |  |  |                                                                                                           |  |  |  |  |  |  |  |                                              |  |  |  |  |  |  |  |                         |  |  |  |  |  |  |  |                      |   |    |   |    |      |                   |  |                      |   |    |   |    |      |                    |  |                    |   |     |   |     |      |                    |  |                   |    |      |     |      |       |                   |  |                          |  |             |  |             |              |                          |  |              |    |  |     |  |  |  |  |                                                                                                         |  |  |  |  |  |  |  |                                              |  |  |  |  |  |  |  |                       |  |             |  |             |               |                          |  |              |     |  |     |  |  |  |  |                                                                                                            |  |  |  |  |  |  |  |                                              |  |  |  |  |  |  |  |                                                                                                |  |  |  |  |  |  |  |  |     |  |     |  |  |            |  |                   |        |       |        |       |        |                    |                                  |                      |   |    |   |     |      |                    |  |                    |   |     |   |     |      |                    |  |                   |     |      |    |     |       |                   |  |                       |  |             |  |            |               |                          |  |              |     |  |    |  |  |  |  |                                                                                                         |  |  |  |  |  |  |  |                                              |  |  |  |  |  |  |  |
| Heterogeneity: Tau <sup>2</sup> = 0.00; Chi <sup>2</sup> = 0.00, df = 1 (P = 0.99); I <sup>2</sup> = 0%    |                                                                                                                                                                                                                                                                                                                                                                                                                                                                                                                                                                                                                                                                                                                                                                                                                                                                                                                                                                                                                                                                                                                                                                                                                                                                                                                                                                                                                                                                                                                                                                                                                                                                                                                                                                                                                                                                                                                                                                                                                                                                                                                                                                                                                                                                                                                                                                                                                                                                                                                                                                                                                                                                                                                                                                                                                                                                                                                                                                                                                                                                                                                                                                                                                                                                                                                                                                                                                                                                                                                                                                                                                                                                                                                                                                                                                                                                                                                                                                                                                                                                                                                                                                                                                                                                                                                                                                                                                                                                                                                                                                                                                                                                                                                                                                                                                                                                                                                                                                                                                                                                                                                                                                |             |         |             |               |                          |                                  |            |  |                   |        |       |        |       |        |                    |                                  |                         |   |     |   |     |      |                   |  |                    |     |      |    |     |       |                   |  |                       |   |             |   |            |               |                          |  |                      |     |    |    |    |      |                    |  |                                                                                                         |   |     |    |    |       |                   |  |                                              |   |    |   |     |      |                    |  |                    |   |    |   |    |       |                   |  |                    |   |     |   |     |      |                    |  |                   |    |      |    |     |       |                   |  |                  |   |    |   |    |      |                    |  |                          |  |             |  |            |              |                          |  |              |    |  |    |  |  |  |  |                                                                                                           |  |  |  |  |  |  |  |                                              |  |  |  |  |  |  |  |                         |  |  |  |  |  |  |  |                      |   |    |   |    |      |                   |  |                      |   |    |   |    |      |                    |  |                    |   |     |   |     |      |                    |  |                   |    |      |     |      |       |                   |  |                          |  |             |  |             |              |                          |  |              |    |  |     |  |  |  |  |                                                                                                         |  |  |  |  |  |  |  |                                              |  |  |  |  |  |  |  |                       |  |             |  |             |               |                          |  |              |     |  |     |  |  |  |  |                                                                                                            |  |  |  |  |  |  |  |                                              |  |  |  |  |  |  |  |                                                                                                |  |  |  |  |  |  |  |  |     |  |     |  |  |            |  |                   |        |       |        |       |        |                    |                                  |                      |   |    |   |     |      |                    |  |                    |   |     |   |     |      |                    |  |                   |     |      |    |     |       |                   |  |                       |  |             |  |            |               |                          |  |              |     |  |    |  |  |  |  |                                                                                                         |  |  |  |  |  |  |  |                                              |  |  |  |  |  |  |  |
| Test for overall effect: Z = 1.42 (P = 0.16)                                                               |                                                                                                                                                                                                                                                                                                                                                                                                                                                                                                                                                                                                                                                                                                                                                                                                                                                                                                                                                                                                                                                                                                                                                                                                                                                                                                                                                                                                                                                                                                                                                                                                                                                                                                                                                                                                                                                                                                                                                                                                                                                                                                                                                                                                                                                                                                                                                                                                                                                                                                                                                                                                                                                                                                                                                                                                                                                                                                                                                                                                                                                                                                                                                                                                                                                                                                                                                                                                                                                                                                                                                                                                                                                                                                                                                                                                                                                                                                                                                                                                                                                                                                                                                                                                                                                                                                                                                                                                                                                                                                                                                                                                                                                                                                                                                                                                                                                                                                                                                                                                                                                                                                                                                                |             |         |             |               |                          |                                  |            |  |                   |        |       |        |       |        |                    |                                  |                         |   |     |   |     |      |                   |  |                    |     |      |    |     |       |                   |  |                       |   |             |   |            |               |                          |  |                      |     |    |    |    |      |                    |  |                                                                                                         |   |     |    |    |       |                   |  |                                              |   |    |   |     |      |                    |  |                    |   |    |   |    |       |                   |  |                    |   |     |   |     |      |                    |  |                   |    |      |    |     |       |                   |  |                  |   |    |   |    |      |                    |  |                          |  |             |  |            |              |                          |  |              |    |  |    |  |  |  |  |                                                                                                           |  |  |  |  |  |  |  |                                              |  |  |  |  |  |  |  |                         |  |  |  |  |  |  |  |                      |   |    |   |    |      |                   |  |                      |   |    |   |    |      |                    |  |                    |   |     |   |     |      |                    |  |                   |    |      |     |      |       |                   |  |                          |  |             |  |             |              |                          |  |              |    |  |     |  |  |  |  |                                                                                                         |  |  |  |  |  |  |  |                                              |  |  |  |  |  |  |  |                       |  |             |  |             |               |                          |  |              |     |  |     |  |  |  |  |                                                                                                            |  |  |  |  |  |  |  |                                              |  |  |  |  |  |  |  |                                                                                                |  |  |  |  |  |  |  |  |     |  |     |  |  |            |  |                   |        |       |        |       |        |                    |                                  |                      |   |    |   |     |      |                    |  |                    |   |     |   |     |      |                    |  |                   |     |      |    |     |       |                   |  |                       |  |             |  |            |               |                          |  |              |     |  |    |  |  |  |  |                                                                                                         |  |  |  |  |  |  |  |                                              |  |  |  |  |  |  |  |
| F                                                                                                          | <p><b>Cerebrovascular Accidents</b></p> <p><b>Forest Plot of Cerebrovascular Accidents (Conventional Pairwise Meta-Analysis)</b></p> <table><tr><th></th><th colspan="2">BAA</th><th colspan="2">Control</th><th></th><th>Odds Ratio</th><th></th></tr><tr><th>Study or Subgroup</th><th>Events</th><th>Total</th><th>Events</th><th>Total</th><th>Weight</th><th>IV, Random, 95% CI</th><th>Odds Ratio<br/>IV, Random, 95% CI</th></tr><tr><td colspan="8"><b>1.1.1 BAA vs LAA</b></td></tr><tr><td>Albage et al, 2011</td><td>1</td><td>44</td><td>2</td><td>71</td><td>3.8%</td><td>0.80 [0.07, 9.12]</td><td></td></tr><tr><td>Bogachev et al, 2018</td><td>3</td><td>70</td><td>1</td><td>70</td><td>4.2%</td><td>3.09 [0.31, 30.45]</td><td></td></tr><tr><td>Charitos et al, 2015</td><td>1</td><td>29</td><td>0</td><td>22</td><td>2.3%</td><td>2.37 [0.09, 60.96]</td><td></td></tr><tr><td>Kim et al, 2011</td><td>3</td><td>199</td><td>14</td><td>85</td><td>10.1%</td><td>0.08 [0.02, 0.28]</td><td></td></tr><tr><td>McCarthy et al, 2010</td><td>2</td><td>91</td><td>1</td><td>175</td><td>3.8%</td><td>3.91 [0.35, 43.71]</td><td></td></tr><tr><td>Niv Ad et al, 2017</td><td>6</td><td>93</td><td>9</td><td>93</td><td>12.3%</td><td>0.64 [0.22, 1.89]</td><td></td></tr><tr><td>Stulak et al, 2014</td><td>6</td><td>514</td><td>0</td><td>110</td><td>2.8%</td><td>2.82 [0.16, 50.52]</td><td></td></tr><tr><td>Takai et al, 2017</td><td>68</td><td>1339</td><td>16</td><td>266</td><td>20.4%</td><td>0.84 [0.48, 1.47]</td><td></td></tr><tr><td>Yang et al, 2017</td><td>7</td><td>94</td><td>1</td><td>35</td><td>4.7%</td><td>2.74 [0.32, 23.08]</td><td></td></tr><tr><td><b>Subtotal (95% CI)</b></td><td></td><td><b>2473</b></td><td></td><td><b>927</b></td><td><b>64.5%</b></td><td><b>0.89 [0.39, 2.05]</b></td><td></td></tr><tr><td>Total events</td><td>97</td><td></td><td>44</td><td></td><td></td><td></td><td></td></tr><tr><td colspan="7">Heterogeneity: Tau<sup>2</sup> = 0.75; Chi<sup>2</sup> = 18.33, df = 8 (P = 0.02); I<sup>2</sup> = 56%</td><td></td></tr><tr><td colspan="7">Test for overall effect: Z = 0.28 (P = 0.78)</td><td></td></tr><tr><td colspan="8"><b>1.1.2 BAA vs PVI</b></td></tr><tr><td>Albrecht et al, 2009</td><td>1</td><td>20</td><td>2</td><td>20</td><td>3.7%</td><td>0.47 [0.04, 5.69]</td><td></td></tr><tr><td>McCarthy et al, 2010</td><td>2</td><td>91</td><td>0</td><td>50</td><td>2.5%</td><td>2.82 [0.13, 59.92]</td><td></td></tr><tr><td>Stulak et al, 2014</td><td>6</td><td>514</td><td>1</td><td>269</td><td>4.8%</td><td>3.17 [0.38, 26.43]</td><td></td></tr><tr><td>Takai et al, 2017</td><td>68</td><td>1339</td><td>108</td><td>1797</td><td>24.6%</td><td>0.84 [0.61, 1.14]</td><td></td></tr><tr><td><b>Subtotal (95% CI)</b></td><td></td><td><b>1964</b></td><td></td><td><b>2136</b></td><td><b>35.5%</b></td><td><b>0.86 [0.64, 1.17]</b></td><td></td></tr><tr><td>Total events</td><td>77</td><td></td><td>111</td><td></td><td></td><td></td><td></td></tr><tr><td colspan="7">Heterogeneity: Tau<sup>2</sup> = 0.00; Chi<sup>2</sup> = 2.28, df = 3 (P = 0.52); I<sup>2</sup> = 0%</td><td></td></tr><tr><td colspan="7">Test for overall effect: Z = 0.95 (P = 0.34)</td><td></td></tr><tr><td><b>Total (95% CI)</b></td><td></td><td><b>4437</b></td><td></td><td><b>3063</b></td><td><b>100.0%</b></td><td><b>0.86 [0.52, 1.44]</b></td><td></td></tr><tr><td>Total events</td><td>174</td><td></td><td>155</td><td></td><td></td><td></td><td></td></tr><tr><td colspan="7">Heterogeneity: Tau<sup>2</sup> = 0.25; Chi<sup>2</sup> = 20.94, df = 12 (P = 0.05); I<sup>2</sup> = 43%</td><td></td></tr><tr><td colspan="7">Test for overall effect: Z = 0.57 (P = 0.57)</td><td></td></tr><tr><td colspan="7">Test for subgroup differences: Chi<sup>2</sup> = 0.00, df = 1 (P = 0.95), I<sup>2</sup> = 0%</td><td></td></tr></table> <table><tr><th></th><th colspan="2">PVI</th><th colspan="2">LAA</th><th></th><th>Odds Ratio</th><th></th></tr><tr><th>Study or Subgroup</th><th>Events</th><th>Total</th><th>Events</th><th>Total</th><th>Weight</th><th>IV, Random, 95% CI</th><th>Odds Ratio<br/>IV, Random, 95% CI</th></tr><tr><td>McCarthy et al, 2010</td><td>0</td><td>50</td><td>1</td><td>175</td><td>2.7%</td><td>1.15 [0.05, 28.71]</td><td></td></tr><tr><td>Stulak et al, 2014</td><td>1</td><td>269</td><td>0</td><td>110</td><td>2.7%</td><td>1.23 [0.05, 30.54]</td><td></td></tr><tr><td>Takai et al, 2017</td><td>108</td><td>1797</td><td>16</td><td>266</td><td>94.6%</td><td>1.00 [0.58, 1.72]</td><td></td></tr><tr><td><b>Total (95% CI)</b></td><td></td><td><b>2116</b></td><td></td><td><b>551</b></td><td><b>100.0%</b></td><td><b>1.01 [0.60, 1.71]</b></td><td></td></tr><tr><td>Total events</td><td>109</td><td></td><td>17</td><td></td><td></td><td></td><td></td></tr><tr><td colspan="7">Heterogeneity: Tau<sup>2</sup> = 0.00; Chi<sup>2</sup> = 0.02, df = 2 (P = 0.99); I<sup>2</sup> = 0%</td><td></td></tr><tr><td colspan="7">Test for overall effect: Z = 0.03 (P = 0.97)</td><td></td></tr></table> |             | BAA     |             | Control       |                          |                                  | Odds Ratio |  | Study or Subgroup | Events | Total | Events | Total | Weight | IV, Random, 95% CI | Odds Ratio<br>IV, Random, 95% CI | <b>1.1.1 BAA vs LAA</b> |   |     |   |     |      |                   |  | Albage et al, 2011 | 1   | 44   | 2  | 71  | 3.8%  | 0.80 [0.07, 9.12] |  | Bogachev et al, 2018  | 3 | 70          | 1 | 70         | 4.2%          | 3.09 [0.31, 30.45]       |  | Charitos et al, 2015 | 1   | 29 | 0  | 22 | 2.3% | 2.37 [0.09, 60.96] |  | Kim et al, 2011                                                                                         | 3 | 199 | 14 | 85 | 10.1% | 0.08 [0.02, 0.28] |  | McCarthy et al, 2010                         | 2 | 91 | 1 | 175 | 3.8% | 3.91 [0.35, 43.71] |  | Niv Ad et al, 2017 | 6 | 93 | 9 | 93 | 12.3% | 0.64 [0.22, 1.89] |  | Stulak et al, 2014 | 6 | 514 | 0 | 110 | 2.8% | 2.82 [0.16, 50.52] |  | Takai et al, 2017 | 68 | 1339 | 16 | 266 | 20.4% | 0.84 [0.48, 1.47] |  | Yang et al, 2017 | 7 | 94 | 1 | 35 | 4.7% | 2.74 [0.32, 23.08] |  | <b>Subtotal (95% CI)</b> |  | <b>2473</b> |  | <b>927</b> | <b>64.5%</b> | <b>0.89 [0.39, 2.05]</b> |  | Total events | 97 |  | 44 |  |  |  |  | Heterogeneity: Tau <sup>2</sup> = 0.75; Chi <sup>2</sup> = 18.33, df = 8 (P = 0.02); I <sup>2</sup> = 56% |  |  |  |  |  |  |  | Test for overall effect: Z = 0.28 (P = 0.78) |  |  |  |  |  |  |  | <b>1.1.2 BAA vs PVI</b> |  |  |  |  |  |  |  | Albrecht et al, 2009 | 1 | 20 | 2 | 20 | 3.7% | 0.47 [0.04, 5.69] |  | McCarthy et al, 2010 | 2 | 91 | 0 | 50 | 2.5% | 2.82 [0.13, 59.92] |  | Stulak et al, 2014 | 6 | 514 | 1 | 269 | 4.8% | 3.17 [0.38, 26.43] |  | Takai et al, 2017 | 68 | 1339 | 108 | 1797 | 24.6% | 0.84 [0.61, 1.14] |  | <b>Subtotal (95% CI)</b> |  | <b>1964</b> |  | <b>2136</b> | <b>35.5%</b> | <b>0.86 [0.64, 1.17]</b> |  | Total events | 77 |  | 111 |  |  |  |  | Heterogeneity: Tau <sup>2</sup> = 0.00; Chi <sup>2</sup> = 2.28, df = 3 (P = 0.52); I <sup>2</sup> = 0% |  |  |  |  |  |  |  | Test for overall effect: Z = 0.95 (P = 0.34) |  |  |  |  |  |  |  | <b>Total (95% CI)</b> |  | <b>4437</b> |  | <b>3063</b> | <b>100.0%</b> | <b>0.86 [0.52, 1.44]</b> |  | Total events | 174 |  | 155 |  |  |  |  | Heterogeneity: Tau <sup>2</sup> = 0.25; Chi <sup>2</sup> = 20.94, df = 12 (P = 0.05); I <sup>2</sup> = 43% |  |  |  |  |  |  |  | Test for overall effect: Z = 0.57 (P = 0.57) |  |  |  |  |  |  |  | Test for subgroup differences: Chi <sup>2</sup> = 0.00, df = 1 (P = 0.95), I <sup>2</sup> = 0% |  |  |  |  |  |  |  |  | PVI |  | LAA |  |  | Odds Ratio |  | Study or Subgroup | Events | Total | Events | Total | Weight | IV, Random, 95% CI | Odds Ratio<br>IV, Random, 95% CI | McCarthy et al, 2010 | 0 | 50 | 1 | 175 | 2.7% | 1.15 [0.05, 28.71] |  | Stulak et al, 2014 | 1 | 269 | 0 | 110 | 2.7% | 1.23 [0.05, 30.54] |  | Takai et al, 2017 | 108 | 1797 | 16 | 266 | 94.6% | 1.00 [0.58, 1.72] |  | <b>Total (95% CI)</b> |  | <b>2116</b> |  | <b>551</b> | <b>100.0%</b> | <b>1.01 [0.60, 1.71]</b> |  | Total events | 109 |  | 17 |  |  |  |  | Heterogeneity: Tau <sup>2</sup> = 0.00; Chi <sup>2</sup> = 0.02, df = 2 (P = 0.99); I <sup>2</sup> = 0% |  |  |  |  |  |  |  | Test for overall effect: Z = 0.03 (P = 0.97) |  |  |  |  |  |  |  |
|                                                                                                            | BAA                                                                                                                                                                                                                                                                                                                                                                                                                                                                                                                                                                                                                                                                                                                                                                                                                                                                                                                                                                                                                                                                                                                                                                                                                                                                                                                                                                                                                                                                                                                                                                                                                                                                                                                                                                                                                                                                                                                                                                                                                                                                                                                                                                                                                                                                                                                                                                                                                                                                                                                                                                                                                                                                                                                                                                                                                                                                                                                                                                                                                                                                                                                                                                                                                                                                                                                                                                                                                                                                                                                                                                                                                                                                                                                                                                                                                                                                                                                                                                                                                                                                                                                                                                                                                                                                                                                                                                                                                                                                                                                                                                                                                                                                                                                                                                                                                                                                                                                                                                                                                                                                                                                                                            |             | Control |             |               | Odds Ratio               |                                  |            |  |                   |        |       |        |       |        |                    |                                  |                         |   |     |   |     |      |                   |  |                    |     |      |    |     |       |                   |  |                       |   |             |   |            |               |                          |  |                      |     |    |    |    |      |                    |  |                                                                                                         |   |     |    |    |       |                   |  |                                              |   |    |   |     |      |                    |  |                    |   |    |   |    |       |                   |  |                    |   |     |   |     |      |                    |  |                   |    |      |    |     |       |                   |  |                  |   |    |   |    |      |                    |  |                          |  |             |  |            |              |                          |  |              |    |  |    |  |  |  |  |                                                                                                           |  |  |  |  |  |  |  |                                              |  |  |  |  |  |  |  |                         |  |  |  |  |  |  |  |                      |   |    |   |    |      |                   |  |                      |   |    |   |    |      |                    |  |                    |   |     |   |     |      |                    |  |                   |    |      |     |      |       |                   |  |                          |  |             |  |             |              |                          |  |              |    |  |     |  |  |  |  |                                                                                                         |  |  |  |  |  |  |  |                                              |  |  |  |  |  |  |  |                       |  |             |  |             |               |                          |  |              |     |  |     |  |  |  |  |                                                                                                            |  |  |  |  |  |  |  |                                              |  |  |  |  |  |  |  |                                                                                                |  |  |  |  |  |  |  |  |     |  |     |  |  |            |  |                   |        |       |        |       |        |                    |                                  |                      |   |    |   |     |      |                    |  |                    |   |     |   |     |      |                    |  |                   |     |      |    |     |       |                   |  |                       |  |             |  |            |               |                          |  |              |     |  |    |  |  |  |  |                                                                                                         |  |  |  |  |  |  |  |                                              |  |  |  |  |  |  |  |
| Study or Subgroup                                                                                          | Events                                                                                                                                                                                                                                                                                                                                                                                                                                                                                                                                                                                                                                                                                                                                                                                                                                                                                                                                                                                                                                                                                                                                                                                                                                                                                                                                                                                                                                                                                                                                                                                                                                                                                                                                                                                                                                                                                                                                                                                                                                                                                                                                                                                                                                                                                                                                                                                                                                                                                                                                                                                                                                                                                                                                                                                                                                                                                                                                                                                                                                                                                                                                                                                                                                                                                                                                                                                                                                                                                                                                                                                                                                                                                                                                                                                                                                                                                                                                                                                                                                                                                                                                                                                                                                                                                                                                                                                                                                                                                                                                                                                                                                                                                                                                                                                                                                                                                                                                                                                                                                                                                                                                                         | Total       | Events  | Total       | Weight        | IV, Random, 95% CI       | Odds Ratio<br>IV, Random, 95% CI |            |  |                   |        |       |        |       |        |                    |                                  |                         |   |     |   |     |      |                   |  |                    |     |      |    |     |       |                   |  |                       |   |             |   |            |               |                          |  |                      |     |    |    |    |      |                    |  |                                                                                                         |   |     |    |    |       |                   |  |                                              |   |    |   |     |      |                    |  |                    |   |    |   |    |       |                   |  |                    |   |     |   |     |      |                    |  |                   |    |      |    |     |       |                   |  |                  |   |    |   |    |      |                    |  |                          |  |             |  |            |              |                          |  |              |    |  |    |  |  |  |  |                                                                                                           |  |  |  |  |  |  |  |                                              |  |  |  |  |  |  |  |                         |  |  |  |  |  |  |  |                      |   |    |   |    |      |                   |  |                      |   |    |   |    |      |                    |  |                    |   |     |   |     |      |                    |  |                   |    |      |     |      |       |                   |  |                          |  |             |  |             |              |                          |  |              |    |  |     |  |  |  |  |                                                                                                         |  |  |  |  |  |  |  |                                              |  |  |  |  |  |  |  |                       |  |             |  |             |               |                          |  |              |     |  |     |  |  |  |  |                                                                                                            |  |  |  |  |  |  |  |                                              |  |  |  |  |  |  |  |                                                                                                |  |  |  |  |  |  |  |  |     |  |     |  |  |            |  |                   |        |       |        |       |        |                    |                                  |                      |   |    |   |     |      |                    |  |                    |   |     |   |     |      |                    |  |                   |     |      |    |     |       |                   |  |                       |  |             |  |            |               |                          |  |              |     |  |    |  |  |  |  |                                                                                                         |  |  |  |  |  |  |  |                                              |  |  |  |  |  |  |  |
| <b>1.1.1 BAA vs LAA</b>                                                                                    |                                                                                                                                                                                                                                                                                                                                                                                                                                                                                                                                                                                                                                                                                                                                                                                                                                                                                                                                                                                                                                                                                                                                                                                                                                                                                                                                                                                                                                                                                                                                                                                                                                                                                                                                                                                                                                                                                                                                                                                                                                                                                                                                                                                                                                                                                                                                                                                                                                                                                                                                                                                                                                                                                                                                                                                                                                                                                                                                                                                                                                                                                                                                                                                                                                                                                                                                                                                                                                                                                                                                                                                                                                                                                                                                                                                                                                                                                                                                                                                                                                                                                                                                                                                                                                                                                                                                                                                                                                                                                                                                                                                                                                                                                                                                                                                                                                                                                                                                                                                                                                                                                                                                                                |             |         |             |               |                          |                                  |            |  |                   |        |       |        |       |        |                    |                                  |                         |   |     |   |     |      |                   |  |                    |     |      |    |     |       |                   |  |                       |   |             |   |            |               |                          |  |                      |     |    |    |    |      |                    |  |                                                                                                         |   |     |    |    |       |                   |  |                                              |   |    |   |     |      |                    |  |                    |   |    |   |    |       |                   |  |                    |   |     |   |     |      |                    |  |                   |    |      |    |     |       |                   |  |                  |   |    |   |    |      |                    |  |                          |  |             |  |            |              |                          |  |              |    |  |    |  |  |  |  |                                                                                                           |  |  |  |  |  |  |  |                                              |  |  |  |  |  |  |  |                         |  |  |  |  |  |  |  |                      |   |    |   |    |      |                   |  |                      |   |    |   |    |      |                    |  |                    |   |     |   |     |      |                    |  |                   |    |      |     |      |       |                   |  |                          |  |             |  |             |              |                          |  |              |    |  |     |  |  |  |  |                                                                                                         |  |  |  |  |  |  |  |                                              |  |  |  |  |  |  |  |                       |  |             |  |             |               |                          |  |              |     |  |     |  |  |  |  |                                                                                                            |  |  |  |  |  |  |  |                                              |  |  |  |  |  |  |  |                                                                                                |  |  |  |  |  |  |  |  |     |  |     |  |  |            |  |                   |        |       |        |       |        |                    |                                  |                      |   |    |   |     |      |                    |  |                    |   |     |   |     |      |                    |  |                   |     |      |    |     |       |                   |  |                       |  |             |  |            |               |                          |  |              |     |  |    |  |  |  |  |                                                                                                         |  |  |  |  |  |  |  |                                              |  |  |  |  |  |  |  |
| Albage et al, 2011                                                                                         | 1                                                                                                                                                                                                                                                                                                                                                                                                                                                                                                                                                                                                                                                                                                                                                                                                                                                                                                                                                                                                                                                                                                                                                                                                                                                                                                                                                                                                                                                                                                                                                                                                                                                                                                                                                                                                                                                                                                                                                                                                                                                                                                                                                                                                                                                                                                                                                                                                                                                                                                                                                                                                                                                                                                                                                                                                                                                                                                                                                                                                                                                                                                                                                                                                                                                                                                                                                                                                                                                                                                                                                                                                                                                                                                                                                                                                                                                                                                                                                                                                                                                                                                                                                                                                                                                                                                                                                                                                                                                                                                                                                                                                                                                                                                                                                                                                                                                                                                                                                                                                                                                                                                                                                              | 44          | 2       | 71          | 3.8%          | 0.80 [0.07, 9.12]        |                                  |            |  |                   |        |       |        |       |        |                    |                                  |                         |   |     |   |     |      |                   |  |                    |     |      |    |     |       |                   |  |                       |   |             |   |            |               |                          |  |                      |     |    |    |    |      |                    |  |                                                                                                         |   |     |    |    |       |                   |  |                                              |   |    |   |     |      |                    |  |                    |   |    |   |    |       |                   |  |                    |   |     |   |     |      |                    |  |                   |    |      |    |     |       |                   |  |                  |   |    |   |    |      |                    |  |                          |  |             |  |            |              |                          |  |              |    |  |    |  |  |  |  |                                                                                                           |  |  |  |  |  |  |  |                                              |  |  |  |  |  |  |  |                         |  |  |  |  |  |  |  |                      |   |    |   |    |      |                   |  |                      |   |    |   |    |      |                    |  |                    |   |     |   |     |      |                    |  |                   |    |      |     |      |       |                   |  |                          |  |             |  |             |              |                          |  |              |    |  |     |  |  |  |  |                                                                                                         |  |  |  |  |  |  |  |                                              |  |  |  |  |  |  |  |                       |  |             |  |             |               |                          |  |              |     |  |     |  |  |  |  |                                                                                                            |  |  |  |  |  |  |  |                                              |  |  |  |  |  |  |  |                                                                                                |  |  |  |  |  |  |  |  |     |  |     |  |  |            |  |                   |        |       |        |       |        |                    |                                  |                      |   |    |   |     |      |                    |  |                    |   |     |   |     |      |                    |  |                   |     |      |    |     |       |                   |  |                       |  |             |  |            |               |                          |  |              |     |  |    |  |  |  |  |                                                                                                         |  |  |  |  |  |  |  |                                              |  |  |  |  |  |  |  |
| Bogachev et al, 2018                                                                                       | 3                                                                                                                                                                                                                                                                                                                                                                                                                                                                                                                                                                                                                                                                                                                                                                                                                                                                                                                                                                                                                                                                                                                                                                                                                                                                                                                                                                                                                                                                                                                                                                                                                                                                                                                                                                                                                                                                                                                                                                                                                                                                                                                                                                                                                                                                                                                                                                                                                                                                                                                                                                                                                                                                                                                                                                                                                                                                                                                                                                                                                                                                                                                                                                                                                                                                                                                                                                                                                                                                                                                                                                                                                                                                                                                                                                                                                                                                                                                                                                                                                                                                                                                                                                                                                                                                                                                                                                                                                                                                                                                                                                                                                                                                                                                                                                                                                                                                                                                                                                                                                                                                                                                                                              | 70          | 1       | 70          | 4.2%          | 3.09 [0.31, 30.45]       |                                  |            |  |                   |        |       |        |       |        |                    |                                  |                         |   |     |   |     |      |                   |  |                    |     |      |    |     |       |                   |  |                       |   |             |   |            |               |                          |  |                      |     |    |    |    |      |                    |  |                                                                                                         |   |     |    |    |       |                   |  |                                              |   |    |   |     |      |                    |  |                    |   |    |   |    |       |                   |  |                    |   |     |   |     |      |                    |  |                   |    |      |    |     |       |                   |  |                  |   |    |   |    |      |                    |  |                          |  |             |  |            |              |                          |  |              |    |  |    |  |  |  |  |                                                                                                           |  |  |  |  |  |  |  |                                              |  |  |  |  |  |  |  |                         |  |  |  |  |  |  |  |                      |   |    |   |    |      |                   |  |                      |   |    |   |    |      |                    |  |                    |   |     |   |     |      |                    |  |                   |    |      |     |      |       |                   |  |                          |  |             |  |             |              |                          |  |              |    |  |     |  |  |  |  |                                                                                                         |  |  |  |  |  |  |  |                                              |  |  |  |  |  |  |  |                       |  |             |  |             |               |                          |  |              |     |  |     |  |  |  |  |                                                                                                            |  |  |  |  |  |  |  |                                              |  |  |  |  |  |  |  |                                                                                                |  |  |  |  |  |  |  |  |     |  |     |  |  |            |  |                   |        |       |        |       |        |                    |                                  |                      |   |    |   |     |      |                    |  |                    |   |     |   |     |      |                    |  |                   |     |      |    |     |       |                   |  |                       |  |             |  |            |               |                          |  |              |     |  |    |  |  |  |  |                                                                                                         |  |  |  |  |  |  |  |                                              |  |  |  |  |  |  |  |
| Charitos et al, 2015                                                                                       | 1                                                                                                                                                                                                                                                                                                                                                                                                                                                                                                                                                                                                                                                                                                                                                                                                                                                                                                                                                                                                                                                                                                                                                                                                                                                                                                                                                                                                                                                                                                                                                                                                                                                                                                                                                                                                                                                                                                                                                                                                                                                                                                                                                                                                                                                                                                                                                                                                                                                                                                                                                                                                                                                                                                                                                                                                                                                                                                                                                                                                                                                                                                                                                                                                                                                                                                                                                                                                                                                                                                                                                                                                                                                                                                                                                                                                                                                                                                                                                                                                                                                                                                                                                                                                                                                                                                                                                                                                                                                                                                                                                                                                                                                                                                                                                                                                                                                                                                                                                                                                                                                                                                                                                              | 29          | 0       | 22          | 2.3%          | 2.37 [0.09, 60.96]       |                                  |            |  |                   |        |       |        |       |        |                    |                                  |                         |   |     |   |     |      |                   |  |                    |     |      |    |     |       |                   |  |                       |   |             |   |            |               |                          |  |                      |     |    |    |    |      |                    |  |                                                                                                         |   |     |    |    |       |                   |  |                                              |   |    |   |     |      |                    |  |                    |   |    |   |    |       |                   |  |                    |   |     |   |     |      |                    |  |                   |    |      |    |     |       |                   |  |                  |   |    |   |    |      |                    |  |                          |  |             |  |            |              |                          |  |              |    |  |    |  |  |  |  |                                                                                                           |  |  |  |  |  |  |  |                                              |  |  |  |  |  |  |  |                         |  |  |  |  |  |  |  |                      |   |    |   |    |      |                   |  |                      |   |    |   |    |      |                    |  |                    |   |     |   |     |      |                    |  |                   |    |      |     |      |       |                   |  |                          |  |             |  |             |              |                          |  |              |    |  |     |  |  |  |  |                                                                                                         |  |  |  |  |  |  |  |                                              |  |  |  |  |  |  |  |                       |  |             |  |             |               |                          |  |              |     |  |     |  |  |  |  |                                                                                                            |  |  |  |  |  |  |  |                                              |  |  |  |  |  |  |  |                                                                                                |  |  |  |  |  |  |  |  |     |  |     |  |  |            |  |                   |        |       |        |       |        |                    |                                  |                      |   |    |   |     |      |                    |  |                    |   |     |   |     |      |                    |  |                   |     |      |    |     |       |                   |  |                       |  |             |  |            |               |                          |  |              |     |  |    |  |  |  |  |                                                                                                         |  |  |  |  |  |  |  |                                              |  |  |  |  |  |  |  |
| Kim et al, 2011                                                                                            | 3                                                                                                                                                                                                                                                                                                                                                                                                                                                                                                                                                                                                                                                                                                                                                                                                                                                                                                                                                                                                                                                                                                                                                                                                                                                                                                                                                                                                                                                                                                                                                                                                                                                                                                                                                                                                                                                                                                                                                                                                                                                                                                                                                                                                                                                                                                                                                                                                                                                                                                                                                                                                                                                                                                                                                                                                                                                                                                                                                                                                                                                                                                                                                                                                                                                                                                                                                                                                                                                                                                                                                                                                                                                                                                                                                                                                                                                                                                                                                                                                                                                                                                                                                                                                                                                                                                                                                                                                                                                                                                                                                                                                                                                                                                                                                                                                                                                                                                                                                                                                                                                                                                                                                              | 199         | 14      | 85          | 10.1%         | 0.08 [0.02, 0.28]        |                                  |            |  |                   |        |       |        |       |        |                    |                                  |                         |   |     |   |     |      |                   |  |                    |     |      |    |     |       |                   |  |                       |   |             |   |            |               |                          |  |                      |     |    |    |    |      |                    |  |                                                                                                         |   |     |    |    |       |                   |  |                                              |   |    |   |     |      |                    |  |                    |   |    |   |    |       |                   |  |                    |   |     |   |     |      |                    |  |                   |    |      |    |     |       |                   |  |                  |   |    |   |    |      |                    |  |                          |  |             |  |            |              |                          |  |              |    |  |    |  |  |  |  |                                                                                                           |  |  |  |  |  |  |  |                                              |  |  |  |  |  |  |  |                         |  |  |  |  |  |  |  |                      |   |    |   |    |      |                   |  |                      |   |    |   |    |      |                    |  |                    |   |     |   |     |      |                    |  |                   |    |      |     |      |       |                   |  |                          |  |             |  |             |              |                          |  |              |    |  |     |  |  |  |  |                                                                                                         |  |  |  |  |  |  |  |                                              |  |  |  |  |  |  |  |                       |  |             |  |             |               |                          |  |              |     |  |     |  |  |  |  |                                                                                                            |  |  |  |  |  |  |  |                                              |  |  |  |  |  |  |  |                                                                                                |  |  |  |  |  |  |  |  |     |  |     |  |  |            |  |                   |        |       |        |       |        |                    |                                  |                      |   |    |   |     |      |                    |  |                    |   |     |   |     |      |                    |  |                   |     |      |    |     |       |                   |  |                       |  |             |  |            |               |                          |  |              |     |  |    |  |  |  |  |                                                                                                         |  |  |  |  |  |  |  |                                              |  |  |  |  |  |  |  |
| McCarthy et al, 2010                                                                                       | 2                                                                                                                                                                                                                                                                                                                                                                                                                                                                                                                                                                                                                                                                                                                                                                                                                                                                                                                                                                                                                                                                                                                                                                                                                                                                                                                                                                                                                                                                                                                                                                                                                                                                                                                                                                                                                                                                                                                                                                                                                                                                                                                                                                                                                                                                                                                                                                                                                                                                                                                                                                                                                                                                                                                                                                                                                                                                                                                                                                                                                                                                                                                                                                                                                                                                                                                                                                                                                                                                                                                                                                                                                                                                                                                                                                                                                                                                                                                                                                                                                                                                                                                                                                                                                                                                                                                                                                                                                                                                                                                                                                                                                                                                                                                                                                                                                                                                                                                                                                                                                                                                                                                                                              | 91          | 1       | 175         | 3.8%          | 3.91 [0.35, 43.71]       |                                  |            |  |                   |        |       |        |       |        |                    |                                  |                         |   |     |   |     |      |                   |  |                    |     |      |    |     |       |                   |  |                       |   |             |   |            |               |                          |  |                      |     |    |    |    |      |                    |  |                                                                                                         |   |     |    |    |       |                   |  |                                              |   |    |   |     |      |                    |  |                    |   |    |   |    |       |                   |  |                    |   |     |   |     |      |                    |  |                   |    |      |    |     |       |                   |  |                  |   |    |   |    |      |                    |  |                          |  |             |  |            |              |                          |  |              |    |  |    |  |  |  |  |                                                                                                           |  |  |  |  |  |  |  |                                              |  |  |  |  |  |  |  |                         |  |  |  |  |  |  |  |                      |   |    |   |    |      |                   |  |                      |   |    |   |    |      |                    |  |                    |   |     |   |     |      |                    |  |                   |    |      |     |      |       |                   |  |                          |  |             |  |             |              |                          |  |              |    |  |     |  |  |  |  |                                                                                                         |  |  |  |  |  |  |  |                                              |  |  |  |  |  |  |  |                       |  |             |  |             |               |                          |  |              |     |  |     |  |  |  |  |                                                                                                            |  |  |  |  |  |  |  |                                              |  |  |  |  |  |  |  |                                                                                                |  |  |  |  |  |  |  |  |     |  |     |  |  |            |  |                   |        |       |        |       |        |                    |                                  |                      |   |    |   |     |      |                    |  |                    |   |     |   |     |      |                    |  |                   |     |      |    |     |       |                   |  |                       |  |             |  |            |               |                          |  |              |     |  |    |  |  |  |  |                                                                                                         |  |  |  |  |  |  |  |                                              |  |  |  |  |  |  |  |
| Niv Ad et al, 2017                                                                                         | 6                                                                                                                                                                                                                                                                                                                                                                                                                                                                                                                                                                                                                                                                                                                                                                                                                                                                                                                                                                                                                                                                                                                                                                                                                                                                                                                                                                                                                                                                                                                                                                                                                                                                                                                                                                                                                                                                                                                                                                                                                                                                                                                                                                                                                                                                                                                                                                                                                                                                                                                                                                                                                                                                                                                                                                                                                                                                                                                                                                                                                                                                                                                                                                                                                                                                                                                                                                                                                                                                                                                                                                                                                                                                                                                                                                                                                                                                                                                                                                                                                                                                                                                                                                                                                                                                                                                                                                                                                                                                                                                                                                                                                                                                                                                                                                                                                                                                                                                                                                                                                                                                                                                                                              | 93          | 9       | 93          | 12.3%         | 0.64 [0.22, 1.89]        |                                  |            |  |                   |        |       |        |       |        |                    |                                  |                         |   |     |   |     |      |                   |  |                    |     |      |    |     |       |                   |  |                       |   |             |   |            |               |                          |  |                      |     |    |    |    |      |                    |  |                                                                                                         |   |     |    |    |       |                   |  |                                              |   |    |   |     |      |                    |  |                    |   |    |   |    |       |                   |  |                    |   |     |   |     |      |                    |  |                   |    |      |    |     |       |                   |  |                  |   |    |   |    |      |                    |  |                          |  |             |  |            |              |                          |  |              |    |  |    |  |  |  |  |                                                                                                           |  |  |  |  |  |  |  |                                              |  |  |  |  |  |  |  |                         |  |  |  |  |  |  |  |                      |   |    |   |    |      |                   |  |                      |   |    |   |    |      |                    |  |                    |   |     |   |     |      |                    |  |                   |    |      |     |      |       |                   |  |                          |  |             |  |             |              |                          |  |              |    |  |     |  |  |  |  |                                                                                                         |  |  |  |  |  |  |  |                                              |  |  |  |  |  |  |  |                       |  |             |  |             |               |                          |  |              |     |  |     |  |  |  |  |                                                                                                            |  |  |  |  |  |  |  |                                              |  |  |  |  |  |  |  |                                                                                                |  |  |  |  |  |  |  |  |     |  |     |  |  |            |  |                   |        |       |        |       |        |                    |                                  |                      |   |    |   |     |      |                    |  |                    |   |     |   |     |      |                    |  |                   |     |      |    |     |       |                   |  |                       |  |             |  |            |               |                          |  |              |     |  |    |  |  |  |  |                                                                                                         |  |  |  |  |  |  |  |                                              |  |  |  |  |  |  |  |
| Stulak et al, 2014                                                                                         | 6                                                                                                                                                                                                                                                                                                                                                                                                                                                                                                                                                                                                                                                                                                                                                                                                                                                                                                                                                                                                                                                                                                                                                                                                                                                                                                                                                                                                                                                                                                                                                                                                                                                                                                                                                                                                                                                                                                                                                                                                                                                                                                                                                                                                                                                                                                                                                                                                                                                                                                                                                                                                                                                                                                                                                                                                                                                                                                                                                                                                                                                                                                                                                                                                                                                                                                                                                                                                                                                                                                                                                                                                                                                                                                                                                                                                                                                                                                                                                                                                                                                                                                                                                                                                                                                                                                                                                                                                                                                                                                                                                                                                                                                                                                                                                                                                                                                                                                                                                                                                                                                                                                                                                              | 514         | 0       | 110         | 2.8%          | 2.82 [0.16, 50.52]       |                                  |            |  |                   |        |       |        |       |        |                    |                                  |                         |   |     |   |     |      |                   |  |                    |     |      |    |     |       |                   |  |                       |   |             |   |            |               |                          |  |                      |     |    |    |    |      |                    |  |                                                                                                         |   |     |    |    |       |                   |  |                                              |   |    |   |     |      |                    |  |                    |   |    |   |    |       |                   |  |                    |   |     |   |     |      |                    |  |                   |    |      |    |     |       |                   |  |                  |   |    |   |    |      |                    |  |                          |  |             |  |            |              |                          |  |              |    |  |    |  |  |  |  |                                                                                                           |  |  |  |  |  |  |  |                                              |  |  |  |  |  |  |  |                         |  |  |  |  |  |  |  |                      |   |    |   |    |      |                   |  |                      |   |    |   |    |      |                    |  |                    |   |     |   |     |      |                    |  |                   |    |      |     |      |       |                   |  |                          |  |             |  |             |              |                          |  |              |    |  |     |  |  |  |  |                                                                                                         |  |  |  |  |  |  |  |                                              |  |  |  |  |  |  |  |                       |  |             |  |             |               |                          |  |              |     |  |     |  |  |  |  |                                                                                                            |  |  |  |  |  |  |  |                                              |  |  |  |  |  |  |  |                                                                                                |  |  |  |  |  |  |  |  |     |  |     |  |  |            |  |                   |        |       |        |       |        |                    |                                  |                      |   |    |   |     |      |                    |  |                    |   |     |   |     |      |                    |  |                   |     |      |    |     |       |                   |  |                       |  |             |  |            |               |                          |  |              |     |  |    |  |  |  |  |                                                                                                         |  |  |  |  |  |  |  |                                              |  |  |  |  |  |  |  |
| Takai et al, 2017                                                                                          | 68                                                                                                                                                                                                                                                                                                                                                                                                                                                                                                                                                                                                                                                                                                                                                                                                                                                                                                                                                                                                                                                                                                                                                                                                                                                                                                                                                                                                                                                                                                                                                                                                                                                                                                                                                                                                                                                                                                                                                                                                                                                                                                                                                                                                                                                                                                                                                                                                                                                                                                                                                                                                                                                                                                                                                                                                                                                                                                                                                                                                                                                                                                                                                                                                                                                                                                                                                                                                                                                                                                                                                                                                                                                                                                                                                                                                                                                                                                                                                                                                                                                                                                                                                                                                                                                                                                                                                                                                                                                                                                                                                                                                                                                                                                                                                                                                                                                                                                                                                                                                                                                                                                                                                             | 1339        | 16      | 266         | 20.4%         | 0.84 [0.48, 1.47]        |                                  |            |  |                   |        |       |        |       |        |                    |                                  |                         |   |     |   |     |      |                   |  |                    |     |      |    |     |       |                   |  |                       |   |             |   |            |               |                          |  |                      |     |    |    |    |      |                    |  |                                                                                                         |   |     |    |    |       |                   |  |                                              |   |    |   |     |      |                    |  |                    |   |    |   |    |       |                   |  |                    |   |     |   |     |      |                    |  |                   |    |      |    |     |       |                   |  |                  |   |    |   |    |      |                    |  |                          |  |             |  |            |              |                          |  |              |    |  |    |  |  |  |  |                                                                                                           |  |  |  |  |  |  |  |                                              |  |  |  |  |  |  |  |                         |  |  |  |  |  |  |  |                      |   |    |   |    |      |                   |  |                      |   |    |   |    |      |                    |  |                    |   |     |   |     |      |                    |  |                   |    |      |     |      |       |                   |  |                          |  |             |  |             |              |                          |  |              |    |  |     |  |  |  |  |                                                                                                         |  |  |  |  |  |  |  |                                              |  |  |  |  |  |  |  |                       |  |             |  |             |               |                          |  |              |     |  |     |  |  |  |  |                                                                                                            |  |  |  |  |  |  |  |                                              |  |  |  |  |  |  |  |                                                                                                |  |  |  |  |  |  |  |  |     |  |     |  |  |            |  |                   |        |       |        |       |        |                    |                                  |                      |   |    |   |     |      |                    |  |                    |   |     |   |     |      |                    |  |                   |     |      |    |     |       |                   |  |                       |  |             |  |            |               |                          |  |              |     |  |    |  |  |  |  |                                                                                                         |  |  |  |  |  |  |  |                                              |  |  |  |  |  |  |  |
| Yang et al, 2017                                                                                           | 7                                                                                                                                                                                                                                                                                                                                                                                                                                                                                                                                                                                                                                                                                                                                                                                                                                                                                                                                                                                                                                                                                                                                                                                                                                                                                                                                                                                                                                                                                                                                                                                                                                                                                                                                                                                                                                                                                                                                                                                                                                                                                                                                                                                                                                                                                                                                                                                                                                                                                                                                                                                                                                                                                                                                                                                                                                                                                                                                                                                                                                                                                                                                                                                                                                                                                                                                                                                                                                                                                                                                                                                                                                                                                                                                                                                                                                                                                                                                                                                                                                                                                                                                                                                                                                                                                                                                                                                                                                                                                                                                                                                                                                                                                                                                                                                                                                                                                                                                                                                                                                                                                                                                                              | 94          | 1       | 35          | 4.7%          | 2.74 [0.32, 23.08]       |                                  |            |  |                   |        |       |        |       |        |                    |                                  |                         |   |     |   |     |      |                   |  |                    |     |      |    |     |       |                   |  |                       |   |             |   |            |               |                          |  |                      |     |    |    |    |      |                    |  |                                                                                                         |   |     |    |    |       |                   |  |                                              |   |    |   |     |      |                    |  |                    |   |    |   |    |       |                   |  |                    |   |     |   |     |      |                    |  |                   |    |      |    |     |       |                   |  |                  |   |    |   |    |      |                    |  |                          |  |             |  |            |              |                          |  |              |    |  |    |  |  |  |  |                                                                                                           |  |  |  |  |  |  |  |                                              |  |  |  |  |  |  |  |                         |  |  |  |  |  |  |  |                      |   |    |   |    |      |                   |  |                      |   |    |   |    |      |                    |  |                    |   |     |   |     |      |                    |  |                   |    |      |     |      |       |                   |  |                          |  |             |  |             |              |                          |  |              |    |  |     |  |  |  |  |                                                                                                         |  |  |  |  |  |  |  |                                              |  |  |  |  |  |  |  |                       |  |             |  |             |               |                          |  |              |     |  |     |  |  |  |  |                                                                                                            |  |  |  |  |  |  |  |                                              |  |  |  |  |  |  |  |                                                                                                |  |  |  |  |  |  |  |  |     |  |     |  |  |            |  |                   |        |       |        |       |        |                    |                                  |                      |   |    |   |     |      |                    |  |                    |   |     |   |     |      |                    |  |                   |     |      |    |     |       |                   |  |                       |  |             |  |            |               |                          |  |              |     |  |    |  |  |  |  |                                                                                                         |  |  |  |  |  |  |  |                                              |  |  |  |  |  |  |  |
| <b>Subtotal (95% CI)</b>                                                                                   |                                                                                                                                                                                                                                                                                                                                                                                                                                                                                                                                                                                                                                                                                                                                                                                                                                                                                                                                                                                                                                                                                                                                                                                                                                                                                                                                                                                                                                                                                                                                                                                                                                                                                                                                                                                                                                                                                                                                                                                                                                                                                                                                                                                                                                                                                                                                                                                                                                                                                                                                                                                                                                                                                                                                                                                                                                                                                                                                                                                                                                                                                                                                                                                                                                                                                                                                                                                                                                                                                                                                                                                                                                                                                                                                                                                                                                                                                                                                                                                                                                                                                                                                                                                                                                                                                                                                                                                                                                                                                                                                                                                                                                                                                                                                                                                                                                                                                                                                                                                                                                                                                                                                                                | <b>2473</b> |         | <b>927</b>  | <b>64.5%</b>  | <b>0.89 [0.39, 2.05]</b> |                                  |            |  |                   |        |       |        |       |        |                    |                                  |                         |   |     |   |     |      |                   |  |                    |     |      |    |     |       |                   |  |                       |   |             |   |            |               |                          |  |                      |     |    |    |    |      |                    |  |                                                                                                         |   |     |    |    |       |                   |  |                                              |   |    |   |     |      |                    |  |                    |   |    |   |    |       |                   |  |                    |   |     |   |     |      |                    |  |                   |    |      |    |     |       |                   |  |                  |   |    |   |    |      |                    |  |                          |  |             |  |            |              |                          |  |              |    |  |    |  |  |  |  |                                                                                                           |  |  |  |  |  |  |  |                                              |  |  |  |  |  |  |  |                         |  |  |  |  |  |  |  |                      |   |    |   |    |      |                   |  |                      |   |    |   |    |      |                    |  |                    |   |     |   |     |      |                    |  |                   |    |      |     |      |       |                   |  |                          |  |             |  |             |              |                          |  |              |    |  |     |  |  |  |  |                                                                                                         |  |  |  |  |  |  |  |                                              |  |  |  |  |  |  |  |                       |  |             |  |             |               |                          |  |              |     |  |     |  |  |  |  |                                                                                                            |  |  |  |  |  |  |  |                                              |  |  |  |  |  |  |  |                                                                                                |  |  |  |  |  |  |  |  |     |  |     |  |  |            |  |                   |        |       |        |       |        |                    |                                  |                      |   |    |   |     |      |                    |  |                    |   |     |   |     |      |                    |  |                   |     |      |    |     |       |                   |  |                       |  |             |  |            |               |                          |  |              |     |  |    |  |  |  |  |                                                                                                         |  |  |  |  |  |  |  |                                              |  |  |  |  |  |  |  |
| Total events                                                                                               | 97                                                                                                                                                                                                                                                                                                                                                                                                                                                                                                                                                                                                                                                                                                                                                                                                                                                                                                                                                                                                                                                                                                                                                                                                                                                                                                                                                                                                                                                                                                                                                                                                                                                                                                                                                                                                                                                                                                                                                                                                                                                                                                                                                                                                                                                                                                                                                                                                                                                                                                                                                                                                                                                                                                                                                                                                                                                                                                                                                                                                                                                                                                                                                                                                                                                                                                                                                                                                                                                                                                                                                                                                                                                                                                                                                                                                                                                                                                                                                                                                                                                                                                                                                                                                                                                                                                                                                                                                                                                                                                                                                                                                                                                                                                                                                                                                                                                                                                                                                                                                                                                                                                                                                             |             | 44      |             |               |                          |                                  |            |  |                   |        |       |        |       |        |                    |                                  |                         |   |     |   |     |      |                   |  |                    |     |      |    |     |       |                   |  |                       |   |             |   |            |               |                          |  |                      |     |    |    |    |      |                    |  |                                                                                                         |   |     |    |    |       |                   |  |                                              |   |    |   |     |      |                    |  |                    |   |    |   |    |       |                   |  |                    |   |     |   |     |      |                    |  |                   |    |      |    |     |       |                   |  |                  |   |    |   |    |      |                    |  |                          |  |             |  |            |              |                          |  |              |    |  |    |  |  |  |  |                                                                                                           |  |  |  |  |  |  |  |                                              |  |  |  |  |  |  |  |                         |  |  |  |  |  |  |  |                      |   |    |   |    |      |                   |  |                      |   |    |   |    |      |                    |  |                    |   |     |   |     |      |                    |  |                   |    |      |     |      |       |                   |  |                          |  |             |  |             |              |                          |  |              |    |  |     |  |  |  |  |                                                                                                         |  |  |  |  |  |  |  |                                              |  |  |  |  |  |  |  |                       |  |             |  |             |               |                          |  |              |     |  |     |  |  |  |  |                                                                                                            |  |  |  |  |  |  |  |                                              |  |  |  |  |  |  |  |                                                                                                |  |  |  |  |  |  |  |  |     |  |     |  |  |            |  |                   |        |       |        |       |        |                    |                                  |                      |   |    |   |     |      |                    |  |                    |   |     |   |     |      |                    |  |                   |     |      |    |     |       |                   |  |                       |  |             |  |            |               |                          |  |              |     |  |    |  |  |  |  |                                                                                                         |  |  |  |  |  |  |  |                                              |  |  |  |  |  |  |  |
| Heterogeneity: Tau <sup>2</sup> = 0.75; Chi <sup>2</sup> = 18.33, df = 8 (P = 0.02); I <sup>2</sup> = 56%  |                                                                                                                                                                                                                                                                                                                                                                                                                                                                                                                                                                                                                                                                                                                                                                                                                                                                                                                                                                                                                                                                                                                                                                                                                                                                                                                                                                                                                                                                                                                                                                                                                                                                                                                                                                                                                                                                                                                                                                                                                                                                                                                                                                                                                                                                                                                                                                                                                                                                                                                                                                                                                                                                                                                                                                                                                                                                                                                                                                                                                                                                                                                                                                                                                                                                                                                                                                                                                                                                                                                                                                                                                                                                                                                                                                                                                                                                                                                                                                                                                                                                                                                                                                                                                                                                                                                                                                                                                                                                                                                                                                                                                                                                                                                                                                                                                                                                                                                                                                                                                                                                                                                                                                |             |         |             |               |                          |                                  |            |  |                   |        |       |        |       |        |                    |                                  |                         |   |     |   |     |      |                   |  |                    |     |      |    |     |       |                   |  |                       |   |             |   |            |               |                          |  |                      |     |    |    |    |      |                    |  |                                                                                                         |   |     |    |    |       |                   |  |                                              |   |    |   |     |      |                    |  |                    |   |    |   |    |       |                   |  |                    |   |     |   |     |      |                    |  |                   |    |      |    |     |       |                   |  |                  |   |    |   |    |      |                    |  |                          |  |             |  |            |              |                          |  |              |    |  |    |  |  |  |  |                                                                                                           |  |  |  |  |  |  |  |                                              |  |  |  |  |  |  |  |                         |  |  |  |  |  |  |  |                      |   |    |   |    |      |                   |  |                      |   |    |   |    |      |                    |  |                    |   |     |   |     |      |                    |  |                   |    |      |     |      |       |                   |  |                          |  |             |  |             |              |                          |  |              |    |  |     |  |  |  |  |                                                                                                         |  |  |  |  |  |  |  |                                              |  |  |  |  |  |  |  |                       |  |             |  |             |               |                          |  |              |     |  |     |  |  |  |  |                                                                                                            |  |  |  |  |  |  |  |                                              |  |  |  |  |  |  |  |                                                                                                |  |  |  |  |  |  |  |  |     |  |     |  |  |            |  |                   |        |       |        |       |        |                    |                                  |                      |   |    |   |     |      |                    |  |                    |   |     |   |     |      |                    |  |                   |     |      |    |     |       |                   |  |                       |  |             |  |            |               |                          |  |              |     |  |    |  |  |  |  |                                                                                                         |  |  |  |  |  |  |  |                                              |  |  |  |  |  |  |  |
| Test for overall effect: Z = 0.28 (P = 0.78)                                                               |                                                                                                                                                                                                                                                                                                                                                                                                                                                                                                                                                                                                                                                                                                                                                                                                                                                                                                                                                                                                                                                                                                                                                                                                                                                                                                                                                                                                                                                                                                                                                                                                                                                                                                                                                                                                                                                                                                                                                                                                                                                                                                                                                                                                                                                                                                                                                                                                                                                                                                                                                                                                                                                                                                                                                                                                                                                                                                                                                                                                                                                                                                                                                                                                                                                                                                                                                                                                                                                                                                                                                                                                                                                                                                                                                                                                                                                                                                                                                                                                                                                                                                                                                                                                                                                                                                                                                                                                                                                                                                                                                                                                                                                                                                                                                                                                                                                                                                                                                                                                                                                                                                                                                                |             |         |             |               |                          |                                  |            |  |                   |        |       |        |       |        |                    |                                  |                         |   |     |   |     |      |                   |  |                    |     |      |    |     |       |                   |  |                       |   |             |   |            |               |                          |  |                      |     |    |    |    |      |                    |  |                                                                                                         |   |     |    |    |       |                   |  |                                              |   |    |   |     |      |                    |  |                    |   |    |   |    |       |                   |  |                    |   |     |   |     |      |                    |  |                   |    |      |    |     |       |                   |  |                  |   |    |   |    |      |                    |  |                          |  |             |  |            |              |                          |  |              |    |  |    |  |  |  |  |                                                                                                           |  |  |  |  |  |  |  |                                              |  |  |  |  |  |  |  |                         |  |  |  |  |  |  |  |                      |   |    |   |    |      |                   |  |                      |   |    |   |    |      |                    |  |                    |   |     |   |     |      |                    |  |                   |    |      |     |      |       |                   |  |                          |  |             |  |             |              |                          |  |              |    |  |     |  |  |  |  |                                                                                                         |  |  |  |  |  |  |  |                                              |  |  |  |  |  |  |  |                       |  |             |  |             |               |                          |  |              |     |  |     |  |  |  |  |                                                                                                            |  |  |  |  |  |  |  |                                              |  |  |  |  |  |  |  |                                                                                                |  |  |  |  |  |  |  |  |     |  |     |  |  |            |  |                   |        |       |        |       |        |                    |                                  |                      |   |    |   |     |      |                    |  |                    |   |     |   |     |      |                    |  |                   |     |      |    |     |       |                   |  |                       |  |             |  |            |               |                          |  |              |     |  |    |  |  |  |  |                                                                                                         |  |  |  |  |  |  |  |                                              |  |  |  |  |  |  |  |
| <b>1.1.2 BAA vs PVI</b>                                                                                    |                                                                                                                                                                                                                                                                                                                                                                                                                                                                                                                                                                                                                                                                                                                                                                                                                                                                                                                                                                                                                                                                                                                                                                                                                                                                                                                                                                                                                                                                                                                                                                                                                                                                                                                                                                                                                                                                                                                                                                                                                                                                                                                                                                                                                                                                                                                                                                                                                                                                                                                                                                                                                                                                                                                                                                                                                                                                                                                                                                                                                                                                                                                                                                                                                                                                                                                                                                                                                                                                                                                                                                                                                                                                                                                                                                                                                                                                                                                                                                                                                                                                                                                                                                                                                                                                                                                                                                                                                                                                                                                                                                                                                                                                                                                                                                                                                                                                                                                                                                                                                                                                                                                                                                |             |         |             |               |                          |                                  |            |  |                   |        |       |        |       |        |                    |                                  |                         |   |     |   |     |      |                   |  |                    |     |      |    |     |       |                   |  |                       |   |             |   |            |               |                          |  |                      |     |    |    |    |      |                    |  |                                                                                                         |   |     |    |    |       |                   |  |                                              |   |    |   |     |      |                    |  |                    |   |    |   |    |       |                   |  |                    |   |     |   |     |      |                    |  |                   |    |      |    |     |       |                   |  |                  |   |    |   |    |      |                    |  |                          |  |             |  |            |              |                          |  |              |    |  |    |  |  |  |  |                                                                                                           |  |  |  |  |  |  |  |                                              |  |  |  |  |  |  |  |                         |  |  |  |  |  |  |  |                      |   |    |   |    |      |                   |  |                      |   |    |   |    |      |                    |  |                    |   |     |   |     |      |                    |  |                   |    |      |     |      |       |                   |  |                          |  |             |  |             |              |                          |  |              |    |  |     |  |  |  |  |                                                                                                         |  |  |  |  |  |  |  |                                              |  |  |  |  |  |  |  |                       |  |             |  |             |               |                          |  |              |     |  |     |  |  |  |  |                                                                                                            |  |  |  |  |  |  |  |                                              |  |  |  |  |  |  |  |                                                                                                |  |  |  |  |  |  |  |  |     |  |     |  |  |            |  |                   |        |       |        |       |        |                    |                                  |                      |   |    |   |     |      |                    |  |                    |   |     |   |     |      |                    |  |                   |     |      |    |     |       |                   |  |                       |  |             |  |            |               |                          |  |              |     |  |    |  |  |  |  |                                                                                                         |  |  |  |  |  |  |  |                                              |  |  |  |  |  |  |  |
| Albrecht et al, 2009                                                                                       | 1                                                                                                                                                                                                                                                                                                                                                                                                                                                                                                                                                                                                                                                                                                                                                                                                                                                                                                                                                                                                                                                                                                                                                                                                                                                                                                                                                                                                                                                                                                                                                                                                                                                                                                                                                                                                                                                                                                                                                                                                                                                                                                                                                                                                                                                                                                                                                                                                                                                                                                                                                                                                                                                                                                                                                                                                                                                                                                                                                                                                                                                                                                                                                                                                                                                                                                                                                                                                                                                                                                                                                                                                                                                                                                                                                                                                                                                                                                                                                                                                                                                                                                                                                                                                                                                                                                                                                                                                                                                                                                                                                                                                                                                                                                                                                                                                                                                                                                                                                                                                                                                                                                                                                              | 20          | 2       | 20          | 3.7%          | 0.47 [0.04, 5.69]        |                                  |            |  |                   |        |       |        |       |        |                    |                                  |                         |   |     |   |     |      |                   |  |                    |     |      |    |     |       |                   |  |                       |   |             |   |            |               |                          |  |                      |     |    |    |    |      |                    |  |                                                                                                         |   |     |    |    |       |                   |  |                                              |   |    |   |     |      |                    |  |                    |   |    |   |    |       |                   |  |                    |   |     |   |     |      |                    |  |                   |    |      |    |     |       |                   |  |                  |   |    |   |    |      |                    |  |                          |  |             |  |            |              |                          |  |              |    |  |    |  |  |  |  |                                                                                                           |  |  |  |  |  |  |  |                                              |  |  |  |  |  |  |  |                         |  |  |  |  |  |  |  |                      |   |    |   |    |      |                   |  |                      |   |    |   |    |      |                    |  |                    |   |     |   |     |      |                    |  |                   |    |      |     |      |       |                   |  |                          |  |             |  |             |              |                          |  |              |    |  |     |  |  |  |  |                                                                                                         |  |  |  |  |  |  |  |                                              |  |  |  |  |  |  |  |                       |  |             |  |             |               |                          |  |              |     |  |     |  |  |  |  |                                                                                                            |  |  |  |  |  |  |  |                                              |  |  |  |  |  |  |  |                                                                                                |  |  |  |  |  |  |  |  |     |  |     |  |  |            |  |                   |        |       |        |       |        |                    |                                  |                      |   |    |   |     |      |                    |  |                    |   |     |   |     |      |                    |  |                   |     |      |    |     |       |                   |  |                       |  |             |  |            |               |                          |  |              |     |  |    |  |  |  |  |                                                                                                         |  |  |  |  |  |  |  |                                              |  |  |  |  |  |  |  |
| McCarthy et al, 2010                                                                                       | 2                                                                                                                                                                                                                                                                                                                                                                                                                                                                                                                                                                                                                                                                                                                                                                                                                                                                                                                                                                                                                                                                                                                                                                                                                                                                                                                                                                                                                                                                                                                                                                                                                                                                                                                                                                                                                                                                                                                                                                                                                                                                                                                                                                                                                                                                                                                                                                                                                                                                                                                                                                                                                                                                                                                                                                                                                                                                                                                                                                                                                                                                                                                                                                                                                                                                                                                                                                                                                                                                                                                                                                                                                                                                                                                                                                                                                                                                                                                                                                                                                                                                                                                                                                                                                                                                                                                                                                                                                                                                                                                                                                                                                                                                                                                                                                                                                                                                                                                                                                                                                                                                                                                                                              | 91          | 0       | 50          | 2.5%          | 2.82 [0.13, 59.92]       |                                  |            |  |                   |        |       |        |       |        |                    |                                  |                         |   |     |   |     |      |                   |  |                    |     |      |    |     |       |                   |  |                       |   |             |   |            |               |                          |  |                      |     |    |    |    |      |                    |  |                                                                                                         |   |     |    |    |       |                   |  |                                              |   |    |   |     |      |                    |  |                    |   |    |   |    |       |                   |  |                    |   |     |   |     |      |                    |  |                   |    |      |    |     |       |                   |  |                  |   |    |   |    |      |                    |  |                          |  |             |  |            |              |                          |  |              |    |  |    |  |  |  |  |                                                                                                           |  |  |  |  |  |  |  |                                              |  |  |  |  |  |  |  |                         |  |  |  |  |  |  |  |                      |   |    |   |    |      |                   |  |                      |   |    |   |    |      |                    |  |                    |   |     |   |     |      |                    |  |                   |    |      |     |      |       |                   |  |                          |  |             |  |             |              |                          |  |              |    |  |     |  |  |  |  |                                                                                                         |  |  |  |  |  |  |  |                                              |  |  |  |  |  |  |  |                       |  |             |  |             |               |                          |  |              |     |  |     |  |  |  |  |                                                                                                            |  |  |  |  |  |  |  |                                              |  |  |  |  |  |  |  |                                                                                                |  |  |  |  |  |  |  |  |     |  |     |  |  |            |  |                   |        |       |        |       |        |                    |                                  |                      |   |    |   |     |      |                    |  |                    |   |     |   |     |      |                    |  |                   |     |      |    |     |       |                   |  |                       |  |             |  |            |               |                          |  |              |     |  |    |  |  |  |  |                                                                                                         |  |  |  |  |  |  |  |                                              |  |  |  |  |  |  |  |
| Stulak et al, 2014                                                                                         | 6                                                                                                                                                                                                                                                                                                                                                                                                                                                                                                                                                                                                                                                                                                                                                                                                                                                                                                                                                                                                                                                                                                                                                                                                                                                                                                                                                                                                                                                                                                                                                                                                                                                                                                                                                                                                                                                                                                                                                                                                                                                                                                                                                                                                                                                                                                                                                                                                                                                                                                                                                                                                                                                                                                                                                                                                                                                                                                                                                                                                                                                                                                                                                                                                                                                                                                                                                                                                                                                                                                                                                                                                                                                                                                                                                                                                                                                                                                                                                                                                                                                                                                                                                                                                                                                                                                                                                                                                                                                                                                                                                                                                                                                                                                                                                                                                                                                                                                                                                                                                                                                                                                                                                              | 514         | 1       | 269         | 4.8%          | 3.17 [0.38, 26.43]       |                                  |            |  |                   |        |       |        |       |        |                    |                                  |                         |   |     |   |     |      |                   |  |                    |     |      |    |     |       |                   |  |                       |   |             |   |            |               |                          |  |                      |     |    |    |    |      |                    |  |                                                                                                         |   |     |    |    |       |                   |  |                                              |   |    |   |     |      |                    |  |                    |   |    |   |    |       |                   |  |                    |   |     |   |     |      |                    |  |                   |    |      |    |     |       |                   |  |                  |   |    |   |    |      |                    |  |                          |  |             |  |            |              |                          |  |              |    |  |    |  |  |  |  |                                                                                                           |  |  |  |  |  |  |  |                                              |  |  |  |  |  |  |  |                         |  |  |  |  |  |  |  |                      |   |    |   |    |      |                   |  |                      |   |    |   |    |      |                    |  |                    |   |     |   |     |      |                    |  |                   |    |      |     |      |       |                   |  |                          |  |             |  |             |              |                          |  |              |    |  |     |  |  |  |  |                                                                                                         |  |  |  |  |  |  |  |                                              |  |  |  |  |  |  |  |                       |  |             |  |             |               |                          |  |              |     |  |     |  |  |  |  |                                                                                                            |  |  |  |  |  |  |  |                                              |  |  |  |  |  |  |  |                                                                                                |  |  |  |  |  |  |  |  |     |  |     |  |  |            |  |                   |        |       |        |       |        |                    |                                  |                      |   |    |   |     |      |                    |  |                    |   |     |   |     |      |                    |  |                   |     |      |    |     |       |                   |  |                       |  |             |  |            |               |                          |  |              |     |  |    |  |  |  |  |                                                                                                         |  |  |  |  |  |  |  |                                              |  |  |  |  |  |  |  |
| Takai et al, 2017                                                                                          | 68                                                                                                                                                                                                                                                                                                                                                                                                                                                                                                                                                                                                                                                                                                                                                                                                                                                                                                                                                                                                                                                                                                                                                                                                                                                                                                                                                                                                                                                                                                                                                                                                                                                                                                                                                                                                                                                                                                                                                                                                                                                                                                                                                                                                                                                                                                                                                                                                                                                                                                                                                                                                                                                                                                                                                                                                                                                                                                                                                                                                                                                                                                                                                                                                                                                                                                                                                                                                                                                                                                                                                                                                                                                                                                                                                                                                                                                                                                                                                                                                                                                                                                                                                                                                                                                                                                                                                                                                                                                                                                                                                                                                                                                                                                                                                                                                                                                                                                                                                                                                                                                                                                                                                             | 1339        | 108     | 1797        | 24.6%         | 0.84 [0.61, 1.14]        |                                  |            |  |                   |        |       |        |       |        |                    |                                  |                         |   |     |   |     |      |                   |  |                    |     |      |    |     |       |                   |  |                       |   |             |   |            |               |                          |  |                      |     |    |    |    |      |                    |  |                                                                                                         |   |     |    |    |       |                   |  |                                              |   |    |   |     |      |                    |  |                    |   |    |   |    |       |                   |  |                    |   |     |   |     |      |                    |  |                   |    |      |    |     |       |                   |  |                  |   |    |   |    |      |                    |  |                          |  |             |  |            |              |                          |  |              |    |  |    |  |  |  |  |                                                                                                           |  |  |  |  |  |  |  |                                              |  |  |  |  |  |  |  |                         |  |  |  |  |  |  |  |                      |   |    |   |    |      |                   |  |                      |   |    |   |    |      |                    |  |                    |   |     |   |     |      |                    |  |                   |    |      |     |      |       |                   |  |                          |  |             |  |             |              |                          |  |              |    |  |     |  |  |  |  |                                                                                                         |  |  |  |  |  |  |  |                                              |  |  |  |  |  |  |  |                       |  |             |  |             |               |                          |  |              |     |  |     |  |  |  |  |                                                                                                            |  |  |  |  |  |  |  |                                              |  |  |  |  |  |  |  |                                                                                                |  |  |  |  |  |  |  |  |     |  |     |  |  |            |  |                   |        |       |        |       |        |                    |                                  |                      |   |    |   |     |      |                    |  |                    |   |     |   |     |      |                    |  |                   |     |      |    |     |       |                   |  |                       |  |             |  |            |               |                          |  |              |     |  |    |  |  |  |  |                                                                                                         |  |  |  |  |  |  |  |                                              |  |  |  |  |  |  |  |
| <b>Subtotal (95% CI)</b>                                                                                   |                                                                                                                                                                                                                                                                                                                                                                                                                                                                                                                                                                                                                                                                                                                                                                                                                                                                                                                                                                                                                                                                                                                                                                                                                                                                                                                                                                                                                                                                                                                                                                                                                                                                                                                                                                                                                                                                                                                                                                                                                                                                                                                                                                                                                                                                                                                                                                                                                                                                                                                                                                                                                                                                                                                                                                                                                                                                                                                                                                                                                                                                                                                                                                                                                                                                                                                                                                                                                                                                                                                                                                                                                                                                                                                                                                                                                                                                                                                                                                                                                                                                                                                                                                                                                                                                                                                                                                                                                                                                                                                                                                                                                                                                                                                                                                                                                                                                                                                                                                                                                                                                                                                                                                | <b>1964</b> |         | <b>2136</b> | <b>35.5%</b>  | <b>0.86 [0.64, 1.17]</b> |                                  |            |  |                   |        |       |        |       |        |                    |                                  |                         |   |     |   |     |      |                   |  |                    |     |      |    |     |       |                   |  |                       |   |             |   |            |               |                          |  |                      |     |    |    |    |      |                    |  |                                                                                                         |   |     |    |    |       |                   |  |                                              |   |    |   |     |      |                    |  |                    |   |    |   |    |       |                   |  |                    |   |     |   |     |      |                    |  |                   |    |      |    |     |       |                   |  |                  |   |    |   |    |      |                    |  |                          |  |             |  |            |              |                          |  |              |    |  |    |  |  |  |  |                                                                                                           |  |  |  |  |  |  |  |                                              |  |  |  |  |  |  |  |                         |  |  |  |  |  |  |  |                      |   |    |   |    |      |                   |  |                      |   |    |   |    |      |                    |  |                    |   |     |   |     |      |                    |  |                   |    |      |     |      |       |                   |  |                          |  |             |  |             |              |                          |  |              |    |  |     |  |  |  |  |                                                                                                         |  |  |  |  |  |  |  |                                              |  |  |  |  |  |  |  |                       |  |             |  |             |               |                          |  |              |     |  |     |  |  |  |  |                                                                                                            |  |  |  |  |  |  |  |                                              |  |  |  |  |  |  |  |                                                                                                |  |  |  |  |  |  |  |  |     |  |     |  |  |            |  |                   |        |       |        |       |        |                    |                                  |                      |   |    |   |     |      |                    |  |                    |   |     |   |     |      |                    |  |                   |     |      |    |     |       |                   |  |                       |  |             |  |            |               |                          |  |              |     |  |    |  |  |  |  |                                                                                                         |  |  |  |  |  |  |  |                                              |  |  |  |  |  |  |  |
| Total events                                                                                               | 77                                                                                                                                                                                                                                                                                                                                                                                                                                                                                                                                                                                                                                                                                                                                                                                                                                                                                                                                                                                                                                                                                                                                                                                                                                                                                                                                                                                                                                                                                                                                                                                                                                                                                                                                                                                                                                                                                                                                                                                                                                                                                                                                                                                                                                                                                                                                                                                                                                                                                                                                                                                                                                                                                                                                                                                                                                                                                                                                                                                                                                                                                                                                                                                                                                                                                                                                                                                                                                                                                                                                                                                                                                                                                                                                                                                                                                                                                                                                                                                                                                                                                                                                                                                                                                                                                                                                                                                                                                                                                                                                                                                                                                                                                                                                                                                                                                                                                                                                                                                                                                                                                                                                                             |             | 111     |             |               |                          |                                  |            |  |                   |        |       |        |       |        |                    |                                  |                         |   |     |   |     |      |                   |  |                    |     |      |    |     |       |                   |  |                       |   |             |   |            |               |                          |  |                      |     |    |    |    |      |                    |  |                                                                                                         |   |     |    |    |       |                   |  |                                              |   |    |   |     |      |                    |  |                    |   |    |   |    |       |                   |  |                    |   |     |   |     |      |                    |  |                   |    |      |    |     |       |                   |  |                  |   |    |   |    |      |                    |  |                          |  |             |  |            |              |                          |  |              |    |  |    |  |  |  |  |                                                                                                           |  |  |  |  |  |  |  |                                              |  |  |  |  |  |  |  |                         |  |  |  |  |  |  |  |                      |   |    |   |    |      |                   |  |                      |   |    |   |    |      |                    |  |                    |   |     |   |     |      |                    |  |                   |    |      |     |      |       |                   |  |                          |  |             |  |             |              |                          |  |              |    |  |     |  |  |  |  |                                                                                                         |  |  |  |  |  |  |  |                                              |  |  |  |  |  |  |  |                       |  |             |  |             |               |                          |  |              |     |  |     |  |  |  |  |                                                                                                            |  |  |  |  |  |  |  |                                              |  |  |  |  |  |  |  |                                                                                                |  |  |  |  |  |  |  |  |     |  |     |  |  |            |  |                   |        |       |        |       |        |                    |                                  |                      |   |    |   |     |      |                    |  |                    |   |     |   |     |      |                    |  |                   |     |      |    |     |       |                   |  |                       |  |             |  |            |               |                          |  |              |     |  |    |  |  |  |  |                                                                                                         |  |  |  |  |  |  |  |                                              |  |  |  |  |  |  |  |
| Heterogeneity: Tau <sup>2</sup> = 0.00; Chi <sup>2</sup> = 2.28, df = 3 (P = 0.52); I <sup>2</sup> = 0%    |                                                                                                                                                                                                                                                                                                                                                                                                                                                                                                                                                                                                                                                                                                                                                                                                                                                                                                                                                                                                                                                                                                                                                                                                                                                                                                                                                                                                                                                                                                                                                                                                                                                                                                                                                                                                                                                                                                                                                                                                                                                                                                                                                                                                                                                                                                                                                                                                                                                                                                                                                                                                                                                                                                                                                                                                                                                                                                                                                                                                                                                                                                                                                                                                                                                                                                                                                                                                                                                                                                                                                                                                                                                                                                                                                                                                                                                                                                                                                                                                                                                                                                                                                                                                                                                                                                                                                                                                                                                                                                                                                                                                                                                                                                                                                                                                                                                                                                                                                                                                                                                                                                                                                                |             |         |             |               |                          |                                  |            |  |                   |        |       |        |       |        |                    |                                  |                         |   |     |   |     |      |                   |  |                    |     |      |    |     |       |                   |  |                       |   |             |   |            |               |                          |  |                      |     |    |    |    |      |                    |  |                                                                                                         |   |     |    |    |       |                   |  |                                              |   |    |   |     |      |                    |  |                    |   |    |   |    |       |                   |  |                    |   |     |   |     |      |                    |  |                   |    |      |    |     |       |                   |  |                  |   |    |   |    |      |                    |  |                          |  |             |  |            |              |                          |  |              |    |  |    |  |  |  |  |                                                                                                           |  |  |  |  |  |  |  |                                              |  |  |  |  |  |  |  |                         |  |  |  |  |  |  |  |                      |   |    |   |    |      |                   |  |                      |   |    |   |    |      |                    |  |                    |   |     |   |     |      |                    |  |                   |    |      |     |      |       |                   |  |                          |  |             |  |             |              |                          |  |              |    |  |     |  |  |  |  |                                                                                                         |  |  |  |  |  |  |  |                                              |  |  |  |  |  |  |  |                       |  |             |  |             |               |                          |  |              |     |  |     |  |  |  |  |                                                                                                            |  |  |  |  |  |  |  |                                              |  |  |  |  |  |  |  |                                                                                                |  |  |  |  |  |  |  |  |     |  |     |  |  |            |  |                   |        |       |        |       |        |                    |                                  |                      |   |    |   |     |      |                    |  |                    |   |     |   |     |      |                    |  |                   |     |      |    |     |       |                   |  |                       |  |             |  |            |               |                          |  |              |     |  |    |  |  |  |  |                                                                                                         |  |  |  |  |  |  |  |                                              |  |  |  |  |  |  |  |
| Test for overall effect: Z = 0.95 (P = 0.34)                                                               |                                                                                                                                                                                                                                                                                                                                                                                                                                                                                                                                                                                                                                                                                                                                                                                                                                                                                                                                                                                                                                                                                                                                                                                                                                                                                                                                                                                                                                                                                                                                                                                                                                                                                                                                                                                                                                                                                                                                                                                                                                                                                                                                                                                                                                                                                                                                                                                                                                                                                                                                                                                                                                                                                                                                                                                                                                                                                                                                                                                                                                                                                                                                                                                                                                                                                                                                                                                                                                                                                                                                                                                                                                                                                                                                                                                                                                                                                                                                                                                                                                                                                                                                                                                                                                                                                                                                                                                                                                                                                                                                                                                                                                                                                                                                                                                                                                                                                                                                                                                                                                                                                                                                                                |             |         |             |               |                          |                                  |            |  |                   |        |       |        |       |        |                    |                                  |                         |   |     |   |     |      |                   |  |                    |     |      |    |     |       |                   |  |                       |   |             |   |            |               |                          |  |                      |     |    |    |    |      |                    |  |                                                                                                         |   |     |    |    |       |                   |  |                                              |   |    |   |     |      |                    |  |                    |   |    |   |    |       |                   |  |                    |   |     |   |     |      |                    |  |                   |    |      |    |     |       |                   |  |                  |   |    |   |    |      |                    |  |                          |  |             |  |            |              |                          |  |              |    |  |    |  |  |  |  |                                                                                                           |  |  |  |  |  |  |  |                                              |  |  |  |  |  |  |  |                         |  |  |  |  |  |  |  |                      |   |    |   |    |      |                   |  |                      |   |    |   |    |      |                    |  |                    |   |     |   |     |      |                    |  |                   |    |      |     |      |       |                   |  |                          |  |             |  |             |              |                          |  |              |    |  |     |  |  |  |  |                                                                                                         |  |  |  |  |  |  |  |                                              |  |  |  |  |  |  |  |                       |  |             |  |             |               |                          |  |              |     |  |     |  |  |  |  |                                                                                                            |  |  |  |  |  |  |  |                                              |  |  |  |  |  |  |  |                                                                                                |  |  |  |  |  |  |  |  |     |  |     |  |  |            |  |                   |        |       |        |       |        |                    |                                  |                      |   |    |   |     |      |                    |  |                    |   |     |   |     |      |                    |  |                   |     |      |    |     |       |                   |  |                       |  |             |  |            |               |                          |  |              |     |  |    |  |  |  |  |                                                                                                         |  |  |  |  |  |  |  |                                              |  |  |  |  |  |  |  |
| <b>Total (95% CI)</b>                                                                                      |                                                                                                                                                                                                                                                                                                                                                                                                                                                                                                                                                                                                                                                                                                                                                                                                                                                                                                                                                                                                                                                                                                                                                                                                                                                                                                                                                                                                                                                                                                                                                                                                                                                                                                                                                                                                                                                                                                                                                                                                                                                                                                                                                                                                                                                                                                                                                                                                                                                                                                                                                                                                                                                                                                                                                                                                                                                                                                                                                                                                                                                                                                                                                                                                                                                                                                                                                                                                                                                                                                                                                                                                                                                                                                                                                                                                                                                                                                                                                                                                                                                                                                                                                                                                                                                                                                                                                                                                                                                                                                                                                                                                                                                                                                                                                                                                                                                                                                                                                                                                                                                                                                                                                                | <b>4437</b> |         | <b>3063</b> | <b>100.0%</b> | <b>0.86 [0.52, 1.44]</b> |                                  |            |  |                   |        |       |        |       |        |                    |                                  |                         |   |     |   |     |      |                   |  |                    |     |      |    |     |       |                   |  |                       |   |             |   |            |               |                          |  |                      |     |    |    |    |      |                    |  |                                                                                                         |   |     |    |    |       |                   |  |                                              |   |    |   |     |      |                    |  |                    |   |    |   |    |       |                   |  |                    |   |     |   |     |      |                    |  |                   |    |      |    |     |       |                   |  |                  |   |    |   |    |      |                    |  |                          |  |             |  |            |              |                          |  |              |    |  |    |  |  |  |  |                                                                                                           |  |  |  |  |  |  |  |                                              |  |  |  |  |  |  |  |                         |  |  |  |  |  |  |  |                      |   |    |   |    |      |                   |  |                      |   |    |   |    |      |                    |  |                    |   |     |   |     |      |                    |  |                   |    |      |     |      |       |                   |  |                          |  |             |  |             |              |                          |  |              |    |  |     |  |  |  |  |                                                                                                         |  |  |  |  |  |  |  |                                              |  |  |  |  |  |  |  |                       |  |             |  |             |               |                          |  |              |     |  |     |  |  |  |  |                                                                                                            |  |  |  |  |  |  |  |                                              |  |  |  |  |  |  |  |                                                                                                |  |  |  |  |  |  |  |  |     |  |     |  |  |            |  |                   |        |       |        |       |        |                    |                                  |                      |   |    |   |     |      |                    |  |                    |   |     |   |     |      |                    |  |                   |     |      |    |     |       |                   |  |                       |  |             |  |            |               |                          |  |              |     |  |    |  |  |  |  |                                                                                                         |  |  |  |  |  |  |  |                                              |  |  |  |  |  |  |  |
| Total events                                                                                               | 174                                                                                                                                                                                                                                                                                                                                                                                                                                                                                                                                                                                                                                                                                                                                                                                                                                                                                                                                                                                                                                                                                                                                                                                                                                                                                                                                                                                                                                                                                                                                                                                                                                                                                                                                                                                                                                                                                                                                                                                                                                                                                                                                                                                                                                                                                                                                                                                                                                                                                                                                                                                                                                                                                                                                                                                                                                                                                                                                                                                                                                                                                                                                                                                                                                                                                                                                                                                                                                                                                                                                                                                                                                                                                                                                                                                                                                                                                                                                                                                                                                                                                                                                                                                                                                                                                                                                                                                                                                                                                                                                                                                                                                                                                                                                                                                                                                                                                                                                                                                                                                                                                                                                                            |             | 155     |             |               |                          |                                  |            |  |                   |        |       |        |       |        |                    |                                  |                         |   |     |   |     |      |                   |  |                    |     |      |    |     |       |                   |  |                       |   |             |   |            |               |                          |  |                      |     |    |    |    |      |                    |  |                                                                                                         |   |     |    |    |       |                   |  |                                              |   |    |   |     |      |                    |  |                    |   |    |   |    |       |                   |  |                    |   |     |   |     |      |                    |  |                   |    |      |    |     |       |                   |  |                  |   |    |   |    |      |                    |  |                          |  |             |  |            |              |                          |  |              |    |  |    |  |  |  |  |                                                                                                           |  |  |  |  |  |  |  |                                              |  |  |  |  |  |  |  |                         |  |  |  |  |  |  |  |                      |   |    |   |    |      |                   |  |                      |   |    |   |    |      |                    |  |                    |   |     |   |     |      |                    |  |                   |    |      |     |      |       |                   |  |                          |  |             |  |             |              |                          |  |              |    |  |     |  |  |  |  |                                                                                                         |  |  |  |  |  |  |  |                                              |  |  |  |  |  |  |  |                       |  |             |  |             |               |                          |  |              |     |  |     |  |  |  |  |                                                                                                            |  |  |  |  |  |  |  |                                              |  |  |  |  |  |  |  |                                                                                                |  |  |  |  |  |  |  |  |     |  |     |  |  |            |  |                   |        |       |        |       |        |                    |                                  |                      |   |    |   |     |      |                    |  |                    |   |     |   |     |      |                    |  |                   |     |      |    |     |       |                   |  |                       |  |             |  |            |               |                          |  |              |     |  |    |  |  |  |  |                                                                                                         |  |  |  |  |  |  |  |                                              |  |  |  |  |  |  |  |
| Heterogeneity: Tau <sup>2</sup> = 0.25; Chi <sup>2</sup> = 20.94, df = 12 (P = 0.05); I <sup>2</sup> = 43% |                                                                                                                                                                                                                                                                                                                                                                                                                                                                                                                                                                                                                                                                                                                                                                                                                                                                                                                                                                                                                                                                                                                                                                                                                                                                                                                                                                                                                                                                                                                                                                                                                                                                                                                                                                                                                                                                                                                                                                                                                                                                                                                                                                                                                                                                                                                                                                                                                                                                                                                                                                                                                                                                                                                                                                                                                                                                                                                                                                                                                                                                                                                                                                                                                                                                                                                                                                                                                                                                                                                                                                                                                                                                                                                                                                                                                                                                                                                                                                                                                                                                                                                                                                                                                                                                                                                                                                                                                                                                                                                                                                                                                                                                                                                                                                                                                                                                                                                                                                                                                                                                                                                                                                |             |         |             |               |                          |                                  |            |  |                   |        |       |        |       |        |                    |                                  |                         |   |     |   |     |      |                   |  |                    |     |      |    |     |       |                   |  |                       |   |             |   |            |               |                          |  |                      |     |    |    |    |      |                    |  |                                                                                                         |   |     |    |    |       |                   |  |                                              |   |    |   |     |      |                    |  |                    |   |    |   |    |       |                   |  |                    |   |     |   |     |      |                    |  |                   |    |      |    |     |       |                   |  |                  |   |    |   |    |      |                    |  |                          |  |             |  |            |              |                          |  |              |    |  |    |  |  |  |  |                                                                                                           |  |  |  |  |  |  |  |                                              |  |  |  |  |  |  |  |                         |  |  |  |  |  |  |  |                      |   |    |   |    |      |                   |  |                      |   |    |   |    |      |                    |  |                    |   |     |   |     |      |                    |  |                   |    |      |     |      |       |                   |  |                          |  |             |  |             |              |                          |  |              |    |  |     |  |  |  |  |                                                                                                         |  |  |  |  |  |  |  |                                              |  |  |  |  |  |  |  |                       |  |             |  |             |               |                          |  |              |     |  |     |  |  |  |  |                                                                                                            |  |  |  |  |  |  |  |                                              |  |  |  |  |  |  |  |                                                                                                |  |  |  |  |  |  |  |  |     |  |     |  |  |            |  |                   |        |       |        |       |        |                    |                                  |                      |   |    |   |     |      |                    |  |                    |   |     |   |     |      |                    |  |                   |     |      |    |     |       |                   |  |                       |  |             |  |            |               |                          |  |              |     |  |    |  |  |  |  |                                                                                                         |  |  |  |  |  |  |  |                                              |  |  |  |  |  |  |  |
| Test for overall effect: Z = 0.57 (P = 0.57)                                                               |                                                                                                                                                                                                                                                                                                                                                                                                                                                                                                                                                                                                                                                                                                                                                                                                                                                                                                                                                                                                                                                                                                                                                                                                                                                                                                                                                                                                                                                                                                                                                                                                                                                                                                                                                                                                                                                                                                                                                                                                                                                                                                                                                                                                                                                                                                                                                                                                                                                                                                                                                                                                                                                                                                                                                                                                                                                                                                                                                                                                                                                                                                                                                                                                                                                                                                                                                                                                                                                                                                                                                                                                                                                                                                                                                                                                                                                                                                                                                                                                                                                                                                                                                                                                                                                                                                                                                                                                                                                                                                                                                                                                                                                                                                                                                                                                                                                                                                                                                                                                                                                                                                                                                                |             |         |             |               |                          |                                  |            |  |                   |        |       |        |       |        |                    |                                  |                         |   |     |   |     |      |                   |  |                    |     |      |    |     |       |                   |  |                       |   |             |   |            |               |                          |  |                      |     |    |    |    |      |                    |  |                                                                                                         |   |     |    |    |       |                   |  |                                              |   |    |   |     |      |                    |  |                    |   |    |   |    |       |                   |  |                    |   |     |   |     |      |                    |  |                   |    |      |    |     |       |                   |  |                  |   |    |   |    |      |                    |  |                          |  |             |  |            |              |                          |  |              |    |  |    |  |  |  |  |                                                                                                           |  |  |  |  |  |  |  |                                              |  |  |  |  |  |  |  |                         |  |  |  |  |  |  |  |                      |   |    |   |    |      |                   |  |                      |   |    |   |    |      |                    |  |                    |   |     |   |     |      |                    |  |                   |    |      |     |      |       |                   |  |                          |  |             |  |             |              |                          |  |              |    |  |     |  |  |  |  |                                                                                                         |  |  |  |  |  |  |  |                                              |  |  |  |  |  |  |  |                       |  |             |  |             |               |                          |  |              |     |  |     |  |  |  |  |                                                                                                            |  |  |  |  |  |  |  |                                              |  |  |  |  |  |  |  |                                                                                                |  |  |  |  |  |  |  |  |     |  |     |  |  |            |  |                   |        |       |        |       |        |                    |                                  |                      |   |    |   |     |      |                    |  |                    |   |     |   |     |      |                    |  |                   |     |      |    |     |       |                   |  |                       |  |             |  |            |               |                          |  |              |     |  |    |  |  |  |  |                                                                                                         |  |  |  |  |  |  |  |                                              |  |  |  |  |  |  |  |
| Test for subgroup differences: Chi <sup>2</sup> = 0.00, df = 1 (P = 0.95), I <sup>2</sup> = 0%             |                                                                                                                                                                                                                                                                                                                                                                                                                                                                                                                                                                                                                                                                                                                                                                                                                                                                                                                                                                                                                                                                                                                                                                                                                                                                                                                                                                                                                                                                                                                                                                                                                                                                                                                                                                                                                                                                                                                                                                                                                                                                                                                                                                                                                                                                                                                                                                                                                                                                                                                                                                                                                                                                                                                                                                                                                                                                                                                                                                                                                                                                                                                                                                                                                                                                                                                                                                                                                                                                                                                                                                                                                                                                                                                                                                                                                                                                                                                                                                                                                                                                                                                                                                                                                                                                                                                                                                                                                                                                                                                                                                                                                                                                                                                                                                                                                                                                                                                                                                                                                                                                                                                                                                |             |         |             |               |                          |                                  |            |  |                   |        |       |        |       |        |                    |                                  |                         |   |     |   |     |      |                   |  |                    |     |      |    |     |       |                   |  |                       |   |             |   |            |               |                          |  |                      |     |    |    |    |      |                    |  |                                                                                                         |   |     |    |    |       |                   |  |                                              |   |    |   |     |      |                    |  |                    |   |    |   |    |       |                   |  |                    |   |     |   |     |      |                    |  |                   |    |      |    |     |       |                   |  |                  |   |    |   |    |      |                    |  |                          |  |             |  |            |              |                          |  |              |    |  |    |  |  |  |  |                                                                                                           |  |  |  |  |  |  |  |                                              |  |  |  |  |  |  |  |                         |  |  |  |  |  |  |  |                      |   |    |   |    |      |                   |  |                      |   |    |   |    |      |                    |  |                    |   |     |   |     |      |                    |  |                   |    |      |     |      |       |                   |  |                          |  |             |  |             |              |                          |  |              |    |  |     |  |  |  |  |                                                                                                         |  |  |  |  |  |  |  |                                              |  |  |  |  |  |  |  |                       |  |             |  |             |               |                          |  |              |     |  |     |  |  |  |  |                                                                                                            |  |  |  |  |  |  |  |                                              |  |  |  |  |  |  |  |                                                                                                |  |  |  |  |  |  |  |  |     |  |     |  |  |            |  |                   |        |       |        |       |        |                    |                                  |                      |   |    |   |     |      |                    |  |                    |   |     |   |     |      |                    |  |                   |     |      |    |     |       |                   |  |                       |  |             |  |            |               |                          |  |              |     |  |    |  |  |  |  |                                                                                                         |  |  |  |  |  |  |  |                                              |  |  |  |  |  |  |  |
|                                                                                                            | PVI                                                                                                                                                                                                                                                                                                                                                                                                                                                                                                                                                                                                                                                                                                                                                                                                                                                                                                                                                                                                                                                                                                                                                                                                                                                                                                                                                                                                                                                                                                                                                                                                                                                                                                                                                                                                                                                                                                                                                                                                                                                                                                                                                                                                                                                                                                                                                                                                                                                                                                                                                                                                                                                                                                                                                                                                                                                                                                                                                                                                                                                                                                                                                                                                                                                                                                                                                                                                                                                                                                                                                                                                                                                                                                                                                                                                                                                                                                                                                                                                                                                                                                                                                                                                                                                                                                                                                                                                                                                                                                                                                                                                                                                                                                                                                                                                                                                                                                                                                                                                                                                                                                                                                            |             | LAA     |             |               | Odds Ratio               |                                  |            |  |                   |        |       |        |       |        |                    |                                  |                         |   |     |   |     |      |                   |  |                    |     |      |    |     |       |                   |  |                       |   |             |   |            |               |                          |  |                      |     |    |    |    |      |                    |  |                                                                                                         |   |     |    |    |       |                   |  |                                              |   |    |   |     |      |                    |  |                    |   |    |   |    |       |                   |  |                    |   |     |   |     |      |                    |  |                   |    |      |    |     |       |                   |  |                  |   |    |   |    |      |                    |  |                          |  |             |  |            |              |                          |  |              |    |  |    |  |  |  |  |                                                                                                           |  |  |  |  |  |  |  |                                              |  |  |  |  |  |  |  |                         |  |  |  |  |  |  |  |                      |   |    |   |    |      |                   |  |                      |   |    |   |    |      |                    |  |                    |   |     |   |     |      |                    |  |                   |    |      |     |      |       |                   |  |                          |  |             |  |             |              |                          |  |              |    |  |     |  |  |  |  |                                                                                                         |  |  |  |  |  |  |  |                                              |  |  |  |  |  |  |  |                       |  |             |  |             |               |                          |  |              |     |  |     |  |  |  |  |                                                                                                            |  |  |  |  |  |  |  |                                              |  |  |  |  |  |  |  |                                                                                                |  |  |  |  |  |  |  |  |     |  |     |  |  |            |  |                   |        |       |        |       |        |                    |                                  |                      |   |    |   |     |      |                    |  |                    |   |     |   |     |      |                    |  |                   |     |      |    |     |       |                   |  |                       |  |             |  |            |               |                          |  |              |     |  |    |  |  |  |  |                                                                                                         |  |  |  |  |  |  |  |                                              |  |  |  |  |  |  |  |
| Study or Subgroup                                                                                          | Events                                                                                                                                                                                                                                                                                                                                                                                                                                                                                                                                                                                                                                                                                                                                                                                                                                                                                                                                                                                                                                                                                                                                                                                                                                                                                                                                                                                                                                                                                                                                                                                                                                                                                                                                                                                                                                                                                                                                                                                                                                                                                                                                                                                                                                                                                                                                                                                                                                                                                                                                                                                                                                                                                                                                                                                                                                                                                                                                                                                                                                                                                                                                                                                                                                                                                                                                                                                                                                                                                                                                                                                                                                                                                                                                                                                                                                                                                                                                                                                                                                                                                                                                                                                                                                                                                                                                                                                                                                                                                                                                                                                                                                                                                                                                                                                                                                                                                                                                                                                                                                                                                                                                                         | Total       | Events  | Total       | Weight        | IV, Random, 95% CI       | Odds Ratio<br>IV, Random, 95% CI |            |  |                   |        |       |        |       |        |                    |                                  |                         |   |     |   |     |      |                   |  |                    |     |      |    |     |       |                   |  |                       |   |             |   |            |               |                          |  |                      |     |    |    |    |      |                    |  |                                                                                                         |   |     |    |    |       |                   |  |                                              |   |    |   |     |      |                    |  |                    |   |    |   |    |       |                   |  |                    |   |     |   |     |      |                    |  |                   |    |      |    |     |       |                   |  |                  |   |    |   |    |      |                    |  |                          |  |             |  |            |              |                          |  |              |    |  |    |  |  |  |  |                                                                                                           |  |  |  |  |  |  |  |                                              |  |  |  |  |  |  |  |                         |  |  |  |  |  |  |  |                      |   |    |   |    |      |                   |  |                      |   |    |   |    |      |                    |  |                    |   |     |   |     |      |                    |  |                   |    |      |     |      |       |                   |  |                          |  |             |  |             |              |                          |  |              |    |  |     |  |  |  |  |                                                                                                         |  |  |  |  |  |  |  |                                              |  |  |  |  |  |  |  |                       |  |             |  |             |               |                          |  |              |     |  |     |  |  |  |  |                                                                                                            |  |  |  |  |  |  |  |                                              |  |  |  |  |  |  |  |                                                                                                |  |  |  |  |  |  |  |  |     |  |     |  |  |            |  |                   |        |       |        |       |        |                    |                                  |                      |   |    |   |     |      |                    |  |                    |   |     |   |     |      |                    |  |                   |     |      |    |     |       |                   |  |                       |  |             |  |            |               |                          |  |              |     |  |    |  |  |  |  |                                                                                                         |  |  |  |  |  |  |  |                                              |  |  |  |  |  |  |  |
| McCarthy et al, 2010                                                                                       | 0                                                                                                                                                                                                                                                                                                                                                                                                                                                                                                                                                                                                                                                                                                                                                                                                                                                                                                                                                                                                                                                                                                                                                                                                                                                                                                                                                                                                                                                                                                                                                                                                                                                                                                                                                                                                                                                                                                                                                                                                                                                                                                                                                                                                                                                                                                                                                                                                                                                                                                                                                                                                                                                                                                                                                                                                                                                                                                                                                                                                                                                                                                                                                                                                                                                                                                                                                                                                                                                                                                                                                                                                                                                                                                                                                                                                                                                                                                                                                                                                                                                                                                                                                                                                                                                                                                                                                                                                                                                                                                                                                                                                                                                                                                                                                                                                                                                                                                                                                                                                                                                                                                                                                              | 50          | 1       | 175         | 2.7%          | 1.15 [0.05, 28.71]       |                                  |            |  |                   |        |       |        |       |        |                    |                                  |                         |   |     |   |     |      |                   |  |                    |     |      |    |     |       |                   |  |                       |   |             |   |            |               |                          |  |                      |     |    |    |    |      |                    |  |                                                                                                         |   |     |    |    |       |                   |  |                                              |   |    |   |     |      |                    |  |                    |   |    |   |    |       |                   |  |                    |   |     |   |     |      |                    |  |                   |    |      |    |     |       |                   |  |                  |   |    |   |    |      |                    |  |                          |  |             |  |            |              |                          |  |              |    |  |    |  |  |  |  |                                                                                                           |  |  |  |  |  |  |  |                                              |  |  |  |  |  |  |  |                         |  |  |  |  |  |  |  |                      |   |    |   |    |      |                   |  |                      |   |    |   |    |      |                    |  |                    |   |     |   |     |      |                    |  |                   |    |      |     |      |       |                   |  |                          |  |             |  |             |              |                          |  |              |    |  |     |  |  |  |  |                                                                                                         |  |  |  |  |  |  |  |                                              |  |  |  |  |  |  |  |                       |  |             |  |             |               |                          |  |              |     |  |     |  |  |  |  |                                                                                                            |  |  |  |  |  |  |  |                                              |  |  |  |  |  |  |  |                                                                                                |  |  |  |  |  |  |  |  |     |  |     |  |  |            |  |                   |        |       |        |       |        |                    |                                  |                      |   |    |   |     |      |                    |  |                    |   |     |   |     |      |                    |  |                   |     |      |    |     |       |                   |  |                       |  |             |  |            |               |                          |  |              |     |  |    |  |  |  |  |                                                                                                         |  |  |  |  |  |  |  |                                              |  |  |  |  |  |  |  |
| Stulak et al, 2014                                                                                         | 1                                                                                                                                                                                                                                                                                                                                                                                                                                                                                                                                                                                                                                                                                                                                                                                                                                                                                                                                                                                                                                                                                                                                                                                                                                                                                                                                                                                                                                                                                                                                                                                                                                                                                                                                                                                                                                                                                                                                                                                                                                                                                                                                                                                                                                                                                                                                                                                                                                                                                                                                                                                                                                                                                                                                                                                                                                                                                                                                                                                                                                                                                                                                                                                                                                                                                                                                                                                                                                                                                                                                                                                                                                                                                                                                                                                                                                                                                                                                                                                                                                                                                                                                                                                                                                                                                                                                                                                                                                                                                                                                                                                                                                                                                                                                                                                                                                                                                                                                                                                                                                                                                                                                                              | 269         | 0       | 110         | 2.7%          | 1.23 [0.05, 30.54]       |                                  |            |  |                   |        |       |        |       |        |                    |                                  |                         |   |     |   |     |      |                   |  |                    |     |      |    |     |       |                   |  |                       |   |             |   |            |               |                          |  |                      |     |    |    |    |      |                    |  |                                                                                                         |   |     |    |    |       |                   |  |                                              |   |    |   |     |      |                    |  |                    |   |    |   |    |       |                   |  |                    |   |     |   |     |      |                    |  |                   |    |      |    |     |       |                   |  |                  |   |    |   |    |      |                    |  |                          |  |             |  |            |              |                          |  |              |    |  |    |  |  |  |  |                                                                                                           |  |  |  |  |  |  |  |                                              |  |  |  |  |  |  |  |                         |  |  |  |  |  |  |  |                      |   |    |   |    |      |                   |  |                      |   |    |   |    |      |                    |  |                    |   |     |   |     |      |                    |  |                   |    |      |     |      |       |                   |  |                          |  |             |  |             |              |                          |  |              |    |  |     |  |  |  |  |                                                                                                         |  |  |  |  |  |  |  |                                              |  |  |  |  |  |  |  |                       |  |             |  |             |               |                          |  |              |     |  |     |  |  |  |  |                                                                                                            |  |  |  |  |  |  |  |                                              |  |  |  |  |  |  |  |                                                                                                |  |  |  |  |  |  |  |  |     |  |     |  |  |            |  |                   |        |       |        |       |        |                    |                                  |                      |   |    |   |     |      |                    |  |                    |   |     |   |     |      |                    |  |                   |     |      |    |     |       |                   |  |                       |  |             |  |            |               |                          |  |              |     |  |    |  |  |  |  |                                                                                                         |  |  |  |  |  |  |  |                                              |  |  |  |  |  |  |  |
| Takai et al, 2017                                                                                          | 108                                                                                                                                                                                                                                                                                                                                                                                                                                                                                                                                                                                                                                                                                                                                                                                                                                                                                                                                                                                                                                                                                                                                                                                                                                                                                                                                                                                                                                                                                                                                                                                                                                                                                                                                                                                                                                                                                                                                                                                                                                                                                                                                                                                                                                                                                                                                                                                                                                                                                                                                                                                                                                                                                                                                                                                                                                                                                                                                                                                                                                                                                                                                                                                                                                                                                                                                                                                                                                                                                                                                                                                                                                                                                                                                                                                                                                                                                                                                                                                                                                                                                                                                                                                                                                                                                                                                                                                                                                                                                                                                                                                                                                                                                                                                                                                                                                                                                                                                                                                                                                                                                                                                                            | 1797        | 16      | 266         | 94.6%         | 1.00 [0.58, 1.72]        |                                  |            |  |                   |        |       |        |       |        |                    |                                  |                         |   |     |   |     |      |                   |  |                    |     |      |    |     |       |                   |  |                       |   |             |   |            |               |                          |  |                      |     |    |    |    |      |                    |  |                                                                                                         |   |     |    |    |       |                   |  |                                              |   |    |   |     |      |                    |  |                    |   |    |   |    |       |                   |  |                    |   |     |   |     |      |                    |  |                   |    |      |    |     |       |                   |  |                  |   |    |   |    |      |                    |  |                          |  |             |  |            |              |                          |  |              |    |  |    |  |  |  |  |                                                                                                           |  |  |  |  |  |  |  |                                              |  |  |  |  |  |  |  |                         |  |  |  |  |  |  |  |                      |   |    |   |    |      |                   |  |                      |   |    |   |    |      |                    |  |                    |   |     |   |     |      |                    |  |                   |    |      |     |      |       |                   |  |                          |  |             |  |             |              |                          |  |              |    |  |     |  |  |  |  |                                                                                                         |  |  |  |  |  |  |  |                                              |  |  |  |  |  |  |  |                       |  |             |  |             |               |                          |  |              |     |  |     |  |  |  |  |                                                                                                            |  |  |  |  |  |  |  |                                              |  |  |  |  |  |  |  |                                                                                                |  |  |  |  |  |  |  |  |     |  |     |  |  |            |  |                   |        |       |        |       |        |                    |                                  |                      |   |    |   |     |      |                    |  |                    |   |     |   |     |      |                    |  |                   |     |      |    |     |       |                   |  |                       |  |             |  |            |               |                          |  |              |     |  |    |  |  |  |  |                                                                                                         |  |  |  |  |  |  |  |                                              |  |  |  |  |  |  |  |
| <b>Total (95% CI)</b>                                                                                      |                                                                                                                                                                                                                                                                                                                                                                                                                                                                                                                                                                                                                                                                                                                                                                                                                                                                                                                                                                                                                                                                                                                                                                                                                                                                                                                                                                                                                                                                                                                                                                                                                                                                                                                                                                                                                                                                                                                                                                                                                                                                                                                                                                                                                                                                                                                                                                                                                                                                                                                                                                                                                                                                                                                                                                                                                                                                                                                                                                                                                                                                                                                                                                                                                                                                                                                                                                                                                                                                                                                                                                                                                                                                                                                                                                                                                                                                                                                                                                                                                                                                                                                                                                                                                                                                                                                                                                                                                                                                                                                                                                                                                                                                                                                                                                                                                                                                                                                                                                                                                                                                                                                                                                | <b>2116</b> |         | <b>551</b>  | <b>100.0%</b> | <b>1.01 [0.60, 1.71]</b> |                                  |            |  |                   |        |       |        |       |        |                    |                                  |                         |   |     |   |     |      |                   |  |                    |     |      |    |     |       |                   |  |                       |   |             |   |            |               |                          |  |                      |     |    |    |    |      |                    |  |                                                                                                         |   |     |    |    |       |                   |  |                                              |   |    |   |     |      |                    |  |                    |   |    |   |    |       |                   |  |                    |   |     |   |     |      |                    |  |                   |    |      |    |     |       |                   |  |                  |   |    |   |    |      |                    |  |                          |  |             |  |            |              |                          |  |              |    |  |    |  |  |  |  |                                                                                                           |  |  |  |  |  |  |  |                                              |  |  |  |  |  |  |  |                         |  |  |  |  |  |  |  |                      |   |    |   |    |      |                   |  |                      |   |    |   |    |      |                    |  |                    |   |     |   |     |      |                    |  |                   |    |      |     |      |       |                   |  |                          |  |             |  |             |              |                          |  |              |    |  |     |  |  |  |  |                                                                                                         |  |  |  |  |  |  |  |                                              |  |  |  |  |  |  |  |                       |  |             |  |             |               |                          |  |              |     |  |     |  |  |  |  |                                                                                                            |  |  |  |  |  |  |  |                                              |  |  |  |  |  |  |  |                                                                                                |  |  |  |  |  |  |  |  |     |  |     |  |  |            |  |                   |        |       |        |       |        |                    |                                  |                      |   |    |   |     |      |                    |  |                    |   |     |   |     |      |                    |  |                   |     |      |    |     |       |                   |  |                       |  |             |  |            |               |                          |  |              |     |  |    |  |  |  |  |                                                                                                         |  |  |  |  |  |  |  |                                              |  |  |  |  |  |  |  |
| Total events                                                                                               | 109                                                                                                                                                                                                                                                                                                                                                                                                                                                                                                                                                                                                                                                                                                                                                                                                                                                                                                                                                                                                                                                                                                                                                                                                                                                                                                                                                                                                                                                                                                                                                                                                                                                                                                                                                                                                                                                                                                                                                                                                                                                                                                                                                                                                                                                                                                                                                                                                                                                                                                                                                                                                                                                                                                                                                                                                                                                                                                                                                                                                                                                                                                                                                                                                                                                                                                                                                                                                                                                                                                                                                                                                                                                                                                                                                                                                                                                                                                                                                                                                                                                                                                                                                                                                                                                                                                                                                                                                                                                                                                                                                                                                                                                                                                                                                                                                                                                                                                                                                                                                                                                                                                                                                            |             | 17      |             |               |                          |                                  |            |  |                   |        |       |        |       |        |                    |                                  |                         |   |     |   |     |      |                   |  |                    |     |      |    |     |       |                   |  |                       |   |             |   |            |               |                          |  |                      |     |    |    |    |      |                    |  |                                                                                                         |   |     |    |    |       |                   |  |                                              |   |    |   |     |      |                    |  |                    |   |    |   |    |       |                   |  |                    |   |     |   |     |      |                    |  |                   |    |      |    |     |       |                   |  |                  |   |    |   |    |      |                    |  |                          |  |             |  |            |              |                          |  |              |    |  |    |  |  |  |  |                                                                                                           |  |  |  |  |  |  |  |                                              |  |  |  |  |  |  |  |                         |  |  |  |  |  |  |  |                      |   |    |   |    |      |                   |  |                      |   |    |   |    |      |                    |  |                    |   |     |   |     |      |                    |  |                   |    |      |     |      |       |                   |  |                          |  |             |  |             |              |                          |  |              |    |  |     |  |  |  |  |                                                                                                         |  |  |  |  |  |  |  |                                              |  |  |  |  |  |  |  |                       |  |             |  |             |               |                          |  |              |     |  |     |  |  |  |  |                                                                                                            |  |  |  |  |  |  |  |                                              |  |  |  |  |  |  |  |                                                                                                |  |  |  |  |  |  |  |  |     |  |     |  |  |            |  |                   |        |       |        |       |        |                    |                                  |                      |   |    |   |     |      |                    |  |                    |   |     |   |     |      |                    |  |                   |     |      |    |     |       |                   |  |                       |  |             |  |            |               |                          |  |              |     |  |    |  |  |  |  |                                                                                                         |  |  |  |  |  |  |  |                                              |  |  |  |  |  |  |  |
| Heterogeneity: Tau <sup>2</sup> = 0.00; Chi <sup>2</sup> = 0.02, df = 2 (P = 0.99); I <sup>2</sup> = 0%    |                                                                                                                                                                                                                                                                                                                                                                                                                                                                                                                                                                                                                                                                                                                                                                                                                                                                                                                                                                                                                                                                                                                                                                                                                                                                                                                                                                                                                                                                                                                                                                                                                                                                                                                                                                                                                                                                                                                                                                                                                                                                                                                                                                                                                                                                                                                                                                                                                                                                                                                                                                                                                                                                                                                                                                                                                                                                                                                                                                                                                                                                                                                                                                                                                                                                                                                                                                                                                                                                                                                                                                                                                                                                                                                                                                                                                                                                                                                                                                                                                                                                                                                                                                                                                                                                                                                                                                                                                                                                                                                                                                                                                                                                                                                                                                                                                                                                                                                                                                                                                                                                                                                                                                |             |         |             |               |                          |                                  |            |  |                   |        |       |        |       |        |                    |                                  |                         |   |     |   |     |      |                   |  |                    |     |      |    |     |       |                   |  |                       |   |             |   |            |               |                          |  |                      |     |    |    |    |      |                    |  |                                                                                                         |   |     |    |    |       |                   |  |                                              |   |    |   |     |      |                    |  |                    |   |    |   |    |       |                   |  |                    |   |     |   |     |      |                    |  |                   |    |      |    |     |       |                   |  |                  |   |    |   |    |      |                    |  |                          |  |             |  |            |              |                          |  |              |    |  |    |  |  |  |  |                                                                                                           |  |  |  |  |  |  |  |                                              |  |  |  |  |  |  |  |                         |  |  |  |  |  |  |  |                      |   |    |   |    |      |                   |  |                      |   |    |   |    |      |                    |  |                    |   |     |   |     |      |                    |  |                   |    |      |     |      |       |                   |  |                          |  |             |  |             |              |                          |  |              |    |  |     |  |  |  |  |                                                                                                         |  |  |  |  |  |  |  |                                              |  |  |  |  |  |  |  |                       |  |             |  |             |               |                          |  |              |     |  |     |  |  |  |  |                                                                                                            |  |  |  |  |  |  |  |                                              |  |  |  |  |  |  |  |                                                                                                |  |  |  |  |  |  |  |  |     |  |     |  |  |            |  |                   |        |       |        |       |        |                    |                                  |                      |   |    |   |     |      |                    |  |                    |   |     |   |     |      |                    |  |                   |     |      |    |     |       |                   |  |                       |  |             |  |            |               |                          |  |              |     |  |    |  |  |  |  |                                                                                                         |  |  |  |  |  |  |  |                                              |  |  |  |  |  |  |  |
| Test for overall effect: Z = 0.03 (P = 0.97)                                                               |                                                                                                                                                                                                                                                                                                                                                                                                                                                                                                                                                                                                                                                                                                                                                                                                                                                                                                                                                                                                                                                                                                                                                                                                                                                                                                                                                                                                                                                                                                                                                                                                                                                                                                                                                                                                                                                                                                                                                                                                                                                                                                                                                                                                                                                                                                                                                                                                                                                                                                                                                                                                                                                                                                                                                                                                                                                                                                                                                                                                                                                                                                                                                                                                                                                                                                                                                                                                                                                                                                                                                                                                                                                                                                                                                                                                                                                                                                                                                                                                                                                                                                                                                                                                                                                                                                                                                                                                                                                                                                                                                                                                                                                                                                                                                                                                                                                                                                                                                                                                                                                                                                                                                                |             |         |             |               |                          |                                  |            |  |                   |        |       |        |       |        |                    |                                  |                         |   |     |   |     |      |                   |  |                    |     |      |    |     |       |                   |  |                       |   |             |   |            |               |                          |  |                      |     |    |    |    |      |                    |  |                                                                                                         |   |     |    |    |       |                   |  |                                              |   |    |   |     |      |                    |  |                    |   |    |   |    |       |                   |  |                    |   |     |   |     |      |                    |  |                   |    |      |    |     |       |                   |  |                  |   |    |   |    |      |                    |  |                          |  |             |  |            |              |                          |  |              |    |  |    |  |  |  |  |                                                                                                           |  |  |  |  |  |  |  |                                              |  |  |  |  |  |  |  |                         |  |  |  |  |  |  |  |                      |   |    |   |    |      |                   |  |                      |   |    |   |    |      |                    |  |                    |   |     |   |     |      |                    |  |                   |    |      |     |      |       |                   |  |                          |  |             |  |             |              |                          |  |              |    |  |     |  |  |  |  |                                                                                                         |  |  |  |  |  |  |  |                                              |  |  |  |  |  |  |  |                       |  |             |  |             |               |                          |  |              |     |  |     |  |  |  |  |                                                                                                            |  |  |  |  |  |  |  |                                              |  |  |  |  |  |  |  |                                                                                                |  |  |  |  |  |  |  |  |     |  |     |  |  |            |  |                   |        |       |        |       |        |                    |                                  |                      |   |    |   |     |      |                    |  |                    |   |     |   |     |      |                    |  |                   |     |      |    |     |       |                   |  |                       |  |             |  |            |               |                          |  |              |     |  |    |  |  |  |  |                                                                                                         |  |  |  |  |  |  |  |                                              |  |  |  |  |  |  |  |
| G                                                                                                          | <p><b>All-cause Mortality</b></p> <p><b>Forest Plot of All-cause Mortality (Conventional Pairwise Meta-Analysis)</b></p>                                                                                                                                                                                                                                                                                                                                                                                                                                                                                                                                                                                                                                                                                                                                                                                                                                                                                                                                                                                                                                                                                                                                                                                                                                                                                                                                                                                                                                                                                                                                                                                                                                                                                                                                                                                                                                                                                                                                                                                                                                                                                                                                                                                                                                                                                                                                                                                                                                                                                                                                                                                                                                                                                                                                                                                                                                                                                                                                                                                                                                                                                                                                                                                                                                                                                                                                                                                                                                                                                                                                                                                                                                                                                                                                                                                                                                                                                                                                                                                                                                                                                                                                                                                                                                                                                                                                                                                                                                                                                                                                                                                                                                                                                                                                                                                                                                                                                                                                                                                                                                       |             |         |             |               |                          |                                  |            |  |                   |        |       |        |       |        |                    |                                  |                         |   |     |   |     |      |                   |  |                    |     |      |    |     |       |                   |  |                       |   |             |   |            |               |                          |  |                      |     |    |    |    |      |                    |  |                                                                                                         |   |     |    |    |       |                   |  |                                              |   |    |   |     |      |                    |  |                    |   |    |   |    |       |                   |  |                    |   |     |   |     |      |                    |  |                   |    |      |    |     |       |                   |  |                  |   |    |   |    |      |                    |  |                          |  |             |  |            |              |                          |  |              |    |  |    |  |  |  |  |                                                                                                           |  |  |  |  |  |  |  |                                              |  |  |  |  |  |  |  |                         |  |  |  |  |  |  |  |                      |   |    |   |    |      |                   |  |                      |   |    |   |    |      |                    |  |                    |   |     |   |     |      |                    |  |                   |    |      |     |      |       |                   |  |                          |  |             |  |             |              |                          |  |              |    |  |     |  |  |  |  |                                                                                                         |  |  |  |  |  |  |  |                                              |  |  |  |  |  |  |  |                       |  |             |  |             |               |                          |  |              |     |  |     |  |  |  |  |                                                                                                            |  |  |  |  |  |  |  |                                              |  |  |  |  |  |  |  |                                                                                                |  |  |  |  |  |  |  |  |     |  |     |  |  |            |  |                   |        |       |        |       |        |                    |                                  |                      |   |    |   |     |      |                    |  |                    |   |     |   |     |      |                    |  |                   |     |      |    |     |       |                   |  |                       |  |             |  |            |               |                          |  |              |     |  |    |  |  |  |  |                                                                                                         |  |  |  |  |  |  |  |                                              |  |  |  |  |  |  |  |





**Figure S2.** Overall operative procedure

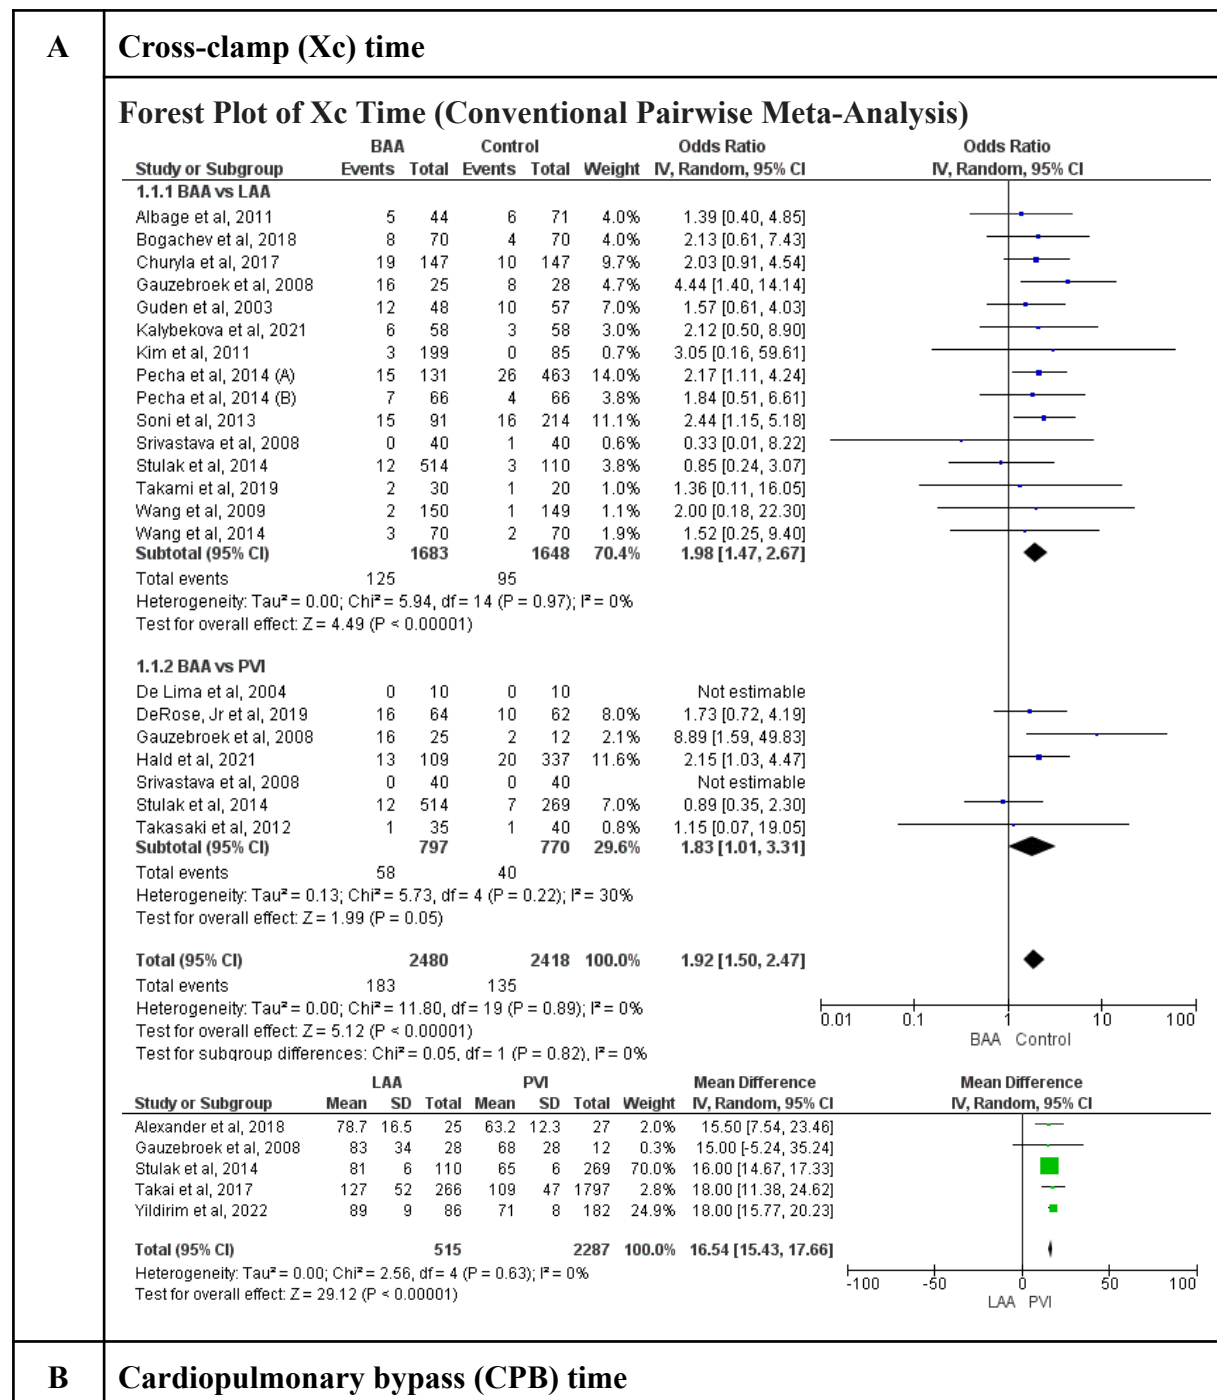

## Forest Plot of CPB Time (Conventional Pairwise Meta-Analysis)

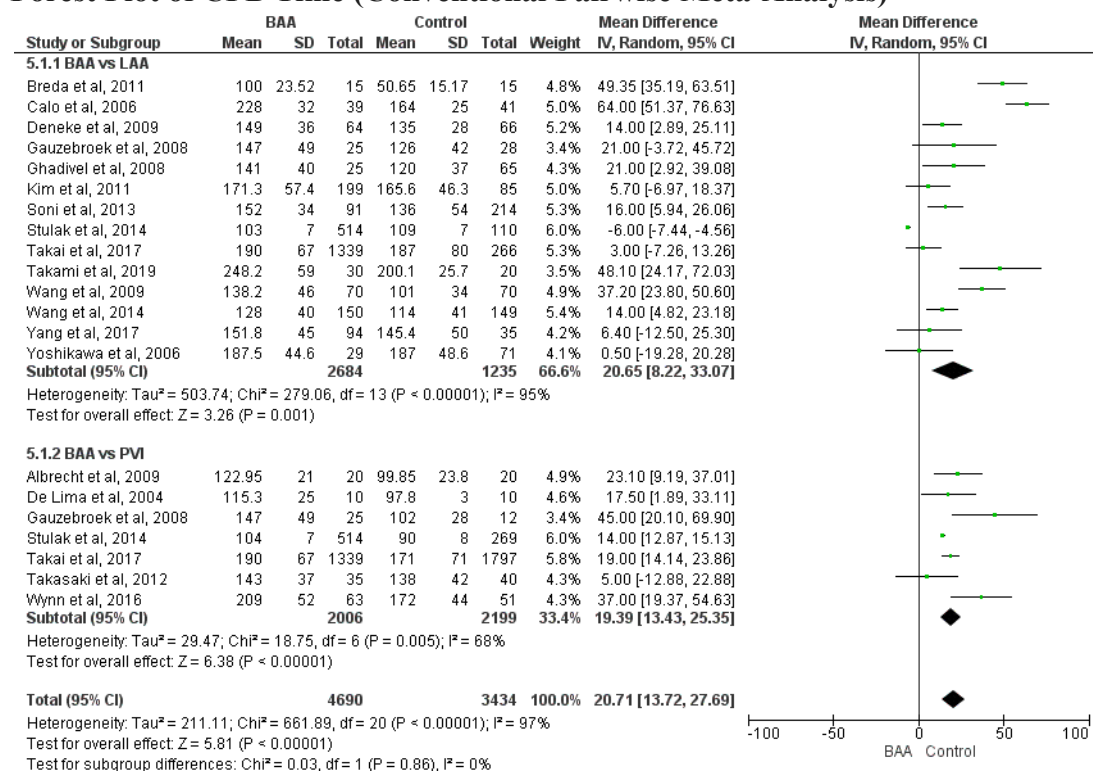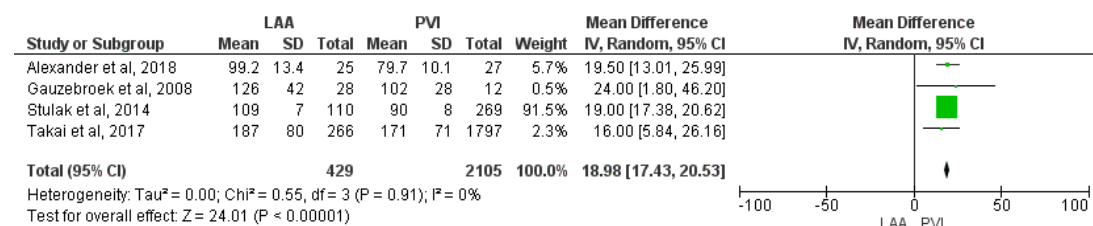

## C Ablation Time

### Forest Plot of Ablation Time (Conventional Pairwise Meta-Analysis)

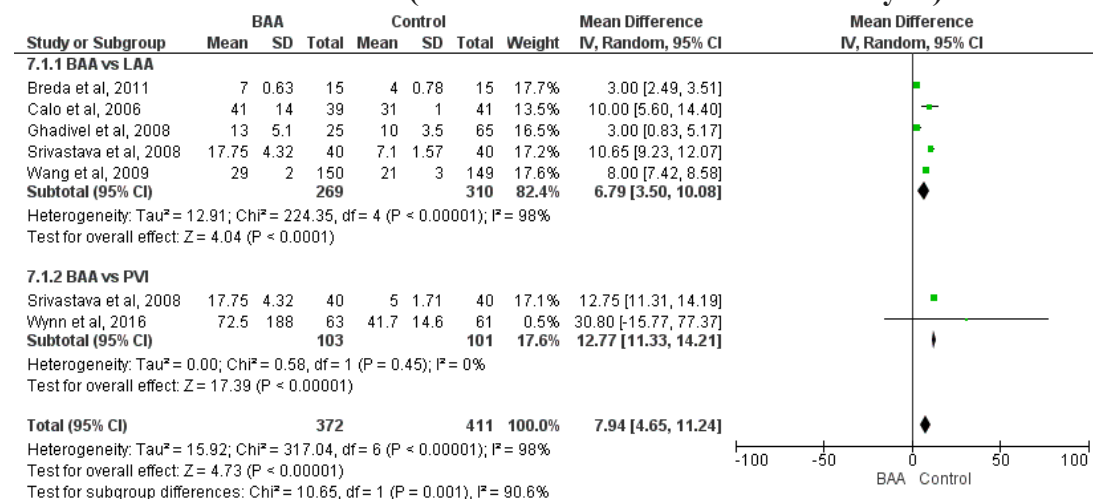

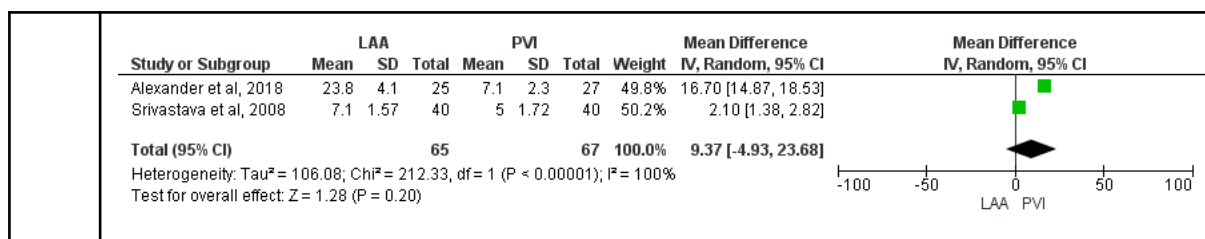

Overall operative procedure time was reported for patients who underwent ablation surgery. (A) Forest plot for cross-clamp (Xc) time demonstrating insignificant heterogeneity; (B) Forest plot for cardiopulmonary bypass (CPB) time demonstrating insignificant to high heterogeneity; (C) Forest plot for the ablation time demonstrating high heterogeneity.

**Figure S3.** Hospital admission and stay

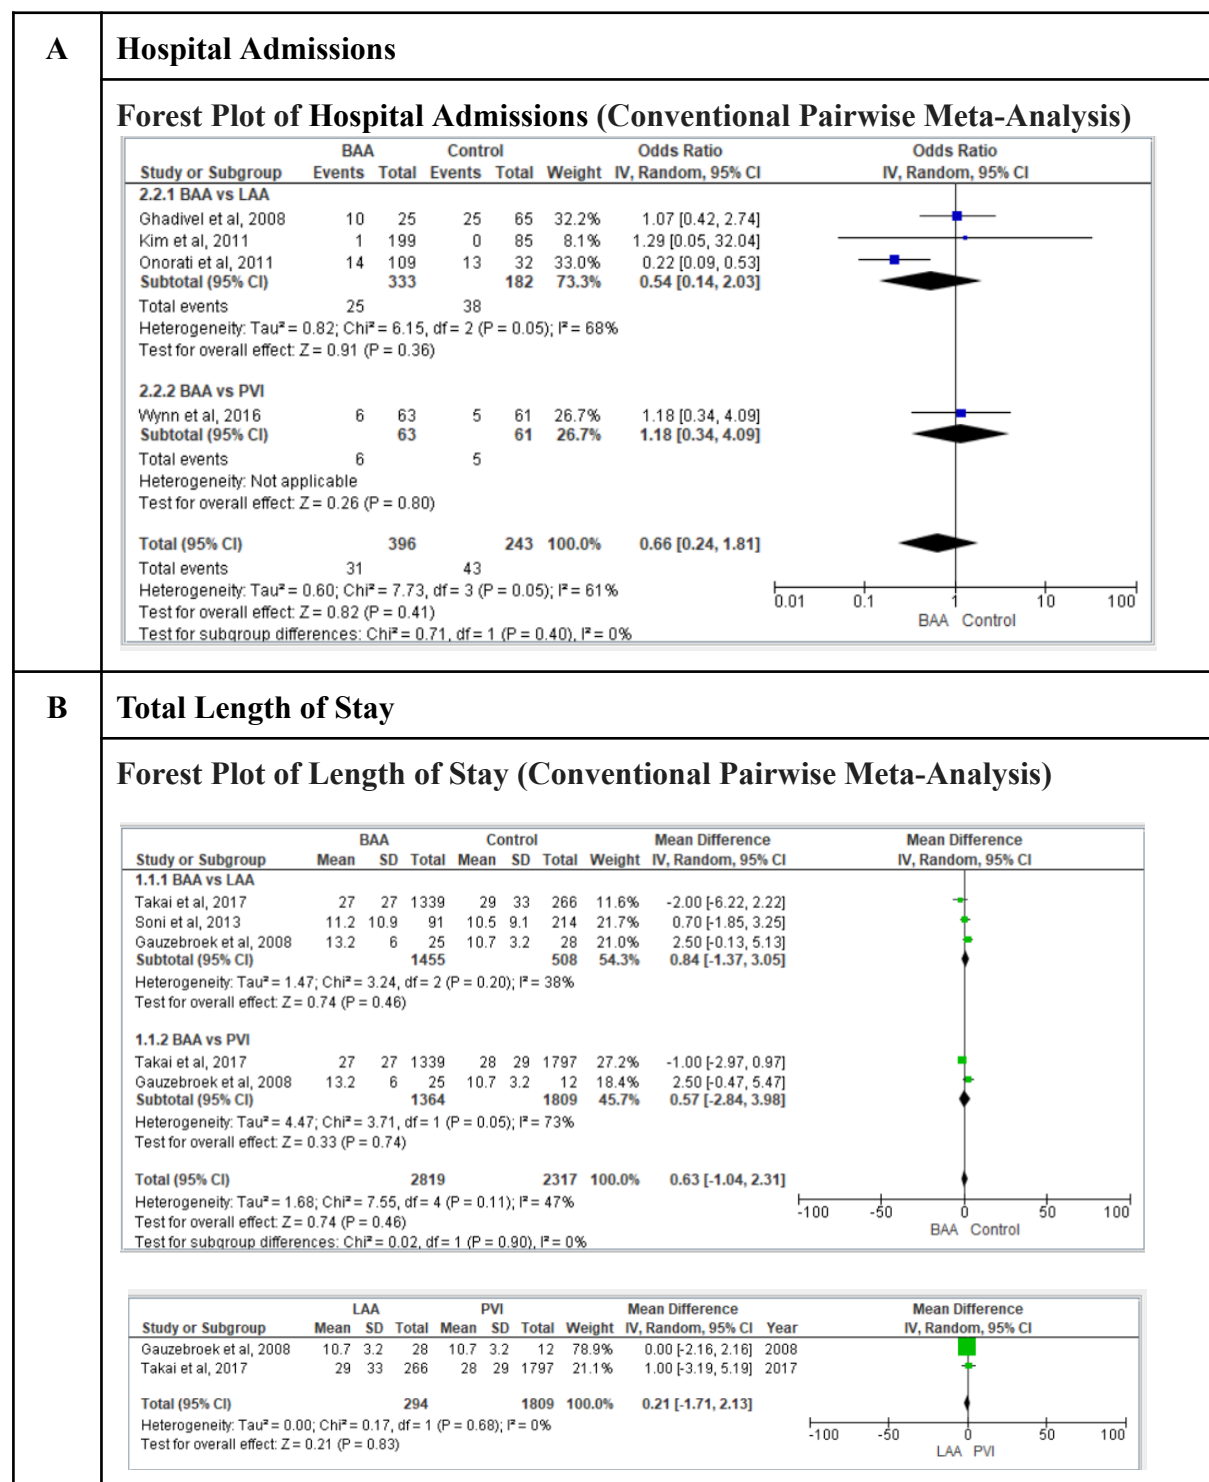

Overall hospital stay reported for patients who underwent MVr/R surgery.

(A) Forest plot for hospital admissions demonstrating insignificant heterogeneity; (B) Forest plot for the total length of stay in the hospital demonstrating low until insignificant heterogeneity.

|  |  |  | Table S6. Critical Appraisal |  |  |  |  |  |  |  |  |  |  |  |  |  |  |  |  |  |  |  |  |  |  |  |  |  |  |  |  |  |  |  |  |  |  |  |  |  |  |  |
|--|--|--|------------------------------|--|--|--|--|--|--|--|--|--|--|--|--|--|--|--|--|--|--|--|--|--|--|--|--|--|--|--|--|--|--|--|--|--|--|--|--|--|--|--|
|  |  |  | Critical Appraisal           |  |  |  |  |  |  |  |  |  |  |  |  |  |  |  |  |  |  |  |  |  |  |  |  |  |  |  |  |  |  |  |  |  |  |  |  |  |  |  |
|  |  |  | Critical Appraisal           |  |  |  |  |  |  |  |  |  |  |  |  |  |  |  |  |  |  |  |  |  |  |  |  |  |  |  |  |  |  |  |  |  |  |  |  |  |  |  |
|  |  |  | Critical Appraisal           |  |  |  |  |  |  |  |  |  |  |  |  |  |  |  |  |  |  |  |  |  |  |  |  |  |  |  |  |  |  |  |  |  |  |  |  |  |  |  |
|  |  |  | Critical Appraisal           |  |  |  |  |  |  |  |  |  |  |  |  |  |  |  |  |  |  |  |  |  |  |  |  |  |  |  |  |  |  |  |  |  |  |  |  |  |  |  |
|  |  |  | Critical Appraisal           |  |  |  |  |  |  |  |  |  |  |  |  |  |  |  |  |  |  |  |  |  |  |  |  |  |  |  |  |  |  |  |  |  |  |  |  |  |  |  |
|  |  |  | Critical Appraisal           |  |  |  |  |  |  |  |  |  |  |  |  |  |  |  |  |  |  |  |  |  |  |  |  |  |  |  |  |  |  |  |  |  |  |  |  |  |  |  |
|  |  |  | Critical Appraisal           |  |  |  |  |  |  |  |  |  |  |  |  |  |  |  |  |  |  |  |  |  |  |  |  |  |  |  |  |  |  |  |  |  |  |  |  |  |  |  |
|  |  |  | Critical Appraisal           |  |  |  |  |  |  |  |  |  |  |  |  |  |  |  |  |  |  |  |  |  |  |  |  |  |  |  |  |  |  |  |  |  |  |  |  |  |  |  |
|  |  |  | Critical Appraisal           |  |  |  |  |  |  |  |  |  |  |  |  |  |  |  |  |  |  |  |  |  |  |  |  |  |  |  |  |  |  |  |  |  |  |  |  |  |  |  |
|  |  |  | Critical Appraisal           |  |  |  |  |  |  |  |  |  |  |  |  |  |  |  |  |  |  |  |  |  |  |  |  |  |  |  |  |  |  |  |  |  |  |  |  |  |  |  |
|  |  |  | Critical Appraisal           |  |  |  |  |  |  |  |  |  |  |  |  |  |  |  |  |  |  |  |  |  |  |  |  |  |  |  |  |  |  |  |  |  |  |  |  |  |  |  |
|  |  |  | Critical Appraisal           |  |  |  |  |  |  |  |  |  |  |  |  |  |  |  |  |  |  |  |  |  |  |  |  |  |  |  |  |  |  |  |  |  |  |  |  |  |  |  |
|  |  |  | Critical Appraisal           |  |  |  |  |  |  |  |  |  |  |  |  |  |  |  |  |  |  |  |  |  |  |  |  |  |  |  |  |  |  |  |  |  |  |  |  |  |  |  |
|  |  |  | Critical Appraisal           |  |  |  |  |  |  |  |  |  |  |  |  |  |  |  |  |  |  |  |  |  |  |  |  |  |  |  |  |  |  |  |  |  |  |  |  |  |  |  |
|  |  |  | Critical Appraisal           |  |  |  |  |  |  |  |  |  |  |  |  |  |  |  |  |  |  |  |  |  |  |  |  |  |  |  |  |  |  |  |  |  |  |  |  |  |  |  |
|  |  |  | Critical Appraisal           |  |  |  |  |  |  |  |  |  |  |  |  |  |  |  |  |  |  |  |  |  |  |  |  |  |  |  |  |  |  |  |  |  |  |  |  |  |  |  |
|  |  |  | Critical Appraisal           |  |  |  |  |  |  |  |  |  |  |  |  |  |  |  |  |  |  |  |  |  |  |  |  |  |  |  |  |  |  |  |  |  |  |  |  |  |  |  |
|  |  |  | Critical Appraisal           |  |  |  |  |  |  |  |  |  |  |  |  |  |  |  |  |  |  |  |  |  |  |  |  |  |  |  |  |  |  |  |  |  |  |  |  |  |  |  |
|  |  |  | Critical Appraisal           |  |  |  |  |  |  |  |  |  |  |  |  |  |  |  |  |  |  |  |  |  |  |  |  |  |  |  |  |  |  |  |  |  |  |  |  |  |  |  |
|  |  |  | Critical Appraisal           |  |  |  |  |  |  |  |  |  |  |  |  |  |  |  |  |  |  |  |  |  |  |  |  |  |  |  |  |  |  |  |  |  |  |  |  |  |  |  |
|  |  |  | Critical Appraisal           |  |  |  |  |  |  |  |  |  |  |  |  |  |  |  |  |  |  |  |  |  |  |  |  |  |  |  |  |  |  |  |  |  |  |  |  |  |  |  |
|  |  |  | Critical Appraisal           |  |  |  |  |  |  |  |  |  |  |  |  |  |  |  |  |  |  |  |  |  |  |  |  |  |  |  |  |  |  |  |  |  |  |  |  |  |  |  |
|  |  |  | Critical Appraisal           |  |  |  |  |  |  |  |  |  |  |  |  |  |  |  |  |  |  |  |  |  |  |  |  |  |  |  |  |  |  |  |  |  |  |  |  |  |  |  |
|  |  |  | Critical Appraisal           |  |  |  |  |  |  |  |  |  |  |  |  |  |  |  |  |  |  |  |  |  |  |  |  |  |  |  |  |  |  |  |  |  |  |  |  |  |  |  |
|  |  |  | Critical Appraisal           |  |  |  |  |  |  |  |  |  |  |  |  |  |  |  |  |  |  |  |  |  |  |  |  |  |  |  |  |  |  |  |  |  |  |  |  |  |  |  |
|  |  |  | Critical Appraisal           |  |  |  |  |  |  |  |  |  |  |  |  |  |  |  |  |  |  |  |  |  |  |  |  |  |  |  |  |  |  |  |  |  |  |  |  |  |  |  |
|  |  |  | Critical Appraisal           |  |  |  |  |  |  |  |  |  |  |  |  |  |  |  |  |  |  |  |  |  |  |  |  |  |  |  |  |  |  |  |  |  |  |  |  |  |  |  |
|  |  |  | Critical Appraisal           |  |  |  |  |  |  |  |  |  |  |  |  |  |  |  |  |  |  |  |  |  |  |  |  |  |  |  |  |  |  |  |  |  |  |  |  |  |  |  |
|  |  |  | Critical Appraisal           |  |  |  |  |  |  |  |  |  |  |  |  |  |  |  |  |  |  |  |  |  |  |  |  |  |  |  |  |  |  |  |  |  |  |  |  |  |  |  |
|  |  |  | Critical Appraisal           |  |  |  |  |  |  |  |  |  |  |  |  |  |  |  |  |  |  |  |  |  |  |  |  |  |  |  |  |  |  |  |  |  |  |  |  |  |  |  |
|  |  |  | Critical Appraisal           |  |  |  |  |  |  |  |  |  |  |  |  |  |  |  |  |  |  |  |  |  |  |  |  |  |  |  |  |  |  |  |  |  |  |  |  |  |  |  |
|  |  |  | Critical Appraisal           |  |  |  |  |  |  |  |  |  |  |  |  |  |  |  |  |  |  |  |  |  |  |  |  |  |  |  |  |  |  |  |  |  |  |  |  |  |  |  |
|  |  |  | Critical Appraisal           |  |  |  |  |  |  |  |  |  |  |  |  |  |  |  |  |  |  |  |  |  |  |  |  |  |  |  |  |  |  |  |  |  |  |  |  |  |  |  |
|  |  |  | Critical Appraisal           |  |  |  |  |  |  |  |  |  |  |  |  |  |  |  |  |  |  |  |  |  |  |  |  |  |  |  |  |  |  |  |  |  |  |  |  |  |  |  |
|  |  |  | Critical Appraisal           |  |  |  |  |  |  |  |  |  |  |  |  |  |  |  |  |  |  |  |  |  |  |  |  |  |  |  |  |  |  |  |  |  |  |  |  |  |  |  |
|  |  |  | Critical Appraisal           |  |  |  |  |  |  |  |  |  |  |  |  |  |  |  |  |  |  |  |  |  |  |  |  |  |  |  |  |  |  |  |  |  |  |  |  |  |  |  |
|  |  |  | Critical Appraisal           |  |  |  |  |  |  |  |  |  |  |  |  |  |  |  |  |  |  |  |  |  |  |  |  |  |  |  |  |  |  |  |  |  |  |  |  |  |  |  |
|  |  |  | Critical Appraisal           |  |  |  |  |  |  |  |  |  |  |  |  |  |  |  |  |  |  |  |  |  |  |  |  |  |  |  |  |  |  |  |  |  |  |  |  |  |  |  |
|  |  |  | Critical Appraisal           |  |  |  |  |  |  |  |  |  |  |  |  |  |  |  |  |  |  |  |  |  |  |  |  |  |  |  |  |  |  |  |  |  |  |  |  |  |  |  |
|  |  |  | Critical Appraisal           |  |  |  |  |  |  |  |  |  |  |  |  |  |  |  |  |  |  |  |  |  |  |  |  |  |  |  |  |  |  |  |  |  |  |  |  |  |  |  |
|  |  |  | Critical Appraisal           |  |  |  |  |  |  |  |  |  |  |  |  |  |  |  |  |  |  |  |  |  |  |  |  |  |  |  |  |  |  |  |  |  |  |  |  |  |  |  |
|  |  |  | Critical Appraisal           |  |  |  |  |  |  |  |  |  |  |  |  |  |  |  |  |  |  |  |  |  |  |  |  |  |  |  |  |  |  |  |  |  |  |  |  |  |  |  |
|  |  |  | Critical Appraisal           |  |  |  |  |  |  |  |  |  |  |  |  |  |  |  |  |  |  |  |  |  |  |  |  |  |  |  |  |  |  |  |  |  |  |  |  |  |  |  |
|  |  |  | Critical Appraisal           |  |  |  |  |  |  |  |  |  |  |  |  |  |  |  |  |  |  |  |  |  |  |  |  |  |  |  |  |  |  |  |  |  |  |  |  |  |  |  |
|  |  |  | Critical Appraisal           |  |  |  |  |  |  |  |  |  |  |  |  |  |  |  |  |  |  |  |  |  |  |  |  |  |  |  |  |  |  |  |  |  |  |  |  |  |  |  |
|  |  |  | Critical Appraisal           |  |  |  |  |  |  |  |  |  |  |  |  |  |  |  |  |  |  |  |  |  |  |  |  |  |  |  |  |  |  |  |  |  |  |  |  |  |  |  |
|  |  |  | Critical Appraisal           |  |  |  |  |  |  |  |  |  |  |  |  |  |  |  |  |  |  |  |  |  |  |  |  |  |  |  |  |  |  |  |  |  |  |  |  |  |  |  |
|  |  |  | Critical Appraisal           |  |  |  |  |  |  |  |  |  |  |  |  |  |  |  |  |  |  |  |  |  |  |  |  |  |  |  |  |  |  |  |  |  |  |  |  |  |  |  |
|  |  |  | Critical Appraisal           |  |  |  |  |  |  |  |  |  |  |  |  |  |  |  |  |  |  |  |  |  |  |  |  |  |  |  |  |  |  |  |  |  |  |  |  |  |  |  |
|  |  |  | Critical Appraisal           |  |  |  |  |  |  |  |  |  |  |  |  |  |  |  |  |  |  |  |  |  |  |  |  |  |  |  |  |  |  |  |  |  |  |  |  |  |  |  |
|  |  |  | Critical Appraisal           |  |  |  |  |  |  |  |  |  |  |  |  |  |  |  |  |  |  |  |  |  |  |  |  |  |  |  |  |  |  |  |  |  |  |  |  |  |  |  |
|  |  |  | Critical Appraisal           |  |  |  |  |  |  |  |  |  |  |  |  |  |  |  |  |  |  |  |  |  |  |  |  |  |  |  |  |  |  |  |  |  |  |  |  |  |  |  |
|  |  |  | Critical Appraisal           |  |  |  |  |  |  |  |  |  |  |  |  |  |  |  |  |  |  |  |  |  |  |  |  |  |  |  |  |  |  |  |  |  |  |  |  |  |  |  |
|  |  |  | Critical Appraisal           |  |  |  |  |  |  |  |  |  |  |  |  |  |  |  |  |  |  |  |  |  |  |  |  |  |  |  |  |  |  |  |  |  |  |  |  |  |  |  |
|  |  |  | Critical Appraisal           |  |  |  |  |  |  |  |  |  |  |  |  |  |  |  |  |  |  |  |  |  |  |  |  |  |  |  |  |  |  |  |  |  |  |  |  |  |  |  |
|  |  |  | Critical Appraisal           |  |  |  |  |  |  |  |  |  |  |  |  |  |  |  |  |  |  |  |  |  |  |  |  |  |  |  |  |  |  |  |  |  |  |  |  |  |  |  |
|  |  |  | Critical Appraisal           |  |  |  |  |  |  |  |  |  |  |  |  |  |  |  |  |  |  |  |  |  |  |  |  |  |  |  |  |  |  |  |  |  |  |  |  |  |  |  |
|  |  |  | Critical Appraisal           |  |  |  |  |  |  |  |  |  |  |  |  |  |  |  |  |  |  |  |  |  |  |  |  |  |  |  |  |  |  |  |  |  |  |  |  |  |  |  |
|  |  |  | Critical Appraisal           |  |  |  |  |  |  |  |  |  |  |  |  |  |  |  |  |  |  |  |  |  |  |  |  |  |  |  |  |  |  |  |  |  |  |  |  |  |  |  |
|  |  |  | Critical Appraisal           |  |  |  |  |  |  |  |  |  |  |  |  |  |  |  |  |  |  |  |  |  |  |  |  |  |  |  |  |  |  |  |  |  |  |  |  |  |  |  |
|  |  |  | Critical Appraisal           |  |  |  |  |  |  |  |  |  |  |  |  |  |  |  |  |  |  |  |  |  |  |  |  |  |  |  |  |  |  |  |  |  |  |  |  |  |  |  |
|  |  |  | Critical Appraisal           |  |  |  |  |  |  |  |  |  |  |  |  |  |  |  |  |  |  |  |  |  |  |  |  |  |  |  |  |  |  |  |  |  |  |  |  |  |  |  |
|  |  |  | Critical Appraisal           |  |  |  |  |  |  |  |  |  |  |  |  |  |  |  |  |  |  |  |  |  |  |  |  |  |  |  |  |  |  |  |  |  |  |  |  |  |  |  |
|  |  |  | Critical Appraisal           |  |  |  |  |  |  |  |  |  |  |  |  |  |  |  |  |  |  |  |  |  |  |  |  |  |  |  |  |  |  |  |  |  |  |  |  |  |  |  |
|  |  |  | Critical Appraisal           |  |  |  |  |  |  |  |  |  |  |  |  |  |  |  |  |  |  |  |  |  |  |  |  |  |  |  |  |  |  |  |  |  |  |  |  |  |  |  |
|  |  |  | Critical Appraisal           |  |  |  |  |  |  |  |  |  |  |  |  |  |  |  |  |  |  |  |  |  |  |  |  |  |  |  |  |  |  |  |  |  |  |  |  |  |  |  |
|  |  |  | Critical Appraisal           |  |  |  |  |  |  |  |  |  |  |  |  |  |  |  |  |  |  |  |  |  |  |  |  |  |  |  |  |  |  |  |  |  |  |  |  |  |  |  |
|  |  |  | Critical Appraisal           |  |  |  |  |  |  |  |  |  |  |  |  |  |  |  |  |  |  |  |  |  |  |  |  |  |  |  |  |  |  |  |  |  |  |  |  |  |  |  |
|  |  |  | Critical Appraisal           |  |  |  |  |  |  |  |  |  |  |  |  |  |  |  |  |  |  |  |  |  |  |  |  |  |  |  |  |  |  |  |  |  |  |  |  |  |  |  |
|  |  |  | Critical Appraisal           |  |  |  |  |  |  |  |  |  |  |  |  |  |  |  |  |  |  |  |  |  |  |  |  |  |  |  |  |  |  |  |  |  |  |  |  |  |  |  |
|  |  |  | Critical Appraisal           |  |  |  |  |  |  |  |  |  |  |  |  |  |  |  |  |  |  |  |  |  |  |  |  |  |  |  |  |  |  |  |  |  |  |  |  |  |  |  |
|  |  |  | Critical Appraisal           |  |  |  |  |  |  |  |  |  |  |  |  |  |  |  |  |  |  |  |  |  |  |  |  |  |  |  |  |  |  |  |  |  |  |  |  |  |  |  |
|  |  |  | Critical Appraisal           |  |  |  |  |  |  |  |  |  |  |  |  |  |  |  |  |  |  |  |  |  |  |  |  |  |  |  |  |  |  |  |  |  |  |  |  |  |  |  |
|  |  |  | Critical Appraisal           |  |  |  |  |  |  |  |  |  |  |  |  |  |  |  |  |  |  |  |  |  |  |  |  |  |  |  |  |  |  |  |  |  |  |  |  |  |  |  |
|  |  |  | Critical Appraisal           |  |  |  |  |  |  |  |  |  |  |  |  |  |  |  |  |  |  |  |  |  |  |  |  |  |  |  |  |  |  |  |  |  |  |  |  |  |  |  |
|  |  |  | Critical Appraisal           |  |  |  |  |  |  |  |  |  |  |  |  |  |  |  |  |  |  |  |  |  |  |  |  |  |  |  |  |  |  |  |  |  |  |  |  |  |  |  |
|  |  |  | Critical Appraisal           |  |  |  |  |  |  |  |  |  |  |  |  |  |  |  |  |  |  |  |  |  |  |  |  |  |  |  |  |  |  |  |  |  |  |  |  |  |  |  |
|  |  |  | Critical Appraisal           |  |  |  |  |  |  |  |  |  |  |  |  |  |  |  |  |  |  |  |  |  |  |  |  |  |  |  |  |  |  |  |  |  |  |  |  |  |  |  |
|  |  |  | Critical Appraisal           |  |  |  |  |  |  |  |  |  |  |  |  |  |  |  |  |  |  |  |  |  |  |  |  |  |  |  |  |  |  |  |  |  |  |  |  |  |  |  |
|  |  |  | Critical Appraisal           |  |  |  |  |  |  |  |  |  |  |  |  |  |  |  |  |  |  |  |  |  |  |  |  |  |  |  |  |  |  |  |  |  |  |  |  |  |  |  |
|  |  |  | Critical Appraisal           |  |  |  |  |  |  |  |  |  |  |  |  |  |  |  |  |  |  |  |  |  |  |  |  |  |  |  |  |  |  |  |  |  |  |  |  |  |  |  |
|  |  |  | Critical Appraisal           |  |  |  |  |  |  |  |  |  |  |  |  |  |  |  |  |  |  |  |  |  |  |  |  |  |  |  |  |  |  |  |  |  |  |  |  |  |  |  |
|  |  |  | Critical Appraisal           |  |  |  |  |  |  |  |  |  |  |  |  |  |  |  |  |  |  |  |  |  |  |  |  |  |  |  |  |  |  |  |  |  |  |  |  |  |  |  |
|  |  |  | Critical Appraisal           |  |  |  |  |  |  |  |  |  |  |  |  |  |  |  |  |  |  |  |  |  |  |  |  |  |  |  |  |  |  |  |  |  |  |  |  |  |  |  |
|  |  |  | Critical Appraisal           |  |  |  |  |  |  |  |  |  |  |  |  |  |  |  |  |  |  |  |  |  |  |  |  |  |  |  |  |  |  |  |  |  |  |  |  |  |  |  |
|  |  |  | Critical Appraisal           |  |  |  |  |  |  |  |  |  |  |  |  |  |  |  |  |  |  |  |  |  |  |  |  |  |  |  |  |  |  |  |  |  |  |  |  |  |  |  |
|  |  |  | Critical Appraisal           |  |  |  |  |  |  |  |  |  |  |  |  |  |  |  |  |  |  |  |  |  |  |  |  |  |  |  |  |  |  |  |  |  |  |  |  |  |  |  |
|  |  |  | Critical Appraisal           |  |  |  |  |  |  |  |  |  |  |  |  |  |  |  |  |  |  |  |  |  |  |  |  |  |  |  |  |  |  |  |  |  |  |  |  |  |  |  |
|  |  |  | Critical Appraisal           |  |  |  |  |  |  |  |  |  |  |  |  |  |  |  |  |  |  |  |  |  |  |  |  |  |  |  |  |  |  |  |  |  |  |  |  |  |  |  |
|  |  |  | Critical Appraisal           |  |  |  |  |  |  |  |  |  |  |  |  |  |  |  |  |  |  |  |  |  |  |  |  |  |  |  |  |  |  |  |  |  |  |  |  |  |  |  |
|  |  |  | Critical Appraisal           |  |  |  |  |  |  |  |  |  |  |  |  |  |  |  |  |  |  |  |  |  |  |  |  |  |  |  |  |  |  |  |  |  |  |  |  |  |  |  |
|  |  |  | Critical Appraisal           |  |  |  |  |  |  |  |  |  |  |  |  |  |  |  |  |  |  |  |  |  |  |  |  |  |  |  |  |  |  |  |  |  |  |  |  |  |  |  |
|  |  |  | Critical Appraisal           |  |  |  |  |  |  |  |  |  |  |  |  |  |  |  |  |  |  |  |  |  |  |  |  |  |  |  |  |  |  |  |  |  |  |  |  |  |  |  |
|  |  |  | Critical Appraisal           |  |  |  |  |  |  |  |  |  |  |  |  |  |  |  |  |  |  |  |  |  |  |  |  |  |  |  |  |  |  |  |  |  |  |  |  |  |  |  |
|  |  |  | Critical Appraisal           |  |  |  |  |  |  |  |  |  |  |  |  |  |  |  |  |  |  |  |  |  |  |  |  |  |  |  |  |  |  |  |  |  |  |  |  |  |  |  |
|  |  |  | Critical Appraisal           |  |  |  |  |  |  |  |  |  |  |  |  |  |  |  |  |  |  |  |  |  |  |  |  |  |  |  |  |  |  |  |  |  |  |  |  |  |  |  |
|  |  |  | Critical Appraisal           |  |  |  |  |  |  |  |  |  |  |  |  |  |  |  |  |  |  |  |  |  |  |  |  |  |  |  |  |  |  |  |  |  |  |  |  |  |  |  |
|  |  |  | Critical Appraisal           |  |  |  |  |  |  |  |  |  |  |  |  |  |  |  |  |  |  |  |  |  |  |  |  |  |  |  |  |  |  |  |  |  |  |  |  |  |  |  |
|  |  |  | Critical Appraisal           |  |  |  |  |  |  |  |  |  |  |  |  |  |  |  |  |  |  |  |  |  |  |  |  |  |  |  |  |  |  |  |  |  |  |  |  |  |  |  |
|  |  |  | Critical Appraisal           |  |  |  |  |  |  |  |  |  |  |  |  |  |  |  |  |  |  |  |  |  |  |  |  |  |  |  |  |  |  |  |  |  |  |  |  |  |  |  |
|  |  |  | Critical Appraisal           |  |  |  |  |  |  |  |  |  |  |  |  |  |  |  |  |  |  |  |  |  |  |  |  |  |  |  |  |  |  |  |  |  |  |  |  |  |  |  |
|  |  |  | Critical Appraisal           |  |  |  |  |  |  |  |  |  |  |  |  |  |  |  |  |  |  |  |  |  |  |  |  |  |  |  |  |  |  |  |  |  |  |  |  |  |  |  |
|  |  |  | Critical Appraisal           |  |  |  |  |  |  |  |  |  |  |  |  |  |  |  |  |  |  |  |  |  |  |  |  |  |  |  |  |  |  |  |  |  |  |  |  |  |  |  |
|  |  |  | Critical Appraisal           |  |  |  |  |  |  |  |  |  |  |  |  |  |  |  |  |  |  |  |  |  |  |  |  |  |  |  |  |  |  |  |  |  |  |  |  |  |  |  |
|  |  |  | Critical Appraisal           |  |  |  |  |  |  |  |  |  |  |  |  |  |  |  |  |  |  |  |  |  |  |  |  |  |  |  |  |  |  |  |  |  |  |  |  |  |  |  |
|  |  |  | Critical Appraisal           |  |  |  |  |  |  |  |  |  |  |  |  |  |  |  |  |  |  |  |  |  |  |  |  |  |  |  |  |  |  |  |  |  |  |  |  |  |  |  |
|  |  |  | Critical Appraisal           |  |  |  |  |  |  |  |  |  |  |  |  |  |  |  |  |  |  |  |  |  |  |  |  |  |  |  |  |  |  |  |  |  |  |  |  |  |  |  |
|  |  |  | Critical Appraisal           |  |  |  |  |  |  |  |  |  |  |  |  |  |  |  |  |  |  |  |  |  |  |  |  |  |  |  |  |  |  |  |  |  |  |  |  |  |  |  |
|  |  |  | Critical Appraisal           |  |  |  |  |  |  |  |  |  |  |  |  |  |  |  |  |  |  |  |  |  |  |  |  |  |  |  |  |  |  |  |  |  |  |  |  |  |  |  |
|  |  |  | Critical Appraisal           |  |  |  |  |  |  |  |  |  |  |  |  |  |  |  |  |  |  |  |  |  |  |  |  |  |  |  |  |  |  |  |  |  |  |  |  |  |  |  |
|  |  |  | Critical Appraisal           |  |  |  |  |  |  |  |  |  |  |  |  |  |  |  |  |  |  |  |  |  |  |  |  |  |  |  |  |  |  |  |  |  |  |  |  |  |  |  |
|  |  |  | Critical Appraisal           |  |  |  |  |  |  |  |  |  |  |  |  |  |  |  |  |  |  |  |  |  |  |  |  |  |  |  |  |  |  |  |  |  |  |  |  |  |  |  |
|  |  |  | Critical Appraisal           |  |  |  |  |  |  |  |  |  |  |  |  |  |  |  |  |  |  |  |  |  |  |  |  |  |  |  |  |  |  |  |  |  |  |  |  |  |  |  |
|  |  |  | Critical Appraisal           |  |  |  |  |  |  |  |  |  |  |  |  |  |  |  |  |  |  |  |  |  |  |  |  |  |  |  |  |  |  |  |  |  |  |  |  |  |  |  |
|  |  |  | Critical Appraisal           |  |  |  |  |  |  |  |  |  |  |  |  |  |  |  |  |  |  |  |  |  |  |  |  |  |  |  |  |  |  |  |  |  |  |  |  |  |  |  |
|  |  |  | Critical Appraisal           |  |  |  |  |  |  |  |  |  |  |  |  |  |  |  |  |  |  |  |  |  |  |  |  |  |  |  |  |  |  |  |  |  |  |  |  |  |  |  |
|  |  |  | Critical Appraisal           |  |  |  |  |  |  |  |  |  |  |  |  |  |  |  |  |  |  |  |  |  |  |  |  |  |  |  |  |  |  |  |  |  |  |  |  |  |  |  |
|  |  |  | Critical Appraisal           |  |  |  |  |  |  |  |  |  |  |  |  |  |  |  |  |  |  |  |  |  |  |  |  |  |  |  |  |  |  |  |  |  |  |  |  |  |  |  |
|  |  |  | Critical Appraisal           |  |  |  |  |  |  |  |  |  |  |  |  |  |  |  |  |  |  |  |  |  |  |  |  |  |  |  |  |  |  |  |  |  |  |  |  |  |  |  |
|  |  |  | Critical Appraisal           |  |  |  |  |  |  |  |  |  |  |  |  |  |  |  |  |  |  |  |  |  |  |  |  |  |  |  |  |  |  |  |  |  |  |  |  |  |  |  |
|  |  |  | Critical Appraisal           |  |  |  |  |  |  |  |  |  |  |  |  |  |  |  |  |  |  |  |  |  |  |  |  |  |  |  |  |  |  |  |  |  |  |  |  |  |  |  |
|  |  |  | Critical Appraisal           |  |  |  |  |  |  |  |  |  |  |  |  |  |  |  |  |  |  |  |  |  |  |  |  |  |  |  |  |  |  |  |  |  |  |  |  |  |  |  |
|  |  |  | Critical Appraisal           |  |  |  |  |  |  |  |  |  |  |  |  |  |  |  |  |  |  |  |  |  |  |  |  |  |  |  |  |  |  |  |  |  |  |  |  |  |  |  |
|  |  |  | Critical Appraisal           |  |  |  |  |  |  |  |  |  |  |  |  |  |  |  |  |  |  |  |  |  |  |  |  |  |  |  |  |  |  |  |  |  |  |  |  |  |  |  |
|  |  |  | Critical Appraisal           |  |  |  |  |  |  |  |  |  |  |  |  |  |  |  |  |  |  |  |  |  |  |  |  |  |  |  |  |  |  |  |  |  |  |  |  |  |  |  |
|  |  |  | Critical Appraisal           |  |  |  |  |  |  |  |  |  |  |  |  |  |  |  |  |  |  |  |  |  |  |  |  |  |  |  |  |  |  |  |  |  |  |  |  |  |  |  |
|  |  |  | Critical Appraisal           |  |  |  |  |  |  |  |  |  |  |  |  |  |  |  |  |  |  |  |  |  |  |  |  |  |  |  |  |  |  |  |  |  |  |  |  |  |  |  |
|  |  |  | Critical Appraisal           |  |  |  |  |  |  |  |  |  |  |  |  |  |  |  |  |  |  |  |  |  |  |  |  |  |  |  |  |  |  |  |  |  |  |  |  |  |  |  |
|  |  |  | Critical Appraisal           |  |  |  |  |  |  |  |  |  |  |  |  |  |  |  |  |  |  |  |  |  |  |  |  |  |  |  |  |  |  |  |  |  |  |  |  |  |  |  |
|  |  |  | Critical Appraisal           |  |  |  |  |  |  |  |  |  |  |  |  |  |  |  |  |  |  |  |  |  |  |  |  |  |  |  |  |  |  |  |  |  |  |  |  |  |  |  |
|  |  |  | Critical Appraisal           |  |  |  |  |  |  |  |  |  |  |  |  |  |  |  |  |  |  |  |  |  |  |  |  |  |  |  |  |  |  |  |  |  |  |  |  |  |  |  |
|  |  |  | Critical Appraisal           |  |  |  |  |  |  |  |  |  |  |  |  |  |  |  |  |  |  |  |  |  |  |  |  |  |  |  |  |  |  |  |  |  |  |  |  |  |  |  |
|  |  |  | Critical Appraisal</         |  |  |  |  |  |  |  |  |  |  |  |  |  |  |  |  |  |  |  |  |  |  |  |  |  |  |  |  |  |  |  |  |  |  |  |  |  |  |  |
